# Supplementary material for: Computational exploration for possible reaction pathways, regioselectivity, and influence of substrate in gold-catalyzed cycloaddition of cyanamides with enynamides
Source: Royal Society of Chemistry journal article supplement (doi:10.1039/d2ra02682a), 2022-01-01
Supplement: d2ra02682a1.pdf [file d2ra02682a1.pdf]

# Supporting information

Computational exploration for possible reaction pathways, regioselectivity, and influence of substrate in gold-catalyzed cycloaddition of cyanamides with enynamides

Xinghui Zhang \*, Haixiong Shi, Caihong Ji, Jianyi Wang and Liping Jiang

*School of Chemical Engineering, Lanzhou University of Arts and Science, Lanzhou 730010, China*

## Table of Contents

1. Fig.S1 Full energy profile for Au-catalyzed cycloaddition of dimethylcyanamide and enynamide B-r1 (R1=R2=Ph, R3=Me). Relative energies are in kcal/mol.
2. Fig.S2 Representative structures in Au-catalyzed pathway a of Fig.S1.
3. Fig.S3 Full energy profile for series C (C-r1:R1 is thienyl, R2=Ms, R3=Me) with selected structures (selected bond lengths are in Å). Relative energies are in kcal/mol.
4. Cartesian Coordinates

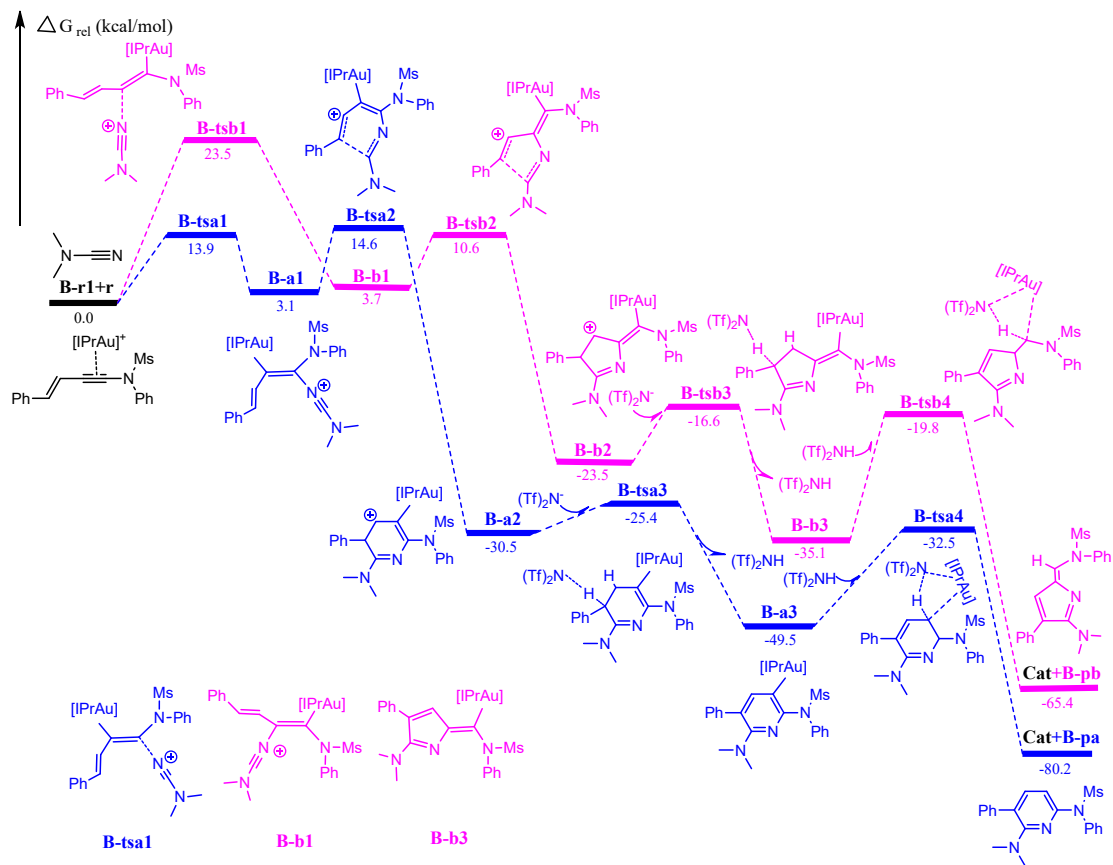

Fig.S1 Full energy profile for Au-catalyzed cycloaddition of dimethylcyanamide and enynamide B-r1 (R1=R2=Ph, R3=Me). Relative energies are in kcal/mol.

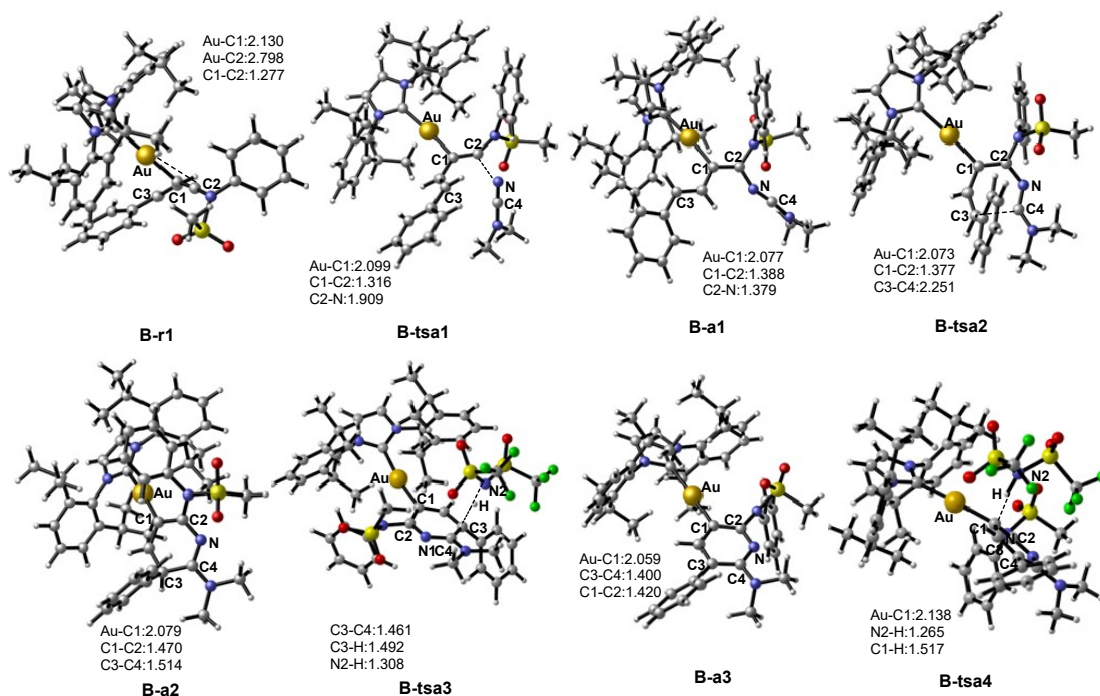

Fig.S2 Representative structures in Au-catalyzed tsa3 pathway a of Fig.S1.

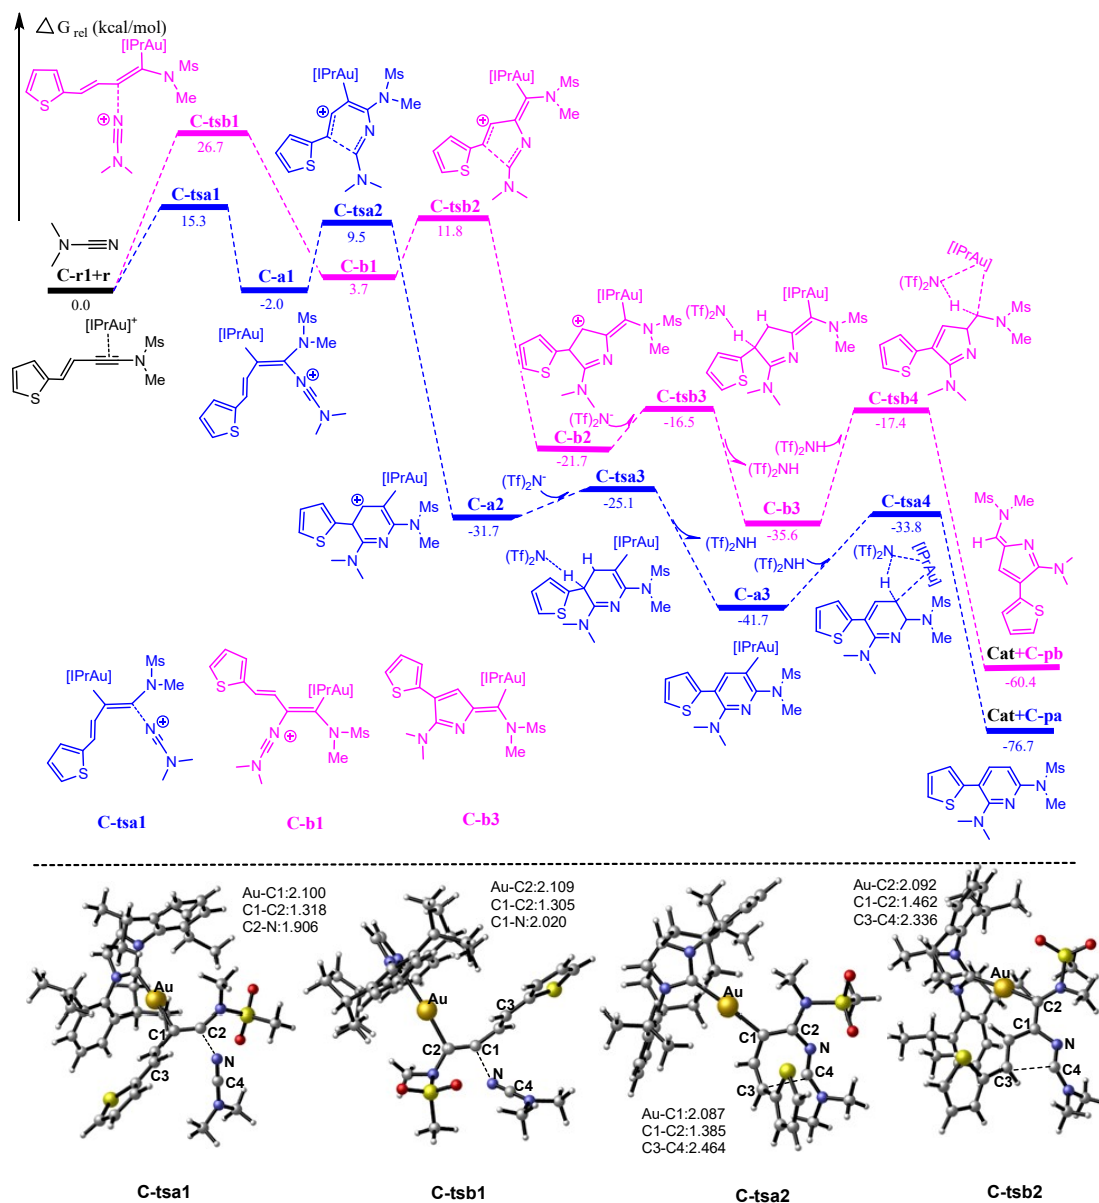

Fig.S3 Full energy profile for series C (C-r1:R1is thieryl, R2=Ms, R3=Me) with selected structures (selected bond lengths are in Å). Relative energies are in kcal/mol.

Cartesian Coordinates

**A-r1**

| Center<br>Number | Atomic<br>Number | Atomic<br>Type | Coordinates (Angstroms) |           |           |
|------------------|------------------|----------------|-------------------------|-----------|-----------|
|                  |                  |                | X                       | Y         | Z         |
| 1                | 6                | 0              | -1.496913               | -1.453254 | -1.641393 |
| 2                | 6                | 0              | -1.592464               | -2.600643 | -1.084869 |
| 3                | 6                | 0              | -1.931888               | -0.995003 | -2.967639 |
| 4                | 7                | 0              | -1.749278               | -3.689201 | -0.423255 |
| 5                | 6                | 0              | -2.647301               | 0.107354  | -3.269482 |
| 6                | 79               | 0              | -0.091069               | -0.335751 | -0.495678 |
| 7                | 7                | 0              | 2.721780                | 0.328008  | 0.485608  |
| 8                | 6                | 0              | 3.481807                | 1.282892  | 1.149848  |
| 9                | 6                | 0              | 2.628877                | 2.259988  | 1.544531  |
| 10               | 7                | 0              | 1.363914                | 1.904263  | 1.090824  |
| 11               | 6                | 0              | 3.298408                | -0.822846 | -0.190851 |
| 12               | 6                | 0              | 0.169655                | 2.663870  | 1.427616  |
| 13               | 6                | 0              | -0.499371               | 2.311911  | 2.619724  |
| 14               | 6                | 0              | -1.622781               | 3.063705  | 2.986261  |
| 15               | 6                | 0              | -2.056427               | 4.128627  | 2.207548  |
| 16               | 6                | 0              | -1.367224               | 4.461520  | 1.045659  |
| 17               | 6                | 0              | -0.236279               | 3.751118  | 0.619024  |
| 18               | 6                | 0              | 3.677249                | -0.653334 | -1.540393 |
| 19               | 6                | 0              | 4.241219                | -1.751268 | -2.203922 |
| 20               | 6                | 0              | 4.435298                | -2.962081 | -1.552111 |
| 21               | 6                | 0              | 4.076977                | -3.091132 | -0.213044 |
| 22               | 6                | 0              | 3.505657                | -2.034502 | 0.510290  |
| 23               | 6                | 0              | -3.272775               | 1.088911  | -2.381525 |
| 24               | 6                | 0              | -3.557104               | 2.370400  | -2.895182 |
| 25               | 6                | 0              | -4.163161               | 3.341069  | -2.102881 |
| 26               | 6                | 0              | -4.516857               | 3.044472  | -0.783395 |
| 27               | 6                | 0              | -4.266140               | 1.771521  | -0.267821 |
| 28               | 6                | 0              | -3.653843               | 0.797836  | -1.056500 |
| 29               | 6                | 0              | -2.518351               | -3.696471 | 2.281337  |
| 30               | 16               | 0              | -3.234501               | -3.843515 | 0.637714  |
| 31               | 8                | 0              | -3.700353               | -5.206250 | 0.424182  |
| 32               | 8                | 0              | -4.024901               | -2.660045 | 0.339076  |
| 33               | 6                | 0              | -0.907612               | -4.900734 | -0.577418 |
| 34               | 6                | 0              | 3.174494                | -2.321752 | 1.980360  |
| 35               | 6                | 0              | 3.863407                | -1.403660 | 3.008154  |
| 36               | 6                | 0              | 1.663622                | -2.440315 | 2.255533  |
| 37               | 6                | 0              | 3.538621                | 0.667382  | -2.293909 |
| 38               | 6                | 0              | 4.922809                | 1.246099  | -2.652829 |
| 39               | 6                | 0              | 2.656883                | 0.522365  | -3.549045 |
| 40               | 6                | 0              | -0.044575               | 1.178060  | 3.535399  |
| 41               | 6                | 0              | -1.129377               | 0.091181  | 3.665906  |
| 42               | 6                | 0              | 0.378974                | 1.706873  | 4.920419  |
| 43               | 6                | 0              | 0.429035                | 4.242231  | -0.672648 |
| 44               | 6                | 0              | 0.296938                | 3.261034  | -1.851610 |
| 45               | 6                | 0              | 1.877447                | 4.743484  | -0.508906 |
| 46               | 1                | 0              | -1.622115               | -1.642363 | -3.784943 |
| 47               | 1                | 0              | -2.806480               | 0.283366  | -4.331991 |
| 48               | 1                | 0              | 4.546113                | 1.174207  | 1.278676  |
| 49               | 1                | 0              | 2.797372                | 3.169352  | 2.097507  |
| 50               | 1                | 0              | -2.153600               | 2.816145  | 3.900127  |
| 51               | 1                | 0              | -2.924278               | 4.707497  | 2.508882  |
| 52               | 1                | 0              | -1.708741               | 5.300126  | 0.446638  |
| 53               | 1                | 0              | 4.541710                | -1.646623 | -3.241435 |

|    |   |   |           |           |           |
|----|---|---|-----------|-----------|-----------|
| 54 | 1 | 0 | 4.881126  | -3.800691 | -2.078537 |
| 55 | 1 | 0 | 4.253901  | -4.034242 | 0.296080  |
| 56 | 1 | 0 | -3.297097 | 2.598867  | -3.925546 |
| 57 | 1 | 0 | -4.374873 | 4.322106  | -2.517566 |
| 58 | 1 | 0 | -5.008581 | 3.793718  | -0.170258 |
| 59 | 1 | 0 | -4.571494 | 1.525958  | 0.744835  |
| 60 | 1 | 0 | -3.531197 | -0.205100 | -0.664003 |
| 61 | 1 | 0 | -3.354786 | -3.776330 | 2.979607  |
| 62 | 1 | 0 | -1.818473 | -4.517302 | 2.440415  |
| 63 | 1 | 0 | -2.035171 | -2.723085 | 2.368571  |
| 64 | 1 | 0 | -0.359714 | -5.094656 | 0.348331  |
| 65 | 1 | 0 | -1.548761 | -5.750133 | -0.815449 |
| 66 | 1 | 0 | -0.201207 | -4.721252 | -1.387005 |
| 67 | 1 | 0 | 3.590182  | -3.320449 | 2.157518  |
| 68 | 1 | 0 | 4.929680  | -1.290505 | 2.788637  |
| 69 | 1 | 0 | 3.777651  | -1.845458 | 4.006185  |
| 70 | 1 | 0 | 3.413997  | -0.409077 | 3.053403  |
| 71 | 1 | 0 | 1.201517  | -3.166592 | 1.578054  |
| 72 | 1 | 0 | 1.498051  | -2.779374 | 3.284253  |
| 73 | 1 | 0 | 1.146258  | -1.486910 | 2.125652  |
| 74 | 1 | 0 | 3.048387  | 1.392462  | -1.639481 |
| 75 | 1 | 0 | 5.543255  | 1.386934  | -1.762100 |
| 76 | 1 | 0 | 4.811059  | 2.217436  | -3.144974 |
| 77 | 1 | 0 | 5.468256  | 0.587967  | -3.336690 |
| 78 | 1 | 0 | 1.660714  | 0.146947  | -3.293904 |
| 79 | 1 | 0 | 2.539006  | 1.493311  | -4.040466 |
| 80 | 1 | 0 | 3.100070  | -0.163645 | -4.277934 |
| 81 | 1 | 0 | 0.833870  | 0.702466  | 3.091854  |
| 82 | 1 | 0 | -1.410416 | -0.296931 | 2.680530  |
| 83 | 1 | 0 | -0.762416 | -0.738289 | 4.280355  |
| 84 | 1 | 0 | -2.035066 | 0.479953  | 4.142017  |
| 85 | 1 | 0 | -0.459618 | 2.172416  | 5.447671  |
| 86 | 1 | 0 | 1.173727  | 2.454490  | 4.836416  |
| 87 | 1 | 0 | 0.749819  | 0.887211  | 5.544476  |
| 88 | 1 | 0 | -0.155496 | 5.125905  | -0.953249 |
| 89 | 1 | 0 | -0.745195 | 2.969005  | -2.007734 |
| 90 | 1 | 0 | 0.657489  | 3.737520  | -2.769882 |
| 91 | 1 | 0 | 0.882765  | 2.351527  | -1.698977 |
| 92 | 1 | 0 | 1.973999  | 5.418099  | 0.347958  |
| 93 | 1 | 0 | 2.172332  | 5.301517  | -1.403408 |
| 94 | 1 | 0 | 2.593430  | 3.926982  | -0.386747 |
| 95 | 6 | 0 | 1.411829  | 0.708914  | 0.438848  |

Sum of electronic and zero-point Energies= -2363.287675  
Sum of electronic and thermal Energies= -2363.237144  
Sum of electronic and thermal Enthalpies= -2363.236200  
Sum of electronic and thermal Free Energies= -2363.379662

#### A- tsal

| Center<br>Number | Atomic<br>Number | Atomic<br>Type | Coordinates (Angstroms) |           |           |
|------------------|------------------|----------------|-------------------------|-----------|-----------|
|                  |                  |                | X                       | Y         | Z         |
| 1                | 6                | 0              | 1.746564                | -0.554093 | -0.305237 |
| 2                | 6                | 0              | 1.936337                | -1.854847 | -0.370835 |
| 3                | 6                | 0              | 2.741995                | 0.512171  | -0.361901 |
| 4                | 7                | 0              | 1.294082                | -3.001147 | -0.594776 |
| 5                | 6                | 0              | 3.743975                | 0.587829  | -1.267132 |
| 6                | 79               | 0              | -0.251715               | 0.055611  | -0.089447 |

|    |    |   |           |           |           |
|----|----|---|-----------|-----------|-----------|
| 7  | 6  | 0 | -2.167050 | 0.788362  | 0.087219  |
| 8  | 7  | 0 | -3.301508 | 0.348718  | -0.529060 |
| 9  | 6  | 0 | -4.389025 | 1.137137  | -0.168732 |
| 10 | 6  | 0 | -3.921817 | 2.095757  | 0.668126  |
| 11 | 7  | 0 | -2.560490 | 1.862805  | 0.828617  |
| 12 | 6  | 0 | -3.418159 | -0.865489 | -1.319085 |
| 13 | 6  | 0 | -1.677137 | 2.750975  | 1.564641  |
| 14 | 6  | 0 | -1.441659 | 2.543474  | 2.943832  |
| 15 | 6  | 0 | -0.588144 | 3.456443  | 3.580036  |
| 16 | 6  | 0 | -0.005213 | 4.521719  | 2.900001  |
| 17 | 6  | 0 | -0.272251 | 4.707739  | 1.549438  |
| 18 | 6  | 0 | -1.114628 | 3.832307  | 0.851853  |
| 19 | 6  | 0 | -3.714116 | -2.057366 | -0.620167 |
| 20 | 6  | 0 | -3.829955 | -3.238498 | -1.364408 |
| 21 | 6  | 0 | -3.669167 | -3.234845 | -2.744736 |
| 22 | 6  | 0 | -3.406713 | -2.040032 | -3.408574 |
| 23 | 6  | 0 | -3.281169 | -0.820762 | -2.726095 |
| 24 | 7  | 0 | 3.781958  | -2.348236 | -0.322556 |
| 25 | 6  | 0 | 4.497779  | -2.143046 | 0.594136  |
| 26 | 7  | 0 | 5.294312  | -1.935567 | 1.599525  |
| 27 | 6  | 0 | 5.142017  | -2.720030 | 2.838963  |
| 28 | 6  | 0 | 6.390927  | -0.957326 | 1.500953  |
| 29 | 6  | 0 | -2.014716 | 1.423608  | 3.821471  |
| 30 | 6  | 0 | -3.552301 | 1.337945  | 3.863901  |
| 31 | 6  | 0 | -1.377684 | 0.047176  | 3.549529  |
| 32 | 6  | 0 | -1.403590 | 4.106885  | -0.622365 |
| 33 | 6  | 0 | -2.201359 | 5.415415  | -0.795893 |
| 34 | 6  | 0 | -0.114206 | 4.128761  | -1.465460 |
| 35 | 6  | 0 | 0.703431  | -3.328315 | -1.907558 |
| 36 | 6  | 0 | 2.342590  | -5.488739 | 0.022634  |
| 37 | 16 | 0 | 1.244106  | -4.211030 | 0.659706  |
| 38 | 8  | 0 | -0.114428 | -4.747122 | 0.688325  |
| 39 | 8  | 0 | 1.860035  | -3.594799 | 1.834863  |
| 40 | 6  | 0 | 4.747408  | 1.648842  | -1.395830 |
| 41 | 6  | 0 | 5.719489  | 1.533183  | -2.408538 |
| 42 | 6  | 0 | 6.709503  | 2.500512  | -2.572472 |
| 43 | 6  | 0 | 6.749390  | 3.608532  | -1.725266 |
| 44 | 6  | 0 | 5.791304  | 3.740502  | -0.714032 |
| 45 | 6  | 0 | 4.803596  | 2.775097  | -0.548993 |
| 46 | 6  | 0 | -3.023809 | 0.418245  | -3.593861 |
| 47 | 6  | 0 | -4.041173 | 1.563042  | -3.427438 |
| 48 | 6  | 0 | -1.575251 | 0.936260  | -3.516497 |
| 49 | 6  | 0 | -3.975616 | -2.096299 | 0.884176  |
| 50 | 6  | 0 | -5.490891 | -2.194069 | 1.163289  |
| 51 | 6  | 0 | -3.218648 | -3.231946 | 1.595903  |
| 52 | 1  | 0 | 2.583131  | 1.328269  | 0.338958  |
| 53 | 1  | 0 | 3.829451  | -0.215121 | -1.996885 |
| 54 | 1  | 0 | -5.380229 | 0.944985  | -0.544933 |
| 55 | 1  | 0 | -4.422327 | 2.910017  | 1.165812  |
| 56 | 1  | 0 | -0.386491 | 3.326756  | 4.639391  |
| 57 | 1  | 0 | 0.644678  | 5.212835  | 3.428671  |
| 58 | 1  | 0 | 0.169358  | 5.549561  | 1.025606  |
| 59 | 1  | 0 | -4.057454 | -4.167702 | -0.853011 |
| 60 | 1  | 0 | -3.768706 | -4.158179 | -3.308006 |
| 61 | 1  | 0 | -3.308646 | -2.041892 | -4.490432 |
| 62 | 1  | 0 | 4.201958  | -3.271180 | 2.801567  |
| 63 | 1  | 0 | 5.983186  | -3.411065 | 2.952501  |
| 64 | 1  | 0 | 5.120588  | -2.032959 | 3.689354  |
| 65 | 1  | 0 | 6.293924  | -0.389759 | 0.575297  |

|     |   |   |           |           |           |
|-----|---|---|-----------|-----------|-----------|
| 66  | 1 | 0 | 6.333282  | -0.270676 | 2.349916  |
| 67  | 1 | 0 | 7.355670  | -1.473789 | 1.516777  |
| 68  | 1 | 0 | -1.710090 | 1.699798  | 4.837860  |
| 69  | 1 | 0 | -4.003876 | 2.321748  | 4.028345  |
| 70  | 1 | 0 | -3.856450 | 0.692221  | 4.694053  |
| 71  | 1 | 0 | -3.976590 | 0.913661  | 2.951077  |
| 72  | 1 | 0 | -0.285656 | 0.100238  | 3.596755  |
| 73  | 1 | 0 | -1.713915 | -0.673516 | 4.302807  |
| 74  | 1 | 0 | -1.647287 | -0.345489 | 2.566235  |
| 75  | 1 | 0 | -2.025120 | 3.296579  | -1.011733 |
| 76  | 1 | 0 | -3.139424 | 5.392169  | -0.232208 |
| 77  | 1 | 0 | -2.444058 | 5.575769  | -1.851351 |
| 78  | 1 | 0 | -1.628632 | 6.282346  | -0.450830 |
| 79  | 1 | 0 | 0.437607  | 3.188266  | -1.371274 |
| 80  | 1 | 0 | -0.357571 | 4.276479  | -2.522610 |
| 81  | 1 | 0 | 0.552506  | 4.943630  | -1.165436 |
| 82  | 1 | 0 | 1.474814  | -3.642670 | -2.617813 |
| 83  | 1 | 0 | 0.191122  | -2.440482 | -2.281813 |
| 84  | 1 | 0 | -0.034430 | -4.120240 | -1.771534 |
| 85  | 1 | 0 | 2.385342  | -6.269191 | 0.785008  |
| 86  | 1 | 0 | 1.922719  | -5.891509 | -0.899718 |
| 87  | 1 | 0 | 3.324617  | -5.048237 | -0.148768 |
| 88  | 1 | 0 | 5.689136  | 0.675008  | -3.075350 |
| 89  | 1 | 0 | 7.446033  | 2.390845  | -3.362779 |
| 90  | 1 | 0 | 7.516825  | 4.366072  | -1.851387 |
| 91  | 1 | 0 | 5.815608  | 4.602831  | -0.054192 |
| 92  | 1 | 0 | 4.067433  | 2.900562  | 0.239306  |
| 93  | 1 | 0 | -3.158321 | 0.056207  | -4.619991 |
| 94  | 1 | 0 | -5.070350 | 1.190367  | -3.450005 |
| 95  | 1 | 0 | -3.928446 | 2.271245  | -4.254707 |
| 96  | 1 | 0 | -3.898807 | 2.122482  | -2.499993 |
| 97  | 1 | 0 | -1.422446 | 1.725921  | -4.260252 |
| 98  | 1 | 0 | -1.336634 | 1.348494  | -2.533231 |
| 99  | 1 | 0 | -0.857817 | 0.136070  | -3.724282 |
| 100 | 1 | 0 | -3.623114 | -1.157467 | 1.319156  |
| 101 | 1 | 0 | -6.042976 | -1.361549 | 0.715598  |
| 102 | 1 | 0 | -5.681211 | -2.184933 | 2.241455  |
| 103 | 1 | 0 | -5.905121 | -3.122968 | 0.757425  |
| 104 | 1 | 0 | -2.147948 | -3.211167 | 1.378944  |
| 105 | 1 | 0 | -3.352142 | -3.142023 | 2.678806  |
| 106 | 1 | 0 | -3.595384 | -4.218386 | 1.307106  |

Sum of electronic and zero-point Energies= -2590.605608  
Sum of electronic and thermal Energies= -2590.548198  
Sum of electronic and thermal Enthalpies= -2590.547254  
Sum of electronic and thermal Free Energies= -2590.707601

#### A-tsb1

| Center Number | Atomic Number | Atomic Type | Coordinates (Angstroms) |           |           |
|---------------|---------------|-------------|-------------------------|-----------|-----------|
|               |               |             | X                       | Y         | Z         |
| 1             | 6             | 0           | 2.314849                | -0.721717 | -1.205559 |
| 2             | 6             | 0           | 1.358968                | -1.517578 | -0.821074 |
| 3             | 6             | 0           | 2.847762                | 0.587710  | -1.355260 |
| 4             | 7             | 0           | 1.413701                | -2.930448 | -0.717264 |
| 5             | 6             | 0           | 3.181015                | 1.356897  | -0.285819 |
| 6             | 79            | 0           | -0.383706               | -0.443902 | -0.299779 |
| 7             | 6             | 0           | -2.157776               | 0.453195  | 0.251601  |

|    |    |   |           |           |           |
|----|----|---|-----------|-----------|-----------|
| 8  | 7  | 0 | -2.599635 | 0.712746  | 1.516074  |
| 9  | 6  | 0 | -3.859067 | 1.299889  | 1.482553  |
| 10 | 6  | 0 | -4.219142 | 1.387879  | 0.178603  |
| 11 | 7  | 0 | -3.163591 | 0.876356  | -0.567740 |
| 12 | 6  | 0 | -1.820119 | 0.568291  | 2.734883  |
| 13 | 6  | 0 | -3.228158 | 0.684076  | -2.006936 |
| 14 | 6  | 0 | -2.766208 | 1.691079  | -2.885494 |
| 15 | 6  | 0 | -2.873533 | 1.426341  | -4.258519 |
| 16 | 6  | 0 | -3.421612 | 0.242565  | -4.742527 |
| 17 | 6  | 0 | -3.895236 | -0.713215 | -3.852455 |
| 18 | 6  | 0 | -3.813579 | -0.515772 | -2.468209 |
| 19 | 6  | 0 | -1.028857 | 1.672377  | 3.120586  |
| 20 | 6  | 0 | -0.267681 | 1.554643  | 4.290228  |
| 21 | 6  | 0 | -0.296087 | 0.391626  | 5.049543  |
| 22 | 6  | 0 | -1.110439 | -0.667568 | 4.661347  |
| 23 | 6  | 0 | -1.903708 | -0.614229 | 3.506042  |
| 24 | 7  | 0 | 3.867775  | -1.877612 | -1.829674 |
| 25 | 6  | 0 | 4.953454  | -1.692361 | -1.406854 |
| 26 | 7  | 0 | 6.145853  | -1.492325 | -0.915337 |
| 27 | 6  | 0 | 6.523775  | -2.095729 | 0.374782  |
| 28 | 6  | 0 | 7.181679  | -0.810200 | -1.703910 |
| 29 | 6  | 0 | -2.167289 | 3.049579  | -2.500980 |
| 30 | 6  | 0 | -3.062404 | 3.935284  | -1.613515 |
| 31 | 6  | 0 | -0.734733 | 2.954528  | -1.943424 |
| 32 | 6  | 0 | -4.404615 | -1.569774 | -1.534082 |
| 33 | 6  | 0 | -5.946443 | -1.545560 | -1.591131 |
| 34 | 6  | 0 | -3.870315 | -2.983460 | -1.828971 |
| 35 | 6  | 0 | -2.784660 | -1.839249 | 3.230528  |
| 36 | 6  | 0 | -4.294885 | -1.545430 | 3.143885  |
| 37 | 6  | 0 | -2.306228 | -2.699816 | 2.046869  |
| 38 | 6  | 0 | -1.004792 | 2.993351  | 2.354379  |
| 39 | 6  | 0 | 0.421727  | 3.400140  | 1.943819  |
| 40 | 6  | 0 | -1.685230 | 4.112923  | 3.168790  |
| 41 | 6  | 0 | 0.165879  | -3.650758 | -1.036480 |
| 42 | 6  | 0 | 3.751599  | 2.698349  | -0.308480 |
| 43 | 6  | 0 | 4.148915  | 3.276489  | 0.913914  |
| 44 | 6  | 0 | 4.721651  | 4.545264  | 0.953108  |
| 45 | 6  | 0 | 4.901783  | 5.264215  | -0.230095 |
| 46 | 6  | 0 | 4.505149  | 4.708406  | -1.452191 |
| 47 | 6  | 0 | 3.936369  | 3.440816  | -1.493795 |
| 48 | 6  | 0 | 3.091868  | -4.977809 | -0.062083 |
| 49 | 16 | 0 | 2.235687  | -3.567905 | 0.661748  |
| 50 | 8  | 0 | 1.256011  | -4.072962 | 1.628831  |
| 51 | 8  | 0 | 3.243667  | -2.584867 | 1.078568  |
| 52 | 1  | 0 | 3.033283  | 0.926893  | -2.372418 |
| 53 | 1  | 0 | 3.013455  | 0.929230  | 0.701094  |
| 54 | 1  | 0 | -4.373714 | 1.592465  | 2.382936  |
| 55 | 1  | 0 | -5.113640 | 1.767100  | -0.287484 |
| 56 | 1  | 0 | -2.525272 | 2.177836  | -4.961147 |
| 57 | 1  | 0 | -3.493424 | 0.074993  | -5.813001 |
| 58 | 1  | 0 | -4.344381 | -1.624382 | -4.233952 |
| 59 | 1  | 0 | 0.345779  | 2.390472  | 4.611502  |
| 60 | 1  | 0 | 0.300742  | 0.314004  | 5.953375  |
| 61 | 1  | 0 | -1.143328 | -1.564871 | 5.271994  |
| 62 | 1  | 0 | 5.624529  | -2.445430 | 0.882560  |
| 63 | 1  | 0 | 7.218531  | -2.927145 | 0.214370  |
| 64 | 1  | 0 | 7.012424  | -1.333812 | 0.988592  |
| 65 | 1  | 0 | 6.739737  | -0.397006 | -2.610620 |
| 66 | 1  | 0 | 7.612975  | 0.001246  | -1.110637 |



|     |   |   |           |           |           |
|-----|---|---|-----------|-----------|-----------|
| 67  | 1 | 0 | 7.972797  | -1.515912 | -1.977947 |
| 68  | 1 | 0 | -2.083131 | 3.583090  | -3.455102 |
| 69  | 1 | 0 | -2.666875 | 4.956209  | -1.602045 |
| 70  | 1 | 0 | -3.101907 | 3.590727  | -0.577534 |
| 71  | 1 | 0 | -4.085979 | 3.982129  | -1.999087 |
| 72  | 1 | 0 | -0.705971 | 2.472422  | -0.963576 |
| 73  | 1 | 0 | -0.088996 | 2.380200  | -2.614887 |
| 74  | 1 | 0 | -0.309321 | 3.958643  | -1.837640 |
| 75  | 1 | 0 | -4.112549 | -1.328357 | -0.508877 |
| 76  | 1 | 0 | -6.344729 | -0.559548 | -1.331805 |
| 77  | 1 | 0 | -6.366386 | -2.274768 | -0.890695 |
| 78  | 1 | 0 | -6.309095 | -1.795961 | -2.593484 |
| 79  | 1 | 0 | -2.777414 | -3.009469 | -1.793679 |
| 80  | 1 | 0 | -4.253352 | -3.690814 | -1.086484 |
| 81  | 1 | 0 | -4.184308 | -3.343014 | -2.813919 |
| 82  | 1 | 0 | -2.658448 | -2.463386 | 4.122712  |
| 83  | 1 | 0 | -4.628371 | -0.911441 | 3.971994  |
| 84  | 1 | 0 | -4.852120 | -2.486024 | 3.202867  |
| 85  | 1 | 0 | -4.575819 | -1.060875 | 2.205525  |
| 86  | 1 | 0 | -2.893199 | -3.624225 | 2.004135  |
| 87  | 1 | 0 | -2.430112 | -2.181242 | 1.092323  |
| 88  | 1 | 0 | -1.252373 | -2.973304 | 2.152576  |
| 89  | 1 | 0 | -1.577267 | 2.871800  | 1.431312  |
| 90  | 1 | 0 | 0.896278  | 2.619800  | 1.342097  |
| 91  | 1 | 0 | 0.397494  | 4.319472  | 1.349938  |
| 92  | 1 | 0 | 1.056982  | 3.589719  | 2.815141  |
| 93  | 1 | 0 | -2.716494 | 3.852427  | 3.427160  |
| 94  | 1 | 0 | -1.705111 | 5.044966  | 2.594499  |
| 95  | 1 | 0 | -1.149353 | 4.307527  | 4.103532  |
| 96  | 1 | 0 | 0.361853  | -4.724405 | -1.063191 |
| 97  | 1 | 0 | -0.146073 | -3.339028 | -2.034239 |
| 98  | 1 | 0 | -0.632621 | -3.452304 | -0.315923 |
| 99  | 1 | 0 | 4.008133  | 2.716838  | 1.834786  |
| 100 | 1 | 0 | 5.025187  | 4.973539  | 1.903336  |
| 101 | 1 | 0 | 5.344836  | 6.255058  | -0.203098 |
| 102 | 1 | 0 | 4.638277  | 5.270123  | -2.371701 |
| 103 | 1 | 0 | 3.623282  | 3.030084  | -2.448561 |
| 104 | 1 | 0 | 3.741348  | -4.611966 | -0.856426 |
| 105 | 1 | 0 | 3.664009  | -5.438605 | 0.745554  |
| 106 | 1 | 0 | 2.362946  | -5.689448 | -0.449446 |

Sum of electronic and zero-point Energies= -2590.591663  
Sum of electronic and thermal Energies= -2590.534464  
Sum of electronic and thermal Enthalpies= -2590.533520  
Sum of electronic and thermal Free Energies= -2590.692132

#### A-a1

| Center<br>Number | Atomic<br>Number | Atomic<br>Type | Coordinates (Angstroms) |           |           |
|------------------|------------------|----------------|-------------------------|-----------|-----------|
|                  |                  |                | X                       | Y         | Z         |
| 1                | 6                | 0              | 2.013240                | 0.132180  | -0.471973 |
| 2                | 6                | 0              | 2.855995                | -0.967223 | -0.431033 |
| 3                | 6                | 0              | 2.642005                | 1.428194  | -0.627837 |
| 4                | 7                | 0              | 2.488603                | -2.345801 | -0.516862 |
| 5                | 6                | 0              | 1.969532                | 2.585602  | -0.862181 |
| 6                | 79               | 0              | -0.043955               | 0.018776  | -0.183394 |
| 7                | 6                | 0              | -2.098071               | 0.001414  | 0.145448  |
| 8                | 7                | 0              | -3.059172               | -0.575571 | -0.636828 |

|    |    |   |           |           |           |
|----|----|---|-----------|-----------|-----------|
| 9  | 6  | 0 | -4.326300 | -0.345892 | -0.112237 |
| 10 | 6  | 0 | -4.158465 | 0.398069  | 1.007096  |
| 11 | 7  | 0 | -2.790965 | 0.596783  | 1.160802  |
| 12 | 6  | 0 | -2.814979 | -1.456445 | -1.765505 |
| 13 | 6  | 0 | -2.234970 | 1.454072  | 2.195519  |
| 14 | 6  | 0 | -1.828766 | 0.909249  | 3.435139  |
| 15 | 6  | 0 | -1.310021 | 1.809617  | 4.377622  |
| 16 | 6  | 0 | -1.218077 | 3.174161  | 4.124774  |
| 17 | 6  | 0 | -1.665191 | 3.683294  | 2.911572  |
| 18 | 6  | 0 | -2.186222 | 2.839815  | 1.922872  |
| 19 | 6  | 0 | -2.746119 | -2.842628 | -1.493873 |
| 20 | 6  | 0 | -2.488225 | -3.705018 | -2.567373 |
| 21 | 6  | 0 | -2.317769 | -3.215604 | -3.857105 |
| 22 | 6  | 0 | -2.437955 | -1.850976 | -4.100448 |
| 23 | 6  | 0 | -2.703439 | -0.932013 | -3.074054 |
| 24 | 7  | 0 | 4.222219  | -0.784418 | -0.329149 |
| 25 | 6  | 0 | 5.325203  | -1.194488 | -0.186046 |
| 26 | 7  | 0 | 6.493391  | -1.540734 | 0.236119  |
| 27 | 6  | 0 | 6.742944  | -1.700991 | 1.690639  |
| 28 | 6  | 0 | 7.628930  | -1.735104 | -0.685906 |
| 29 | 6  | 0 | -1.913454 | -0.558125 | 3.872227  |
| 30 | 6  | 0 | -3.328546 | -1.166424 | 3.828508  |
| 31 | 6  | 0 | -0.881426 | -1.471319 | 3.188396  |
| 32 | 6  | 0 | -2.734075 | 3.452117  | 0.635118  |
| 33 | 6  | 0 | -4.122157 | 4.081963  | 0.878765  |
| 34 | 6  | 0 | -1.779739 | 4.487897  | 0.014572  |
| 35 | 6  | 0 | 1.450405  | -2.740395 | -1.486510 |
| 36 | 6  | 0 | 3.162090  | -4.816127 | 0.467441  |
| 37 | 16 | 0 | 2.490978  | -3.217535 | 0.963042  |
| 38 | 8  | 0 | 1.128753  | -3.448197 | 1.453156  |
| 39 | 8  | 0 | 3.486753  | -2.553545 | 1.816151  |
| 40 | 6  | 0 | 2.559226  | 3.906784  | -1.060795 |
| 41 | 6  | 0 | 1.780282  | 4.916314  | -1.660340 |
| 42 | 6  | 0 | 2.303432  | 6.186430  | -1.889754 |
| 43 | 6  | 0 | 3.614785  | 6.479691  | -1.511002 |
| 44 | 6  | 0 | 4.398112  | 5.494129  | -0.900633 |
| 45 | 6  | 0 | 3.879243  | 4.223430  | -0.678227 |
| 46 | 6  | 0 | -2.889074 | 0.529315  | -3.504654 |
| 47 | 6  | 0 | -4.241994 | 1.150167  | -3.106628 |
| 48 | 6  | 0 | -1.715564 | 1.455432  | -3.136161 |
| 49 | 6  | 0 | -3.030955 | -3.434959 | -0.113555 |
| 50 | 6  | 0 | -4.461939 | -4.014874 | -0.073294 |
| 51 | 6  | 0 | -2.009961 | -4.501566 | 0.319876  |
| 52 | 1  | 0 | 3.730349  | 1.469567  | -0.613499 |
| 53 | 1  | 0 | 0.886302  | 2.528263  | -0.951314 |
| 54 | 1  | 0 | -5.216273 | -0.727388 | -0.584567 |
| 55 | 1  | 0 | -4.872650 | 0.794397  | 1.709688  |
| 56 | 1  | 0 | -0.982190 | 1.422592  | 5.337989  |
| 57 | 1  | 0 | -0.815341 | 3.841120  | 4.881246  |
| 58 | 1  | 0 | -1.617413 | 4.751726  | 2.729628  |
| 59 | 1  | 0 | -2.435900 | -4.773947 | -2.389126 |
| 60 | 1  | 0 | -2.120130 | -3.898108 | -4.678550 |
| 61 | 1  | 0 | -2.341969 | -1.480853 | -5.117116 |
| 62 | 1  | 0 | 5.786686  | -1.745061 | 2.210425  |
| 63 | 1  | 0 | 7.284721  | -2.637304 | 1.846663  |
| 64 | 1  | 0 | 7.345910  | -0.864190 | 2.054409  |
| 65 | 1  | 0 | 7.295304  | -1.585303 | -1.712440 |
| 66 | 1  | 0 | 8.417091  | -1.014211 | -0.450496 |
| 67 | 1  | 0 | 8.020785  | -2.749424 | -0.571624 |

|     |   |   |           |           |           |
|-----|---|---|-----------|-----------|-----------|
| 68  | 1 | 0 | -1.639388 | -0.534940 | 4.933729  |
| 69  | 1 | 0 | -4.064767 | -0.505835 | 4.298404  |
| 70  | 1 | 0 | -3.333586 | -2.112642 | 4.379333  |
| 71  | 1 | 0 | -3.662185 | -1.382539 | 2.810709  |
| 72  | 1 | 0 | 0.130534  | -1.066929 | 3.278847  |
| 73  | 1 | 0 | -0.888312 | -2.461230 | 3.655888  |
| 74  | 1 | 0 | -1.085317 | -1.607723 | 2.124576  |
| 75  | 1 | 0 | -2.859076 | 2.652995  | -0.100707 |
| 76  | 1 | 0 | -4.839599 | 3.350422  | 1.262570  |
| 77  | 1 | 0 | -4.525666 | 4.493417  | -0.052412 |
| 78  | 1 | 0 | -4.058560 | 4.897049  | 1.607245  |
| 79  | 1 | 0 | -0.772117 | 4.082065  | -0.107361 |
| 80  | 1 | 0 | -2.151058 | 4.795127  | -0.968724 |
| 81  | 1 | 0 | -1.701123 | 5.392134  | 0.626247  |
| 82  | 1 | 0 | 1.661688  | -2.222017 | -2.422883 |
| 83  | 1 | 0 | 0.438514  | -2.488906 | -1.158524 |
| 84  | 1 | 0 | 1.513866  | -3.816113 | -1.669674 |
| 85  | 1 | 0 | 3.219358  | -5.412075 | 1.380199  |
| 86  | 1 | 0 | 2.491434  | -5.297755 | -0.243834 |
| 87  | 1 | 0 | 4.152680  | -4.669470 | 0.037942  |
| 88  | 1 | 0 | 0.760617  | 4.690247  | -1.959218 |
| 89  | 1 | 0 | 1.688945  | 6.947585  | -2.360844 |
| 90  | 1 | 0 | 4.023466  | 7.470925  | -1.682139 |
| 91  | 1 | 0 | 5.413542  | 5.723717  | -0.591597 |
| 92  | 1 | 0 | 4.490945  | 3.476780  | -0.181472 |
| 93  | 1 | 0 | -2.899130 | 0.482819  | -4.600043 |
| 94  | 1 | 0 | -5.075507 | 0.485402  | -3.355380 |
| 95  | 1 | 0 | -4.389390 | 2.085341  | -3.656687 |
| 96  | 1 | 0 | -4.298145 | 1.386680  | -2.041415 |
| 97  | 1 | 0 | -1.848966 | 2.428729  | -3.621629 |
| 98  | 1 | 0 | -1.647852 | 1.621067  | -2.058366 |
| 99  | 1 | 0 | -0.760489 | 1.038055  | -3.469078 |
| 100 | 1 | 0 | -2.979269 | -2.631013 | 0.625383  |
| 101 | 1 | 0 | -5.215799 | -3.264863 | -0.331843 |
| 102 | 1 | 0 | -4.691582 | -4.393592 | 0.927910  |
| 103 | 1 | 0 | -4.567353 | -4.845389 | -0.779345 |
| 104 | 1 | 0 | -0.992705 | -4.105007 | 0.348306  |
| 105 | 1 | 0 | -2.253707 | -4.852648 | 1.327640  |
| 106 | 1 | 0 | -2.027816 | -5.377327 | -0.337418 |

Sum of electronic and zero-point Energies= -2590.624339  
Sum of electronic and thermal Energies= -2590.567608  
Sum of electronic and thermal Enthalpies= -2590.566664  
Sum of electronic and thermal Free Energies= -2590.722311

#### A-b1

| Center<br>Number | Atomic<br>Number | Atomic<br>Type | Coordinates (Angstroms) |           |           |
|------------------|------------------|----------------|-------------------------|-----------|-----------|
|                  |                  |                | X                       | Y         | Z         |
| 1                | 6                | 0              | -2.655873               | -0.577555 | 0.766901  |
| 2                | 6                | 0              | -1.478962               | -1.301756 | 0.710832  |
| 3                | 6                | 0              | -2.745372               | 0.870474  | 0.601531  |
| 4                | 7                | 0              | -1.563565               | -2.717565 | 0.847338  |
| 5                | 6                | 0              | -3.877759               | 1.592418  | 0.472662  |
| 6                | 79               | 0              | 0.356692                | -0.431120 | 0.293976  |
| 7                | 6                | 0              | 2.186862                | 0.375612  | -0.259808 |
| 8                | 7                | 0              | 2.636292                | 0.555091  | -1.535525 |
| 9                | 6                | 0              | 3.904655                | 1.123304  | -1.533667 |

|    |    |   |           |           |           |
|----|----|---|-----------|-----------|-----------|
| 10 | 6  | 0 | 4.264886  | 1.279221  | -0.236226 |
| 11 | 7  | 0 | 3.199025  | 0.829292  | 0.535913  |
| 12 | 6  | 0 | 1.864936  | 0.329870  | -2.748043 |
| 13 | 6  | 0 | 3.260491  | 0.713257  | 1.983249  |
| 14 | 6  | 0 | 2.844055  | 1.784628  | 2.806787  |
| 15 | 6  | 0 | 2.943243  | 1.591399  | 4.192248  |
| 16 | 6  | 0 | 3.442945  | 0.414056  | 4.740078  |
| 17 | 6  | 0 | 3.875114  | -0.607050 | 3.903098  |
| 18 | 6  | 0 | 3.798607  | -0.481925 | 2.510033  |
| 19 | 6  | 0 | 1.067876  | 1.400148  | -3.210046 |
| 20 | 6  | 0 | 0.328692  | 1.206497  | -4.383727 |
| 21 | 6  | 0 | 0.380694  | 0.001713  | -5.072939 |
| 22 | 6  | 0 | 1.191891  | -1.027390 | -4.605656 |
| 23 | 6  | 0 | 1.963325  | -0.899198 | -3.441581 |
| 24 | 7  | 0 | -3.842048 | -1.252766 | 0.997917  |
| 25 | 6  | 0 | -5.012960 | -1.354168 | 1.084402  |
| 26 | 7  | 0 | -6.263799 | -1.671626 | 1.019922  |
| 27 | 6  | 0 | -6.812418 | -2.236745 | -0.236761 |
| 28 | 6  | 0 | -7.197019 | -1.398744 | 2.130233  |
| 29 | 6  | 0 | 2.307513  | 3.145700  | 2.347774  |
| 30 | 6  | 0 | 3.261929  | 3.955573  | 1.449214  |
| 31 | 6  | 0 | 0.889395  | 3.081810  | 1.751516  |
| 32 | 6  | 0 | 4.350419  | -1.605216 | 1.634750  |
| 33 | 6  | 0 | 5.892652  | -1.625238 | 1.683773  |
| 34 | 6  | 0 | 3.776032  | -2.983485 | 2.010674  |
| 35 | 6  | 0 | 2.828627  | -2.109416 | -3.067339 |
| 36 | 6  | 0 | 4.339334  | -1.826680 | -2.957788 |
| 37 | 6  | 0 | 2.307735  | -2.889197 | -1.845680 |
| 38 | 6  | 0 | 1.011991  | 2.760486  | -2.518821 |
| 39 | 6  | 0 | -0.432622 | 3.207175  | -2.227779 |
| 40 | 6  | 0 | 1.760414  | 3.826385  | -3.345908 |
| 41 | 6  | 0 | -0.342545 | -3.377557 | 1.362800  |
| 42 | 6  | 0 | -3.985365 | 3.050050  | 0.362766  |
| 43 | 6  | 0 | -5.192180 | 3.611465  | -0.093894 |
| 44 | 6  | 0 | -5.341894 | 4.990361  | -0.226490 |
| 45 | 6  | 0 | -4.287588 | 5.842574  | 0.105331  |
| 46 | 6  | 0 | -3.086568 | 5.302173  | 0.575159  |
| 47 | 6  | 0 | -2.936356 | 3.924720  | 0.706467  |
| 48 | 6  | 0 | -3.141850 | -4.951796 | 0.498064  |
| 49 | 16 | 0 | -2.291771 | -3.658164 | -0.428275 |
| 50 | 8  | 0 | -1.228005 | -4.290977 | -1.210847 |
| 51 | 8  | 0 | -3.310815 | -2.838925 | -1.092889 |
| 52 | 1  | 0 | -1.777504 | 1.362381  | 0.587296  |
| 53 | 1  | 0 | -4.832897 | 1.070678  | 0.414118  |
| 54 | 1  | 0 | 4.426535  | 1.352697  | -2.448062 |
| 55 | 1  | 0 | 5.166290  | 1.666886  | 0.209055  |
| 56 | 1  | 0 | 2.627969  | 2.393924  | 4.852718  |
| 57 | 1  | 0 | 3.510293  | 0.302236  | 5.818114  |
| 58 | 1  | 0 | 4.288885  | -1.513219 | 4.333454  |
| 59 | 1  | 0 | -0.289499 | 2.014212  | -4.761796 |
| 60 | 1  | 0 | -0.199228 | -0.133861 | -5.980921 |
| 61 | 1  | 0 | 1.238487  | -1.960921 | -5.158504 |
| 62 | 1  | 0 | -5.988331 | -2.466831 | -0.912639 |
| 63 | 1  | 0 | -7.361664 | -3.151395 | 0.001757  |
| 64 | 1  | 0 | -7.489752 | -1.513769 | -0.700091 |
| 65 | 1  | 0 | -6.647397 | -0.988191 | 2.976969  |
| 66 | 1  | 0 | -7.954817 | -0.680624 | 1.804555  |
| 67 | 1  | 0 | -7.684212 | -2.330998 | 2.428545  |
| 68 | 1  | 0 | 2.216798  | 3.723827  | 3.274785  |

|     |   |   |           |           |           |
|-----|---|---|-----------|-----------|-----------|
| 69  | 1 | 0 | 2.911105  | 4.990795  | 1.384939  |
| 70  | 1 | 0 | 3.312186  | 3.565606  | 0.429969  |
| 71  | 1 | 0 | 4.276198  | 3.975544  | 1.860692  |
| 72  | 1 | 0 | 0.870108  | 2.552479  | 0.795899  |
| 73  | 1 | 0 | 0.200633  | 2.572088  | 2.432727  |
| 74  | 1 | 0 | 0.514500  | 4.097529  | 1.582806  |
| 75  | 1 | 0 | 4.059665  | -1.412260 | 0.599209  |
| 76  | 1 | 0 | 6.318767  | -0.668145 | 1.366949  |
| 77  | 1 | 0 | 6.286009  | -2.405402 | 1.023947  |
| 78  | 1 | 0 | 6.253512  | -1.829379 | 2.697242  |
| 79  | 1 | 0 | 2.682446  | -2.978685 | 1.984333  |
| 80  | 1 | 0 | 4.130922  | -3.741833 | 1.305553  |
| 81  | 1 | 0 | 4.087561  | -3.298272 | 3.011641  |
| 82  | 1 | 0 | 2.720344  | -2.787566 | -3.921693 |
| 83  | 1 | 0 | 4.701396  | -1.245776 | -3.812418 |
| 84  | 1 | 0 | 4.886372  | -2.775101 | -2.947920 |
| 85  | 1 | 0 | 4.603049  | -1.291113 | -2.042615 |
| 86  | 1 | 0 | 2.889276  | -3.809614 | -1.720810 |
| 87  | 1 | 0 | 2.398955  | -2.307756 | -0.924365 |
| 88  | 1 | 0 | 1.257075  | -3.167915 | -1.968202 |
| 89  | 1 | 0 | 1.521985  | 2.680763  | -1.555171 |
| 90  | 1 | 0 | -0.979479 | 2.449279  | -1.659388 |
| 91  | 1 | 0 | -0.432360 | 4.135387  | -1.647728 |
| 92  | 1 | 0 | -0.992765 | 3.400751  | -3.147979 |
| 93  | 1 | 0 | 2.805142  | 3.546144  | -3.514337 |
| 94  | 1 | 0 | 1.747994  | 4.791048  | -2.827899 |
| 95  | 1 | 0 | 1.292944  | 3.966746  | -4.326050 |
| 96  | 1 | 0 | -0.565784 | -4.415117 | 1.620373  |
| 97  | 1 | 0 | -0.049784 | -2.859004 | 2.275536  |
| 98  | 1 | 0 | 0.478791  | -3.357859 | 0.641746  |
| 99  | 1 | 0 | -6.017061 | 2.953793  | -0.358025 |
| 100 | 1 | 0 | -6.281177 | 5.399495  | -0.586549 |
| 101 | 1 | 0 | -4.402140 | 6.917857  | 0.008794  |
| 102 | 1 | 0 | -2.268403 | 5.960810  | 0.852320  |
| 103 | 1 | 0 | -2.007281 | 3.524912  | 1.099961  |
| 104 | 1 | 0 | -3.874754 | -4.489894 | 1.158740  |
| 105 | 1 | 0 | -3.628176 | -5.584613 | -0.247028 |
| 106 | 1 | 0 | -2.420718 | -5.539101 | 1.065513  |

Sum of electronic and zero-point Energies= -2590.622605  
Sum of electronic and thermal Energies= -2590.565812  
Sum of electronic and thermal Enthalpies= -2590.564867  
Sum of electronic and thermal Free Energies= -2590.721302

#### A-tsa2

| Center<br>Number | Atomic<br>Number | Atomic<br>Type | Coordinates (Angstroms) |           |           |
|------------------|------------------|----------------|-------------------------|-----------|-----------|
|                  |                  |                | X                       | Y         | Z         |
| 1                | 6                | 0              | -1.605064               | -0.098132 | -1.002820 |
| 2                | 6                | 0              | -2.426111               | -1.203731 | -0.926180 |
| 3                | 6                | 0              | -2.141253               | 1.079476  | -1.589243 |
| 4                | 7                | 0              | -2.028803               | -2.504235 | -0.541566 |
| 5                | 6                | 0              | -3.346940               | 1.724990  | -1.311505 |
| 6                | 79               | 0              | 0.397640                | 0.062134  | -0.471874 |
| 7                | 6                | 0              | 2.344638                | 0.339400  | 0.155092  |
| 8                | 7                | 0              | 3.233352                | -0.600738 | 0.587271  |
| 9                | 6                | 0              | 4.439382                | -0.007158 | 0.942482  |
| 10               | 6                | 0              | 4.293447                | 1.327010  | 0.751455  |

|    |    |   |            |            |            |
|----|----|---|------------|------------|------------|
| 11 | 7  | 0 | 3. 010437  | 1. 525938  | 0. 254414  |
| 12 | 6  | 0 | 3. 036623  | -2. 039671 | 0. 542785  |
| 13 | 6  | 0 | 2. 432498  | 2. 841155  | 0. 035427  |
| 14 | 6  | 0 | 1. 764020  | 3. 438863  | 1. 126122  |
| 15 | 6  | 0 | 1. 214589  | 4. 713633  | 0. 937180  |
| 16 | 6  | 0 | 1. 330980  | 5. 371710  | -0. 280513 |
| 17 | 6  | 0 | 2. 011228  | 4. 764810  | -1. 332252 |
| 18 | 6  | 0 | 2. 584864  | 3. 490862  | -1. 211892 |
| 19 | 6  | 0 | 3. 379638  | -2. 695808 | -0. 660310 |
| 20 | 6  | 0 | 3. 210918  | -4. 085278 | -0. 718916 |
| 21 | 6  | 0 | 2. 730620  | -4. 795928 | 0. 374431  |
| 22 | 6  | 0 | 2. 419995  | -4. 124975 | 1. 553235  |
| 23 | 6  | 0 | 2. 566103  | -2. 735458 | 1. 681553  |
| 24 | 7  | 0 | -3. 712434 | -1. 193792 | -1. 431893 |
| 25 | 6  | 0 | -4. 436845 | -0. 231292 | -1. 744032 |
| 26 | 7  | 0 | -5. 721541 | 0. 020149  | -1. 754570 |
| 27 | 6  | 0 | -6. 618520 | -0. 609065 | -0. 765319 |
| 28 | 6  | 0 | -6. 317512 | 1. 010910  | -2. 652082 |
| 29 | 1  | 0 | -3. 595951 | 2. 506625  | -2. 028799 |
| 30 | 6  | 0 | 3. 303215  | 2. 949849  | -2. 454443 |
| 31 | 6  | 0 | 4. 784017  | 2. 574298  | -2. 255358 |
| 32 | 6  | 0 | 2. 525426  | 1. 825903  | -3. 165217 |
| 33 | 6  | 0 | -4. 051161 | 1. 916377  | -0. 023472 |
| 34 | 6  | 0 | -4. 964676 | 2. 987808  | 0. 047702  |
| 35 | 6  | 0 | -5. 654048 | 3. 270343  | 1. 225371  |
| 36 | 6  | 0 | -5. 444597 | 2. 483999  | 2. 359929  |
| 37 | 6  | 0 | -4. 539544 | 1. 420170  | 2. 305613  |
| 38 | 6  | 0 | -3. 847273 | 1. 135552  | 1. 130673  |
| 39 | 6  | 0 | -3. 805423 | -4. 569751 | -0. 143795 |
| 40 | 16 | 0 | -2. 919506 | -3. 255716 | 0. 708667  |
| 41 | 8  | 0 | -3. 900966 | -2. 277688 | 1. 193483  |
| 42 | 8  | 0 | -1. 956433 | -3. 874302 | 1. 621063  |
| 43 | 6  | 0 | -0. 692576 | -3. 056857 | -0. 813810 |
| 44 | 6  | 0 | 2. 181034  | -2. 139018 | 3. 041706  |
| 45 | 6  | 0 | 0. 804046  | -1. 446604 | 3. 022964  |
| 46 | 6  | 0 | 3. 249552  | -1. 261091 | 3. 718900  |
| 47 | 6  | 0 | 3. 952282  | -1. 972495 | -1. 877592 |
| 48 | 6  | 0 | 5. 408193  | -2. 405727 | -2. 145148 |
| 49 | 6  | 0 | 3. 077014  | -2. 173311 | -3. 129567 |
| 50 | 6  | 0 | 1. 642346  | 2. 781097  | 2. 498797  |
| 51 | 6  | 0 | 2. 457497  | 3. 554048  | 3. 555752  |
| 52 | 6  | 0 | 0. 172777  | 2. 629079  | 2. 935645  |
| 53 | 1  | 0 | -1. 564794 | 1. 510122  | -2. 410039 |
| 54 | 1  | 0 | 5. 274278  | -0. 586257 | 1. 301324  |
| 55 | 1  | 0 | 4. 973777  | 2. 146494  | 0. 915045  |
| 56 | 1  | 0 | 0. 698108  | 5. 196098  | 1. 760783  |
| 57 | 1  | 0 | 0. 905007  | 6. 362356  | -0. 409056 |
| 58 | 1  | 0 | 2. 110953  | 5. 292189  | -2. 276559 |
| 59 | 1  | 0 | 3. 471898  | -4. 613931 | -1. 630313 |
| 60 | 1  | 0 | 2. 610863  | -5. 873700 | 0. 315938  |
| 61 | 1  | 0 | 2. 054505  | -4. 688624 | 2. 406318  |
| 62 | 1  | 0 | -7. 052677 | 0. 168354  | -0. 129119 |
| 63 | 1  | 0 | -7. 419545 | -1. 138855 | -1. 290058 |
| 64 | 1  | 0 | -6. 045124 | -1. 301539 | -0. 150385 |
| 65 | 1  | 0 | -5. 572097 | 1. 350839  | -3. 369952 |
| 66 | 1  | 0 | -7. 149378 | 0. 549139  | -3. 192334 |
| 67 | 1  | 0 | -6. 694567 | 1. 863111  | -2. 078386 |
| 68 | 1  | 0 | 3. 308803  | 3. 797313  | -3. 149895 |
| 69 | 1  | 0 | 5. 327117  | 3. 359547  | -1. 719601 |

|     |   |   |           |           |           |
|-----|---|---|-----------|-----------|-----------|
| 70  | 1 | 0 | 5.261580  | 2.451120  | -3.232813 |
| 71  | 1 | 0 | 4.911945  | 1.635830  | -1.711082 |
| 72  | 1 | 0 | 1.499737  | 2.137628  | -3.386954 |
| 73  | 1 | 0 | 3.014082  | 1.576019  | -4.113273 |
| 74  | 1 | 0 | 2.473914  | 0.916231  | -2.562277 |
| 75  | 1 | 0 | -5.114003 | 3.619743  | -0.824431 |
| 76  | 1 | 0 | -6.344969 | 4.107249  | 1.258754  |
| 77  | 1 | 0 | -5.978935 | 2.699898  | 3.280050  |
| 78  | 1 | 0 | -4.372353 | 0.801130  | 3.181530  |
| 79  | 1 | 0 | -3.161865 | 0.298037  | 1.116624  |
| 80  | 1 | 0 | -3.082619 | -5.241591 | -0.608234 |
| 81  | 1 | 0 | -4.385428 | -5.104982 | 0.610380  |
| 82  | 1 | 0 | -4.455285 | -4.115326 | -0.891266 |
| 83  | 1 | 0 | -0.364483 | -2.671402 | -1.779428 |
| 84  | 1 | 0 | -0.764366 | -4.145470 | -0.879984 |
| 85  | 1 | 0 | 0.041952  | -2.804869 | -0.047638 |
| 86  | 1 | 0 | 2.067770  | -3.013807 | 3.692480  |
| 87  | 1 | 0 | 0.527896  | -1.144146 | 4.039163  |
| 88  | 1 | 0 | 0.807165  | -0.550750 | 2.395342  |
| 89  | 1 | 0 | 0.027227  | -2.121593 | 2.651368  |
| 90  | 1 | 0 | 4.235984  | -1.735831 | 3.694352  |
| 91  | 1 | 0 | 2.981160  | -1.115098 | 4.770155  |
| 92  | 1 | 0 | 3.333952  | -0.270689 | 3.266013  |
| 93  | 1 | 0 | 3.969177  | -0.899847 | -1.669316 |
| 94  | 1 | 0 | 6.045681  | -2.230399 | -1.272833 |
| 95  | 1 | 0 | 5.823806  | -1.842992 | -2.987272 |
| 96  | 1 | 0 | 5.470949  | -3.470221 | -2.393002 |
| 97  | 1 | 0 | 2.053446  | -1.824964 | -2.957393 |
| 98  | 1 | 0 | 3.489393  | -1.610265 | -3.973044 |
| 99  | 1 | 0 | 3.031468  | -3.225661 | -3.427969 |
| 100 | 1 | 0 | 2.062284  | 1.773939  | 2.440482  |
| 101 | 1 | 0 | 3.512290  | 3.630584  | 3.273184  |
| 102 | 1 | 0 | 2.402231  | 3.046808  | 4.524386  |
| 103 | 1 | 0 | 2.075583  | 4.571285  | 3.690234  |
| 104 | 1 | 0 | -0.314785 | 3.600736  | 3.064731  |
| 105 | 1 | 0 | -0.402953 | 2.058070  | 2.200608  |
| 106 | 1 | 0 | 0.118471  | 2.103907  | 3.894757  |

Sum of electronic and zero-point Energies= -2590.608193  
Sum of electronic and thermal Energies= -2590.552825  
Sum of electronic and thermal Enthalpies= -2590.551881  
Sum of electronic and thermal Free Energies= -2590.703645

#### A-tsb2

| Center<br>Number | Atomic<br>Number | Atomic<br>Type | Coordinates (Angstroms) |           |           |
|------------------|------------------|----------------|-------------------------|-----------|-----------|
|                  |                  |                | X                       | Y         | Z         |
| 1                | 6                | 0              | 2.496267                | 1.597435  | -0.380301 |
| 2                | 6                | 0              | 1.121248                | 2.023718  | -0.463312 |
| 3                | 6                | 0              | 2.845791                | 0.258657  | -0.038014 |
| 4                | 7                | 0              | 0.834031                | 3.297137  | -0.788150 |
| 5                | 6                | 0              | 4.173312                | -0.134475 | -0.023907 |
| 6                | 79               | 0              | -0.365669               | 0.554450  | -0.205729 |
| 7                | 6                | 0              | -1.751402               | -0.971418 | 0.026195  |
| 8                | 7                | 0              | -2.587674               | -1.150197 | 1.092045  |
| 9                | 6                | 0              | -3.347158               | -2.302470 | 0.932312  |
| 10               | 6                | 0              | -2.972742               | -2.862609 | -0.242616 |
| 11               | 7                | 0              | -2.003842               | -2.033617 | -0.796812 |

|    |    |   |           |           |           |
|----|----|---|-----------|-----------|-----------|
| 12 | 6  | 0 | -2.810251 | -0.212719 | 2.183256  |
| 13 | 6  | 0 | -1.298982 | -2.378950 | -2.021395 |
| 14 | 6  | 0 | -0.159541 | -3.205432 | -1.899121 |
| 15 | 6  | 0 | 0.514843  | -3.567772 | -3.072059 |
| 16 | 6  | 0 | 0.071147  | -3.140438 | -4.317179 |
| 17 | 6  | 0 | -1.075198 | -2.358223 | -4.410119 |
| 18 | 6  | 0 | -1.801319 | -1.963774 | -3.276783 |
| 19 | 6  | 0 | -2.081224 | -0.330587 | 3.388948  |
| 20 | 6  | 0 | -2.365082 | 0.608926  | 4.390588  |
| 21 | 6  | 0 | -3.331332 | 1.595760  | 4.225092  |
| 22 | 6  | 0 | -4.060405 | 1.656838  | 3.044487  |
| 23 | 6  | 0 | -3.822059 | 0.756110  | 1.999598  |
| 24 | 7  | 0 | 3.531548  | 2.492328  | -0.390079 |
| 25 | 6  | 0 | 4.686607  | 2.174592  | 0.028423  |
| 26 | 7  | 0 | 5.903465  | 2.543452  | -0.296527 |
| 27 | 6  | 0 | 6.241941  | 3.139980  | -1.598699 |
| 28 | 6  | 0 | 7.022571  | 2.291244  | 0.616412  |
| 29 | 1  | 0 | 4.808610  | 0.226605  | -0.829044 |
| 30 | 6  | 0 | -3.067475 | -1.139622 | -3.541273 |
| 31 | 6  | 0 | -4.376364 | -1.736773 | -2.990494 |
| 32 | 6  | 0 | -2.918109 | 0.343512  | -3.159376 |
| 33 | 6  | 0 | -4.701151 | 0.815175  | 0.751705  |
| 34 | 6  | 0 | -6.076129 | 0.168680  | 1.025766  |
| 35 | 6  | 0 | -4.880583 | 2.246336  | 0.212344  |
| 36 | 6  | 0 | -1.038031 | -1.399015 | 3.739221  |
| 37 | 6  | 0 | -1.562570 | -2.847748 | 3.702112  |
| 38 | 6  | 0 | 0.290497  | -1.262841 | 2.974403  |
| 39 | 6  | 0 | 0.316955  | -3.771144 | -0.563142 |
| 40 | 6  | 0 | -0.159320 | -5.229745 | -0.390994 |
| 41 | 6  | 0 | 1.843428  | -3.684660 | -0.389066 |
| 42 | 6  | 0 | 4.718272  | -1.271918 | 0.721422  |
| 43 | 6  | 0 | 4.153943  | -1.697437 | 1.939512  |
| 44 | 6  | 0 | 4.690798  | -2.781056 | 2.630014  |
| 45 | 6  | 0 | 5.808015  | -3.454335 | 2.126835  |
| 46 | 6  | 0 | 6.388845  | -3.033166 | 0.928216  |
| 47 | 6  | 0 | 5.852151  | -1.950304 | 0.235843  |
| 48 | 6  | 0 | -1.601252 | 3.683211  | -2.099185 |
| 49 | 16 | 0 | -0.812013 | 3.958715  | -0.507467 |
| 50 | 8  | 0 | -0.604792 | 5.389761  | -0.316535 |
| 51 | 8  | 0 | -1.462676 | 3.147693  | 0.515365  |
| 52 | 6  | 0 | 1.753745  | 4.337506  | -1.317390 |
| 53 | 1  | 0 | 2.067801  | -0.387988 | 0.354342  |
| 54 | 1  | 0 | -4.072457 | -2.610808 | 1.666871  |
| 55 | 1  | 0 | -3.306000 | -3.757765 | -0.740822 |
| 56 | 1  | 0 | 1.392077  | -4.202212 | -3.006091 |
| 57 | 1  | 0 | 0.604402  | -3.432298 | -5.216971 |
| 58 | 1  | 0 | -1.432298 | -2.051282 | -5.388879 |
| 59 | 1  | 0 | -1.818406 | 0.551329  | 5.327287  |
| 60 | 1  | 0 | -3.525733 | 2.305016  | 5.023864  |
| 61 | 1  | 0 | -4.829451 | 2.413005  | 2.929902  |
| 62 | 1  | 0 | 6.778626  | 4.080793  | -1.441656 |
| 63 | 1  | 0 | 6.882982  | 2.461746  | -2.172827 |
| 64 | 1  | 0 | 5.325151  | 3.335014  | -2.153389 |
| 65 | 1  | 0 | 7.528768  | 3.232767  | 0.852669  |
| 66 | 1  | 0 | 6.640406  | 1.842823  | 1.532446  |
| 67 | 1  | 0 | 7.744524  | 1.610239  | 0.152843  |
| 68 | 1  | 0 | -3.175431 | -1.158053 | -4.631900 |
| 69 | 1  | 0 | -4.462824 | -2.800255 | -3.235027 |
| 70 | 1  | 0 | -5.229243 | -1.223532 | -3.446473 |



|     |   |   |           |           |           |
|-----|---|---|-----------|-----------|-----------|
| 71  | 1 | 0 | -4.470092 | -1.624531 | -1.908123 |
| 72  | 1 | 0 | -2.036703 | 0.775674  | -3.644923 |
| 73  | 1 | 0 | -3.798859 | 0.906424  | -3.487855 |
| 74  | 1 | 0 | -2.813261 | 0.475673  | -2.079250 |
| 75  | 1 | 0 | -4.216225 | 0.235155  | -0.038559 |
| 76  | 1 | 0 | -5.981567 | -0.872298 | 1.349804  |
| 77  | 1 | 0 | -6.694703 | 0.185667  | 0.122277  |
| 78  | 1 | 0 | -6.612673 | 0.712192  | 1.810412  |
| 79  | 1 | 0 | -3.916240 | 2.744484  | 0.088293  |
| 80  | 1 | 0 | -5.395065 | 2.216410  | -0.754111 |
| 81  | 1 | 0 | -5.492023 | 2.860605  | 0.880852  |
| 82  | 1 | 0 | -0.797330 | -1.201139 | 4.790139  |
| 83  | 1 | 0 | -2.515505 | -2.939802 | 4.232831  |
| 84  | 1 | 0 | -0.843811 | -3.510395 | 4.195438  |
| 85  | 1 | 0 | -1.699618 | -3.218256 | 2.683184  |
| 86  | 1 | 0 | 0.683425  | -0.243774 | 3.046165  |
| 87  | 1 | 0 | 1.032352  | -1.948002 | 3.399738  |
| 88  | 1 | 0 | 0.180002  | -1.507345 | 1.915115  |
| 89  | 1 | 0 | -0.132542 | -3.180824 | 0.240129  |
| 90  | 1 | 0 | -1.248935 | -5.313412 | -0.444679 |
| 91  | 1 | 0 | 0.161362  | -5.624177 | 0.578780  |
| 92  | 1 | 0 | 0.261975  | -5.872104 | -1.171410 |
| 93  | 1 | 0 | 2.216532  | -2.675774 | -0.583021 |
| 94  | 1 | 0 | 2.122144  | -3.959262 | 0.632526  |
| 95  | 1 | 0 | 2.370667  | -4.370178 | -1.060148 |
| 96  | 1 | 0 | 3.308112  | -1.157187 | 2.353910  |
| 97  | 1 | 0 | 4.248796  | -3.092745 | 3.571913  |
| 98  | 1 | 0 | 6.229376  | -4.293867 | 2.671239  |
| 99  | 1 | 0 | 7.259834  | -3.548450 | 0.534577  |
| 100 | 1 | 0 | 6.304648  | -1.630548 | -0.699889 |
| 101 | 1 | 0 | -1.642662 | 2.611553  | -2.288186 |
| 102 | 1 | 0 | -2.605884 | 4.103667  | -2.019946 |
| 103 | 1 | 0 | -1.032934 | 4.208012  | -2.868068 |
| 104 | 1 | 0 | 2.464297  | 3.858863  | -1.987464 |
| 105 | 1 | 0 | 2.293417  | 4.835090  | -0.512960 |
| 106 | 1 | 0 | 1.169141  | 5.080801  | -1.857475 |

Sum of electronic and zero-point Energies= -2590.612537  
Sum of electronic and thermal Energies= -2590.557222  
Sum of electronic and thermal Enthalpies= -2590.556278  
Sum of electronic and thermal Free Energies= -2590.707648

#### A-a2

| Center<br>Number | Atomic<br>Number | Atomic<br>Type | Coordinates (Angstroms) |           |           |
|------------------|------------------|----------------|-------------------------|-----------|-----------|
|                  |                  |                | X                       | Y         | Z         |
| 1                | 6                | 0              | -1.637703               | 0.220533  | -0.232866 |
| 2                | 6                | 0              | -2.613536               | -0.876764 | -0.368239 |
| 3                | 6                | 0              | -2.226717               | 1.437621  | -0.337353 |
| 4                | 7                | 0              | -2.387994               | -2.098910 | 0.175919  |
| 5                | 6                | 0              | -3.691956               | 1.678808  | -0.623887 |
| 6                | 79               | 0              | 0.434944                | 0.124917  | -0.080381 |
| 7                | 6                | 0              | 2.496325                | 0.146418  | 0.002035  |
| 8                | 7                | 0              | 3.330090                | -0.848324 | 0.425398  |
| 9                | 6                | 0              | 4.659884                | -0.455589 | 0.314570  |
| 10               | 6                | 0              | 4.656475                | 0.813689  | -0.160813 |
| 11               | 7                | 0              | 3.326377                | 1.166440  | -0.362604 |
| 12               | 6                | 0              | 2.919626                | -2.191196 | 0.795707  |

|    |    |   |            |            |            |
|----|----|---|------------|------------|------------|
| 13 | 6  | 0 | 2. 905308  | 2. 500708  | -0. 755364 |
| 14 | 6  | 0 | 2. 667769  | 3. 430682  | 0. 280265  |
| 15 | 6  | 0 | 2. 275513  | 4. 726464  | -0. 080389 |
| 16 | 6  | 0 | 2. 134240  | 5. 088080  | -1. 414012 |
| 17 | 6  | 0 | 2. 394561  | 4. 155660  | -2. 413928 |
| 18 | 6  | 0 | 2. 790405  | 2. 842075  | -2. 123522 |
| 19 | 6  | 0 | 2. 780337  | -3. 132387 | -0. 248423 |
| 20 | 6  | 0 | 2. 385180  | -4. 433478 | 0. 090090  |
| 21 | 6  | 0 | 2. 148432  | -4. 790374 | 1. 411856  |
| 22 | 6  | 0 | 2. 318823  | -3. 848557 | 2. 422490  |
| 23 | 6  | 0 | 2. 713187  | -2. 529142 | 2. 154283  |
| 24 | 7  | 0 | -3. 769747 | -0. 759722 | -1. 051203 |
| 25 | 6  | 0 | -4. 313445 | 0. 436896  | -1. 222130 |
| 26 | 7  | 0 | -5. 461493 | 0. 515566  | -1. 906317 |
| 27 | 6  | 0 | -6. 054471 | -0. 706398 | -2. 466211 |
| 28 | 6  | 0 | -6. 123625 | 1. 790176  | -2. 199427 |
| 29 | 1  | 0 | -3. 737141 | 2. 478047  | -1. 374045 |
| 30 | 6  | 0 | 3. 046092  | 1. 929048  | -3. 329206 |
| 31 | 6  | 0 | 4. 458636  | 1. 319332  | -3. 410353 |
| 32 | 6  | 0 | 1. 956035  | 0. 858771  | -3. 525671 |
| 33 | 6  | 0 | -4. 426614 | 2. 186417  | 0. 629213  |
| 34 | 6  | 0 | -4. 518470 | 3. 565456  | 0. 857598  |
| 35 | 6  | 0 | -5. 134985 | 4. 051279  | 2. 011957  |
| 36 | 6  | 0 | -5. 667517 | 3. 162591  | 2. 946697  |
| 37 | 6  | 0 | -5. 580485 | 1. 786983  | 2. 722310  |
| 38 | 6  | 0 | -4. 961326 | 1. 297238  | 1. 571798  |
| 39 | 6  | 0 | -3. 681133 | -3. 796174 | -1. 646586 |
| 40 | 16 | 0 | -3. 660712 | -3. 374297 | 0. 100295  |
| 41 | 8  | 0 | -4. 937755 | -2. 807269 | 0. 519597  |
| 42 | 8  | 0 | -3. 075248 | -4. 497143 | 0. 826476  |
| 43 | 6  | 0 | -1. 229344 | -2. 411683 | 1. 033551  |
| 44 | 6  | 0 | 2. 870623  | -1. 608483 | 3. 371542  |
| 45 | 6  | 0 | 1. 733621  | -0. 578174 | 3. 507317  |
| 46 | 6  | 0 | 4. 253354  | -0. 947979 | 3. 530259  |
| 47 | 6  | 0 | 3. 073263  | -2. 810051 | -1. 712257 |
| 48 | 6  | 0 | 4. 297483  | -3. 600343 | -2. 217979 |
| 49 | 6  | 0 | 1. 846737  | -3. 055437 | -2. 611823 |
| 50 | 6  | 0 | 2. 848329  | 3. 103716  | 1. 760913  |
| 51 | 6  | 0 | 4. 015256  | 3. 909357  | 2. 367675  |
| 52 | 6  | 0 | 1. 549051  | 3. 324224  | 2. 559132  |
| 53 | 1  | 0 | -1. 642727 | 2. 344179  | -0. 203893 |
| 54 | 1  | 0 | 5. 471706  | -1. 108987 | 0. 588770  |
| 55 | 1  | 0 | 5. 464702  | 1. 492692  | -0. 377430 |
| 56 | 1  | 0 | 2. 090380  | 5. 460530  | 0. 697369  |
| 57 | 1  | 0 | 1. 836031  | 6. 098481  | -1. 677748 |
| 58 | 1  | 0 | 2. 297364  | 4. 450495  | -3. 454773 |
| 59 | 1  | 0 | 2. 274954  | -5. 176179 | -0. 693750 |
| 60 | 1  | 0 | 1. 846843  | -5. 803827 | 1. 659042  |
| 61 | 1  | 0 | 2. 151369  | -4. 140719 | 3. 455102  |
| 62 | 1  | 0 | -7. 090627 | -0. 500293 | -2. 733428 |
| 63 | 1  | 0 | -5. 516078 | -1. 029478 | -3. 363877 |
| 64 | 1  | 0 | -6. 018871 | -1. 500678 | -1. 720026 |
| 65 | 1  | 0 | -5. 991685 | 2. 495212  | -1. 380239 |
| 66 | 1  | 0 | -5. 745467 | 2. 229427  | -3. 130604 |
| 67 | 1  | 0 | -7. 192852 | 1. 608843  | -2. 313681 |
| 68 | 1  | 0 | 2. 968320  | 2. 599649  | -4. 193010 |
| 69 | 1  | 0 | 5. 231395  | 2. 074988  | -3. 235836 |
| 70 | 1  | 0 | 4. 619553  | 0. 908344  | -4. 412326 |
| 71 | 1  | 0 | 4. 607604  | 0. 504850  | -2. 697696 |

|     |   |   |           |           |           |
|-----|---|---|-----------|-----------|-----------|
| 72  | 1 | 0 | 0.959887  | 1.311247  | -3.553292 |
| 73  | 1 | 0 | 2.116997  | 0.333824  | -4.473774 |
| 74  | 1 | 0 | 1.959892  | 0.117318  | -2.723494 |
| 75  | 1 | 0 | -4.106554 | 4.263199  | 0.132080  |
| 76  | 1 | 0 | -5.201858 | 5.122512  | 2.175933  |
| 77  | 1 | 0 | -6.151176 | 3.538997  | 3.842680  |
| 78  | 1 | 0 | -5.997656 | 1.089921  | 3.442665  |
| 79  | 1 | 0 | -4.910206 | 0.223660  | 1.410691  |
| 80  | 1 | 0 | -2.701904 | -4.199772 | -1.904937 |
| 81  | 1 | 0 | -4.450337 | -4.564006 | -1.755377 |
| 82  | 1 | 0 | -3.922866 | -2.903739 | -2.218743 |
| 83  | 1 | 0 | -0.322699 | -2.507363 | 0.433470  |
| 84  | 1 | 0 | -1.429067 | -3.355243 | 1.536415  |
| 85  | 1 | 0 | -1.095843 | -1.622567 | 1.772801  |
| 86  | 1 | 0 | 2.770074  | -2.282410 | 4.230300  |
| 87  | 1 | 0 | 1.840635  | -0.027005 | 4.447803  |
| 88  | 1 | 0 | 1.733087  | 0.145337  | 2.688723  |
| 89  | 1 | 0 | 0.755928  | -1.070272 | 3.518818  |
| 90  | 1 | 0 | 5.061924  | -1.672948 | 3.391400  |
| 91  | 1 | 0 | 4.345443  | -0.541644 | 4.542624  |
| 92  | 1 | 0 | 4.409111  | -0.121346 | 2.833504  |
| 93  | 1 | 0 | 3.319865  | -1.748565 | -1.792128 |
| 94  | 1 | 0 | 5.183081  | -3.402174 | -1.606126 |
| 95  | 1 | 0 | 4.529885  | -3.321328 | -3.250785 |
| 96  | 1 | 0 | 4.115192  | -4.679662 | -2.197644 |
| 97  | 1 | 0 | 0.989826  | -2.458893 | -2.281729 |
| 98  | 1 | 0 | 2.075161  | -2.777425 | -3.645746 |
| 99  | 1 | 0 | 1.549984  | -4.109437 | -2.612516 |
| 100 | 1 | 0 | 3.104831  | 2.045618  | 1.854625  |
| 101 | 1 | 0 | 4.951293  | 3.727526  | 1.830111  |
| 102 | 1 | 0 | 4.166214  | 3.629491  | 3.415285  |
| 103 | 1 | 0 | 3.818518  | 4.985870  | 2.336225  |
| 104 | 1 | 0 | 1.239409  | 4.374254  | 2.546815  |
| 105 | 1 | 0 | 0.728301  | 2.724180  | 2.153428  |
| 106 | 1 | 0 | 1.695758  | 3.037441  | 3.605461  |

Sum of electronic and zero-point Energies= -2590.682825  
Sum of electronic and thermal Energies= -2590.627776  
Sum of electronic and thermal Enthalpies= -2590.626831  
Sum of electronic and thermal Free Energies= -2590.779397

#### A-b2

| Center<br>Number | Atomic<br>Number | Atomic<br>Type | Coordinates (Angstroms) |           |           |
|------------------|------------------|----------------|-------------------------|-----------|-----------|
|                  |                  |                | X                       | Y         | Z         |
| 1                | 6                | 0              | 2.300463                | -1.783446 | 0.323698  |
| 2                | 6                | 0              | 0.874881                | -2.135004 | 0.374172  |
| 3                | 6                | 0              | 2.737242                | -0.526224 | 0.630154  |
| 4                | 7                | 0              | 0.498320                | -3.401985 | 0.487485  |
| 5                | 6                | 0              | 4.244006                | -0.532645 | 0.582696  |
| 6                | 79               | 0              | -0.452756               | -0.523288 | 0.184172  |
| 7                | 6                | 0              | -1.666947               | 1.138082  | -0.030032 |
| 8                | 7                | 0              | -2.789038               | 1.281735  | -0.792698 |
| 9                | 6                | 0              | -3.307165               | 2.564736  | -0.661921 |
| 10               | 6                | 0              | -2.489832               | 3.239648  | 0.182553  |
| 11               | 7                | 0              | -1.494371               | 2.351825  | 0.572371  |
| 12               | 6                | 0              | -3.475268               | 0.238613  | -1.541058 |
| 13               | 6                | 0              | -0.335675               | 2.745451  | 1.353740  |

|    |    |   |           |           |           |
|----|----|---|-----------|-----------|-----------|
| 14 | 6  | 0 | 0.754874  | 3.295533  | 0.643838  |
| 15 | 6  | 0 | 1.892729  | 3.660966  | 1.375633  |
| 16 | 6  | 0 | 1.937878  | 3.503179  | 2.755805  |
| 17 | 6  | 0 | 0.831480  | 2.996984  | 3.432238  |
| 18 | 6  | 0 | -0.338563 | 2.611877  | 2.761416  |
| 19 | 6  | 0 | -3.153582 | -0.000542 | -2.896772 |
| 20 | 6  | 0 | -3.883415 | -1.006012 | -3.547175 |
| 21 | 6  | 0 | -4.889986 | -1.721162 | -2.906908 |
| 22 | 6  | 0 | -5.203926 | -1.437084 | -1.584182 |
| 23 | 6  | 0 | -4.507389 | -0.454143 | -0.871446 |
| 24 | 7  | 0 | 3.362360  | -2.671117 | 0.035948  |
| 25 | 6  | 0 | 4.478227  | -1.990480 | 0.165065  |
| 26 | 7  | 0 | 5.691463  | -2.529634 | -0.071656 |
| 27 | 6  | 0 | 5.780118  | -3.937058 | -0.455181 |
| 28 | 6  | 0 | 6.940273  | -1.893019 | 0.331644  |
| 29 | 1  | 0 | 4.636245  | -0.379943 | 1.599162  |
| 30 | 6  | 0 | -1.498329 | 2.122891  | 3.638182  |
| 31 | 6  | 0 | -2.796257 | 2.942679  | 3.504379  |
| 32 | 6  | 0 | -1.775075 | 0.611308  | 3.533686  |
| 33 | 6  | 0 | -4.922870 | -0.146453 | 0.565738  |
| 34 | 6  | 0 | -6.251520 | 0.637340  | 0.599492  |
| 35 | 6  | 0 | -5.021625 | -1.416553 | 1.431027  |
| 36 | 6  | 0 | -2.107566 | 0.732413  | -3.746242 |
| 37 | 6  | 0 | -2.281979 | 2.260851  | -3.825114 |
| 38 | 6  | 0 | -0.654657 | 0.342429  | -3.415134 |
| 39 | 6  | 0 | 0.718550  | 3.568465  | -0.858784 |
| 40 | 6  | 0 | 0.632505  | 5.085683  | -1.128329 |
| 41 | 6  | 0 | 1.910525  | 2.946400  | -1.606388 |
| 42 | 6  | 0 | 4.836855  | 0.536753  | -0.330175 |
| 43 | 6  | 0 | 4.774019  | 0.402463  | -1.724193 |
| 44 | 6  | 0 | 5.307934  | 1.389911  | -2.552312 |
| 45 | 6  | 0 | 5.906825  | 2.524540  | -1.999205 |
| 46 | 6  | 0 | 5.967685  | 2.667770  | -0.611964 |
| 47 | 6  | 0 | 5.434153  | 1.678916  | 0.217742  |
| 48 | 6  | 0 | -1.546054 | -3.384932 | 2.383797  |
| 49 | 16 | 0 | -1.270754 | -3.813851 | 0.656888  |
| 50 | 8  | 0 | -1.324224 | -5.262668 | 0.508128  |
| 51 | 8  | 0 | -2.043167 | -2.931978 | -0.211065 |
| 52 | 6  | 0 | 1.334248  | -4.627827 | 0.587252  |
| 53 | 1  | 0 | 2.137386  | 0.336872  | 0.882406  |
| 54 | 1  | 0 | -4.196838 | 2.872170  | -1.186311 |
| 55 | 1  | 0 | -2.519265 | 4.255686  | 0.540243  |
| 56 | 1  | 0 | 2.745718  | 4.083284  | 0.854585  |
| 57 | 1  | 0 | 2.824098  | 3.797078  | 3.310658  |
| 58 | 1  | 0 | 0.863966  | 2.907766  | 4.514238  |
| 59 | 1  | 0 | -3.658416 | -1.220023 | -4.587892 |
| 60 | 1  | 0 | -5.437228 | -2.489043 | -3.445169 |
| 61 | 1  | 0 | -6.003112 | -1.983866 | -1.094886 |
| 62 | 1  | 0 | 4.921847  | -4.200755 | -1.072275 |
| 63 | 1  | 0 | 6.700637  | -4.089923 | -1.023467 |
| 64 | 1  | 0 | 5.795704  | -4.593435 | 0.424513  |
| 65 | 1  | 0 | 7.686450  | -2.017993 | -0.458557 |
| 66 | 1  | 0 | 6.799870  | -0.826429 | 0.493604  |
| 67 | 1  | 0 | 7.333273  | -2.347382 | 1.251007  |
| 68 | 1  | 0 | -1.147821 | 2.291187  | 4.663165  |
| 69 | 1  | 0 | -2.596308 | 4.017325  | 3.561911  |
| 70 | 1  | 0 | -3.475221 | 2.688275  | 4.324654  |
| 71 | 1  | 0 | -3.324875 | 2.740680  | 2.569737  |
| 72 | 1  | 0 | -0.857231 | 0.034597  | 3.689035  |

|     |   |   |           |           |           |
|-----|---|---|-----------|-----------|-----------|
| 73  | 1 | 0 | -2.497770 | 0.314885  | 4.301918  |
| 74  | 1 | 0 | -2.186937 | 0.337149  | 2.559283  |
| 75  | 1 | 0 | -4.156186 | 0.487968  | 1.019342  |
| 76  | 1 | 0 | -6.183747 | 1.575979  | 0.040750  |
| 77  | 1 | 0 | -6.529443 | 0.877993  | 1.630991  |
| 78  | 1 | 0 | -7.064766 | 0.049741  | 0.161180  |
| 79  | 1 | 0 | -4.106270 | -2.009012 | 1.357253  |
| 80  | 1 | 0 | -5.186570 | -1.145450 | 2.479114  |
| 81  | 1 | 0 | -5.857030 | -2.054271 | 1.125807  |
| 82  | 1 | 0 | -2.288768 | 0.366263  | -4.763475 |
| 83  | 1 | 0 | -3.317911 | 2.533159  | -4.051547 |
| 84  | 1 | 0 | -1.653049 | 2.658446  | -4.628388 |
| 85  | 1 | 0 | -1.989493 | 2.767953  | -2.902495 |
| 86  | 1 | 0 | -0.529320 | -0.744632 | -3.415751 |
| 87  | 1 | 0 | 0.023104  | 0.763203  | -4.166228 |
| 88  | 1 | 0 | -0.341367 | 0.714896  | -2.436454 |
| 89  | 1 | 0 | -0.185424 | 3.114534  | -1.271640 |
| 90  | 1 | 0 | -0.238023 | 5.534944  | -0.639876 |
| 91  | 1 | 0 | 0.553646  | 5.277004  | -2.203344 |
| 92  | 1 | 0 | 1.523370  | 5.605210  | -0.760438 |
| 93  | 1 | 0 | 1.963305  | 1.865704  | -1.448804 |
| 94  | 1 | 0 | 1.809164  | 3.125844  | -2.681563 |
| 95  | 1 | 0 | 2.866130  | 3.376835  | -1.292786 |
| 96  | 1 | 0 | 4.316337  | -0.479989 | -2.163021 |
| 97  | 1 | 0 | 5.260368  | 1.270555  | -3.630566 |
| 98  | 1 | 0 | 6.328784  | 3.288174  | -2.645347 |
| 99  | 1 | 0 | 6.439221  | 3.542362  | -0.173598 |
| 100 | 1 | 0 | 5.490514  | 1.792514  | 1.297677  |
| 101 | 1 | 0 | -1.383931 | -2.315022 | 2.513957  |
| 102 | 1 | 0 | -2.582489 | -3.651866 | 2.599601  |
| 103 | 1 | 0 | -0.867459 | -3.977994 | 2.998193  |
| 104 | 1 | 0 | 2.366280  | -4.342286 | 0.402714  |
| 105 | 1 | 0 | 0.988448  | -5.350030 | -0.151141 |
| 106 | 1 | 0 | 1.219430  | -5.063915 | 1.583263  |

Sum of electronic and zero-point Energies= -2590.668915  
Sum of electronic and thermal Energies= -2590.613704  
Sum of electronic and thermal Enthalpies= -2590.612760  
Sum of electronic and thermal Free Energies= -2590.763656

### A-tsa3

| Center<br>Number | Atomic<br>Number | Atomic<br>Type | Coordinates (Angstroms) |           |           |
|------------------|------------------|----------------|-------------------------|-----------|-----------|
|                  |                  |                | X                       | Y         | Z         |
| 1                | 6                | 0              | 0.091593                | 1.120958  | 0.955213  |
| 2                | 6                | 0              | 0.385187                | 2.485393  | 0.601135  |
| 3                | 6                | 0              | 1.165884                | 0.490907  | 1.549453  |
| 4                | 7                | 0              | -0.649937               | 3.349821  | 0.192598  |
| 5                | 6                | 0              | 2.520136                | 1.016141  | 1.621397  |
| 6                | 79               | 0              | -1.602779               | 0.044480  | 0.455363  |
| 7                | 6                | 0              | -3.215599               | -1.110724 | -0.132571 |
| 8                | 7                | 0              | -4.547067               | -0.803382 | -0.091452 |
| 9                | 6                | 0              | -5.311691               | -1.848516 | -0.601999 |
| 10               | 6                | 0              | -4.448087               | -2.835467 | -0.944115 |
| 11               | 7                | 0              | -3.168815               | -2.366301 | -0.668295 |
| 12               | 6                | 0              | -5.103144               | 0.486250  | 0.273952  |
| 13               | 6                | 0              | -1.964424               | -3.168101 | -0.802483 |
| 14               | 6                | 0              | -1.558330               | -3.912776 | 0.325854  |

|    |    |   |           |           |           |
|----|----|---|-----------|-----------|-----------|
| 15 | 6  | 0 | -0.384285 | -4.668571 | 0.224731  |
| 16 | 6  | 0 | 0.359685  | -4.683035 | -0.947664 |
| 17 | 6  | 0 | -0.078654 | -3.960977 | -2.052597 |
| 18 | 6  | 0 | -1.250839 | -3.192252 | -2.023255 |
| 19 | 6  | 0 | -5.186937 | 1.464579  | -0.740627 |
| 20 | 6  | 0 | -5.730740 | 2.712277  | -0.407453 |
| 21 | 6  | 0 | -6.182643 | 2.977206  | 0.878866  |
| 22 | 6  | 0 | -6.104824 | 1.988229  | 1.854811  |
| 23 | 6  | 0 | -5.570080 | 0.719448  | 1.588893  |
| 24 | 7  | 0 | 1.599538  | 3.018538  | 0.578942  |
| 25 | 6  | 0 | 2.665813  | 2.336923  | 1.017134  |
| 26 | 7  | 0 | 3.868397  | 2.948650  | 0.854316  |
| 27 | 6  | 0 | 3.950378  | 4.292309  | 0.284052  |
| 28 | 6  | 0 | 5.149254  | 2.266221  | 0.978845  |
| 29 | 1  | 0 | 2.993651  | 0.195810  | 0.455492  |
| 30 | 6  | 0 | -1.609283 | -2.456186 | -3.320225 |
| 31 | 6  | 0 | -3.010720 | -2.755927 | -3.885931 |
| 32 | 6  | 0 | -1.331815 | -0.942801 | -3.258085 |
| 33 | 6  | 0 | 3.278404  | 0.678600  | 2.890735  |
| 34 | 6  | 0 | 3.476213  | -0.649602 | 3.301287  |
| 35 | 6  | 0 | 4.094927  | -0.940734 | 4.518079  |
| 36 | 6  | 0 | 4.531292  | 0.084350  | 5.357376  |
| 37 | 6  | 0 | 4.329062  | 1.409335  | 4.969449  |
| 38 | 6  | 0 | 3.705404  | 1.701828  | 3.756664  |
| 39 | 6  | 0 | 0.569244  | 4.198342  | -2.116405 |
| 40 | 16 | 0 | -0.298280 | 4.815422  | -0.667564 |
| 41 | 8  | 0 | 0.563257  | 5.738432  | 0.077784  |
| 42 | 8  | 0 | -1.621164 | 5.286913  | -1.096003 |
| 43 | 6  | 0 | -1.914254 | 3.416971  | 0.953135  |
| 44 | 6  | 0 | -5.539096 | -0.262595 | 2.766394  |
| 45 | 6  | 0 | -4.124561 | -0.478115 | 3.336538  |
| 46 | 6  | 0 | -6.265556 | -1.601128 | 2.534461  |
| 47 | 6  | 0 | -4.730764 | 1.224692  | -2.177840 |
| 48 | 6  | 0 | -5.919658 | 1.296018  | -3.157348 |
| 49 | 6  | 0 | -3.610686 | 2.199789  | -2.589242 |
| 50 | 6  | 0 | -2.341893 | -3.942314 | 1.636073  |
| 51 | 6  | 0 | -2.910727 | -5.348932 | 1.911335  |
| 52 | 6  | 0 | -1.492452 | -3.445645 | 2.821552  |
| 53 | 1  | 0 | 1.038400  | -0.510636 | 1.950461  |
| 54 | 1  | 0 | -6.385754 | -1.790032 | -0.665577 |
| 55 | 1  | 0 | -4.617639 | -3.814642 | -1.360573 |
| 56 | 1  | 0 | -0.044747 | -5.240443 | 1.082502  |
| 57 | 1  | 0 | 1.283488  | -5.249600 | -1.004420 |
| 58 | 1  | 0 | 0.511712  | -3.974907 | -2.963445 |
| 59 | 1  | 0 | -5.798163 | 3.482101  | -1.169570 |
| 60 | 1  | 0 | -6.600680 | 3.949738  | 1.121752  |
| 61 | 1  | 0 | -6.467921 | 2.198700  | 2.856825  |
| 62 | 1  | 0 | 4.782653  | 4.821809  | 0.758961  |
| 63 | 1  | 0 | 4.139615  | 4.242451  | -0.796166 |
| 64 | 1  | 0 | 3.020371  | 4.831552  | 0.454029  |
| 65 | 1  | 0 | 5.020358  | 1.195221  | 1.109625  |
| 66 | 1  | 0 | 5.727816  | 2.433048  | 0.063706  |
| 67 | 1  | 0 | 5.721385  | 2.648967  | 1.832331  |
| 68 | 1  | 0 | -0.905305 | -2.859758 | -4.057446 |
| 69 | 1  | 0 | -3.222549 | -3.830876 | -3.888766 |
| 70 | 1  | 0 | -3.065276 | -2.405343 | -4.922209 |
| 71 | 1  | 0 | -3.805918 | -2.251591 | -3.331896 |
| 72 | 1  | 0 | -0.291624 | -0.747677 | -2.985862 |
| 73 | 1  | 0 | -1.515700 | -0.492987 | -4.240950 |

|     |    |   |           |           |           |
|-----|----|---|-----------|-----------|-----------|
| 74  | 1  | 0 | -1.971854 | -0.439231 | -2.529856 |
| 75  | 1  | 0 | 3.141962  | -1.464066 | 2.670325  |
| 76  | 1  | 0 | 4.237217  | -1.978784 | 4.806447  |
| 77  | 1  | 0 | 5.015624  | -0.144896 | 6.302201  |
| 78  | 1  | 0 | 4.645764  | 2.222864  | 5.616643  |
| 79  | 1  | 0 | 3.540651  | 2.739538  | 3.484044  |
| 80  | 1  | 0 | -0.124354 | 3.574893  | -2.680011 |
| 81  | 1  | 0 | 0.840681  | 5.086994  | -2.689675 |
| 82  | 1  | 0 | 1.452371  | 3.638223  | -1.816986 |
| 83  | 1  | 0 | -2.740740 | 3.646156  | 0.283905  |
| 84  | 1  | 0 | -1.854400 | 4.182992  | 1.735944  |
| 85  | 1  | 0 | -2.076321 | 2.445178  | 1.414421  |
| 86  | 1  | 0 | -6.109106 | 0.245628  | 3.553687  |
| 87  | 1  | 0 | -4.178278 | -1.085622 | 4.247041  |
| 88  | 1  | 0 | -3.468683 | -0.986004 | 2.626492  |
| 89  | 1  | 0 | -3.653353 | 0.475402  | 3.593022  |
| 90  | 1  | 0 | -7.258279 | -1.447697 | 2.097779  |
| 91  | 1  | 0 | -6.401013 | -2.111009 | 3.494275  |
| 92  | 1  | 0 | -5.705912 | -2.276291 | 1.883564  |
| 93  | 1  | 0 | -4.318410 | 0.215415  | -2.247311 |
| 94  | 1  | 0 | -6.703895 | 0.579942  | -2.890103 |
| 95  | 1  | 0 | -5.585695 | 1.068979  | -4.175232 |
| 96  | 1  | 0 | -6.370641 | 2.293806  | -3.171020 |
| 97  | 1  | 0 | -2.746216 | 2.108939  | -1.925327 |
| 98  | 1  | 0 | -3.281361 | 1.982519  | -3.610973 |
| 99  | 1  | 0 | -3.943810 | 3.242026  | -2.561105 |
| 100 | 1  | 0 | -3.194032 | -3.263684 | 1.547063  |
| 101 | 1  | 0 | -3.550021 | -5.690300 | 1.090447  |
| 102 | 1  | 0 | -3.508766 | -5.346549 | 2.829087  |
| 103 | 1  | 0 | -2.110972 | -6.086279 | 2.037118  |
| 104 | 1  | 0 | -0.629259 | -4.095003 | 2.999661  |
| 105 | 1  | 0 | -1.119531 | -2.433156 | 2.640065  |
| 106 | 1  | 0 | -2.092220 | -3.431415 | 3.738093  |
| 107 | 7  | 0 | 3.382259  | -0.491682 | -0.578692 |
| 108 | 16 | 0 | 3.134854  | 0.216477  | -2.075291 |
| 109 | 16 | 0 | 3.554930  | -2.148350 | -0.393818 |
| 110 | 8  | 0 | 2.275526  | -0.555959 | -2.962620 |
| 111 | 8  | 0 | 2.855354  | 1.622994  | -1.791467 |
| 112 | 8  | 0 | 3.484422  | -2.878669 | -1.653359 |
| 113 | 8  | 0 | 2.775999  | -2.559933 | 0.771725  |
| 114 | 6  | 0 | 5.346959  | -2.247721 | 0.148767  |
| 115 | 6  | 0 | 4.833202  | 0.229465  | -2.876407 |
| 116 | 9  | 0 | 5.568013  | -1.438741 | 1.189378  |
| 117 | 9  | 0 | 5.604743  | -3.506052 | 0.506228  |
| 118 | 9  | 0 | 6.152697  | -1.897483 | -0.854996 |
| 119 | 9  | 0 | 5.185879  | -0.989829 | -3.270568 |
| 120 | 9  | 0 | 5.741047  | 0.698750  | -2.012944 |
| 121 | 9  | 0 | 4.773961  | 1.040519  | -3.933927 |

Sum of electronic and zero-point Energies= -4417.898350  
Sum of electronic and thermal Energies= -4417.827785  
Sum of electronic and thermal Enthalpies= -4417.826841  
Sum of electronic and thermal Free Energies= -4418.012307

### A-tsb3

| Center<br>Number | Atomic<br>Number | Atomic<br>Type | Coordinates (Angstroms) |   |   |
|------------------|------------------|----------------|-------------------------|---|---|
|                  |                  |                | X                       | Y | Z |

|    |    |   |           |           |           |
|----|----|---|-----------|-----------|-----------|
| 1  | 6  | 0 | -0.817993 | -1.078967 | 1.769146  |
| 2  | 6  | 0 | 0.440221  | -1.588964 | 1.354621  |
| 3  | 6  | 0 | -1.284083 | 0.194780  | 1.413816  |
| 4  | 7  | 0 | 0.776974  | -2.873986 | 1.669045  |
| 5  | 6  | 0 | -2.674993 | 0.273797  | 1.753889  |
| 6  | 79 | 0 | 1.778817  | -0.307455 | 0.391923  |
| 7  | 6  | 0 | 3.099143  | 1.043378  | -0.455952 |
| 8  | 7  | 0 | 4.461824  | 1.075626  | -0.343138 |
| 9  | 6  | 0 | 4.988947  | 2.153393  | -1.046235 |
| 10 | 6  | 0 | 3.943129  | 2.817902  | -1.592805 |
| 11 | 7  | 0 | 2.794072  | 2.122932  | -1.235719 |
| 12 | 6  | 0 | 5.308633  | 0.071592  | 0.279262  |
| 13 | 6  | 0 | 1.460759  | 2.614769  | -1.532728 |
| 14 | 6  | 0 | 0.909682  | 3.549931  | -0.629526 |
| 15 | 6  | 0 | -0.364709 | 4.057702  | -0.911638 |
| 16 | 6  | 0 | -1.065838 | 3.652379  | -2.040603 |
| 17 | 6  | 0 | -0.488546 | 2.743532  | -2.921524 |
| 18 | 6  | 0 | 0.788588  | 2.206357  | -2.708027 |
| 19 | 6  | 0 | 5.695826  | 0.199177  | 1.632601  |
| 20 | 6  | 0 | 6.547712  | -0.792322 | 2.140311  |
| 21 | 6  | 0 | 7.008176  | -1.843679 | 1.355170  |
| 22 | 6  | 0 | 6.628805  | -1.926577 | 0.021911  |
| 23 | 6  | 0 | 5.773025  | -0.975992 | -0.545892 |
| 24 | 7  | 0 | -1.834849 | -1.811818 | 2.399258  |
| 25 | 6  | 0 | -2.900015 | -1.043939 | 2.419780  |
| 26 | 7  | 0 | -4.078951 | -1.478544 | 2.996692  |
| 27 | 6  | 0 | -4.079370 | -2.843204 | 3.512185  |
| 28 | 6  | 0 | -5.359590 | -1.060598 | 2.433430  |
| 29 | 1  | 0 | -3.167797 | -0.020134 | 0.376449  |
| 30 | 6  | 0 | 1.299797  | 1.232673  | -3.777373 |
| 31 | 6  | 0 | 2.690160  | 1.548674  | -4.359339 |
| 32 | 6  | 0 | 1.185098  | -0.244646 | -3.353807 |
| 33 | 6  | 0 | 5.418477  | -1.083978 | -2.027549 |
| 34 | 6  | 0 | 6.588039  | -0.595563 | -2.907842 |
| 35 | 6  | 0 | 4.993764  | -2.507340 | -2.433620 |
| 36 | 6  | 0 | 5.291511  | 1.308281  | 2.611943  |
| 37 | 6  | 0 | 5.613901  | 2.743367  | 2.154410  |
| 38 | 6  | 0 | 3.839945  | 1.185769  | 3.111902  |
| 39 | 6  | 0 | 1.646437  | 4.053517  | 0.610701  |
| 40 | 6  | 0 | 1.993481  | 5.550244  | 0.474948  |
| 41 | 6  | 0 | 0.856063  | 3.785483  | 1.905539  |
| 42 | 6  | 0 | -3.259612 | 1.578244  | 2.225766  |
| 43 | 6  | 0 | -3.865232 | 1.684414  | 3.489925  |
| 44 | 6  | 0 | -4.334476 | 2.911696  | 3.961028  |
| 45 | 6  | 0 | -4.201605 | 4.064139  | 3.186595  |
| 46 | 6  | 0 | -3.590696 | 3.973583  | 1.934421  |
| 47 | 6  | 0 | -3.123951 | 2.747741  | 1.460445  |
| 48 | 6  | 0 | 1.065565  | -3.764422 | -0.925697 |
| 49 | 16 | 0 | 1.929081  | -3.722023 | 0.654468  |
| 50 | 8  | 0 | 2.000179  | -5.085620 | 1.181407  |
| 51 | 8  | 0 | 3.156480  | -2.933993 | 0.513618  |
| 52 | 6  | 0 | 0.127462  | -3.724823 | 2.695590  |
| 53 | 1  | 0 | -0.715500 | 0.966234  | 0.912178  |
| 54 | 1  | 0 | 6.048683  | 2.344523  | -1.078980 |
| 55 | 1  | 0 | 3.902937  | 3.706001  | -2.201565 |
| 56 | 1  | 0 | -0.811114 | 4.776715  | -0.231987 |
| 57 | 1  | 0 | -2.064513 | 4.028467  | -2.232395 |
| 58 | 1  | 0 | -1.043078 | 2.433981  | -3.802351 |
| 59 | 1  | 0 | 6.857899  | -0.727254 | 3.179375  |



|     |    |   |            |            |            |
|-----|----|---|------------|------------|------------|
| 60  | 1  | 0 | 7. 667756  | -2. 593034 | 1. 782874  |
| 61  | 1  | 0 | 6. 996050  | -2. 743698 | -0. 589841 |
| 62  | 1  | 0 | -3. 177946 | -3. 014195 | 4. 100331  |
| 63  | 1  | 0 | -4. 960563 | -2. 976420 | 4. 146732  |
| 64  | 1  | 0 | -4. 105774 | -3. 590815 | 2. 705394  |
| 65  | 1  | 0 | -6. 141277 | -1. 195437 | 3. 187729  |
| 66  | 1  | 0 | -5. 338021 | -0. 009130 | 2. 159277  |
| 67  | 1  | 0 | -5. 629841 | -1. 648950 | 1. 545562  |
| 68  | 1  | 0 | 0. 598533  | 1. 360720  | -4. 610378 |
| 69  | 1  | 0 | 2. 782558  | 2. 606449  | -4. 628530 |
| 70  | 1  | 0 | 2. 841493  | 0. 961495  | -5. 271368 |
| 71  | 1  | 0 | 3. 503165  | 1. 298628  | -3. 674059 |
| 72  | 1  | 0 | 0. 159278  | -0. 492946 | -3. 066228 |
| 73  | 1  | 0 | 1. 466497  | -0. 892668 | -4. 192033 |
| 74  | 1  | 0 | 1. 841915  | -0. 474142 | -2. 509810 |
| 75  | 1  | 0 | 4. 562824  | -0. 432311 | -2. 222590 |
| 76  | 1  | 0 | 6. 863089  | 0. 439909  | -2. 683479 |
| 77  | 1  | 0 | 6. 318787  | -0. 650402 | -3. 968192 |
| 78  | 1  | 0 | 7. 477525  | -1. 216292 | -2. 754339 |
| 79  | 1  | 0 | 4. 218481  | -2. 887447 | -1. 765078 |
| 80  | 1  | 0 | 4. 609850  | -2. 501388 | -3. 459446 |
| 81  | 1  | 0 | 5. 835711  | -3. 207279 | -2. 408168 |
| 82  | 1  | 0 | 5. 926983  | 1. 133195  | 3. 488594  |
| 83  | 1  | 0 | 6. 641386  | 2. 824106  | 1. 783649  |
| 84  | 1  | 0 | 5. 513433  | 3. 426946  | 3. 004268  |
| 85  | 1  | 0 | 4. 939936  | 3. 097489  | 1. 371278  |
| 86  | 1  | 0 | 3. 641215  | 0. 182595  | 3. 500179  |
| 87  | 1  | 0 | 3. 661663  | 1. 905742  | 3. 918754  |
| 88  | 1  | 0 | 3. 113962  | 1. 380229  | 2. 319093  |
| 89  | 1  | 0 | 2. 590829  | 3. 510714  | 0. 698362  |
| 90  | 1  | 0 | 2. 590472  | 5. 744987  | -0. 422165 |
| 91  | 1  | 0 | 2. 566875  | 5. 889276  | 1. 344337  |
| 92  | 1  | 0 | 1. 089769  | 6. 165313  | 0. 411503  |
| 93  | 1  | 0 | 0. 669954  | 2. 716557  | 2. 042552  |
| 94  | 1  | 0 | 1. 422241  | 4. 143695  | 2. 772084  |
| 95  | 1  | 0 | -0. 112865 | 4. 294059  | 1. 908940  |
| 96  | 1  | 0 | -3. 961109 | 0. 799082  | 4. 109813  |
| 97  | 1  | 0 | -4. 798439 | 2. 964116  | 4. 942429  |
| 98  | 1  | 0 | -4. 569494 | 5. 018639  | 3. 552168  |
| 99  | 1  | 0 | -3. 486517 | 4. 860222  | 1. 314305  |
| 100 | 1  | 0 | -2. 667775 | 2. 696164  | 0. 479531  |
| 101 | 1  | 0 | 0. 950673  | -2. 746673 | -1. 296533 |
| 102 | 1  | 0 | 1. 684307  | -4. 363803 | -1. 596339 |
| 103 | 1  | 0 | 0. 090053  | -4. 226328 | -0. 772506 |
| 104 | 1  | 0 | -0. 120959 | -3. 090220 | 3. 541765  |
| 105 | 1  | 0 | 0. 837728  | -4. 494856 | 2. 990194  |
| 106 | 1  | 0 | -0. 792446 | -4. 173293 | 2. 319602  |
| 107 | 7  | 0 | -3. 652021 | -0. 315871 | -0. 814777 |
| 108 | 16 | 0 | -4. 445906 | 0. 842800  | -1. 740288 |
| 109 | 16 | 0 | -3. 063048 | -1. 713168 | -1. 529333 |
| 110 | 8  | 0 | -3. 847461 | 2. 153986  | -1. 502731 |
| 111 | 8  | 0 | -4. 726646 | 0. 381512  | -3. 094235 |
| 112 | 8  | 0 | -2. 242056 | -2. 373687 | -0. 518322 |
| 113 | 8  | 0 | -2. 549983 | -1. 501537 | -2. 878718 |
| 114 | 6  | 0 | -4. 564241 | -2. 828899 | -1. 692524 |
| 115 | 6  | 0 | -6. 108332 | 0. 897454  | -0. 878065 |
| 116 | 9  | 0 | -4. 147369 | -3. 987011 | -2. 210510 |
| 117 | 9  | 0 | -5. 085866 | -3. 056756 | -0. 481472 |
| 118 | 9  | 0 | -5. 496723 | -2. 302153 | -2. 479664 |

|     |   |   |           |           |           |
|-----|---|---|-----------|-----------|-----------|
| 119 | 9 | 0 | -6.621043 | -0.332048 | -0.772885 |
| 120 | 9 | 0 | -6.926147 | 1.655451  | -1.608289 |
| 121 | 9 | 0 | -5.986839 | 1.429858  | 0.340639  |

Sum of electronic and zero-point Energies= -4417.876601  
Sum of electronic and thermal Energies= -4417.805969  
Sum of electronic and thermal Enthalpies= -4417.805025  
Sum of electronic and thermal Free Energies= -4417.990160

### A-a3

| Center Number | Atomic Number | Atomic Type | Coordinates (Angstroms) |           |           |
|---------------|---------------|-------------|-------------------------|-----------|-----------|
|               |               |             | X                       | Y         | Z         |
| 1             | 6             | 0           | 1.708909                | -0.316845 | 0.251631  |
| 2             | 6             | 0           | 2.265520                | -1.587899 | 0.049217  |
| 3             | 6             | 0           | 2.673863                | 0.687498  | 0.461612  |
| 4             | 7             | 0           | 1.375982                | -2.711176 | -0.156014 |
| 5             | 6             | 0           | 4.053309                | 0.449996  | 0.451306  |
| 6             | 79            | 0           | -0.302864               | 0.106726  | 0.148090  |
| 7             | 6             | 0           | -2.312266               | 0.599395  | 0.023073  |
| 8             | 7             | 0           | -3.399975               | -0.185410 | 0.289323  |
| 9             | 6             | 0           | -4.583241               | 0.520202  | 0.092831  |
| 10            | 6             | 0           | -4.235868               | 1.759561  | -0.329453 |
| 11            | 7             | 0           | -2.844986               | 1.802441  | -0.351300 |
| 12            | 6             | 0           | -3.353829               | -1.523463 | 0.849783  |
| 13            | 6             | 0           | -2.094056               | 2.935630  | -0.859618 |
| 14            | 6             | 0           | -1.773649               | 2.935038  | -2.234393 |
| 15            | 6             | 0           | -1.067371               | 4.031914  | -2.744662 |
| 16            | 6             | 0           | -0.700730               | 5.092826  | -1.927332 |
| 17            | 6             | 0           | -1.041710               | 5.073886  | -0.578464 |
| 18            | 6             | 0           | -1.743374               | 4.005251  | -0.002799 |
| 19            | 6             | 0           | -3.228500               | -1.630839 | 2.252144  |
| 20            | 6             | 0           | -3.191579               | -2.913826 | 2.812445  |
| 21            | 6             | 0           | -3.281895               | -4.046814 | 2.013576  |
| 22            | 6             | 0           | -3.423162               | -3.911124 | 0.636158  |
| 23            | 6             | 0           | -3.469026               | -2.656356 | 0.010811  |
| 24            | 7             | 0           | 3.573010                | -1.877313 | 0.084730  |
| 25            | 6             | 0           | 4.463575                | -0.897214 | 0.274559  |
| 26            | 7             | 0           | 5.831738                | -1.254928 | 0.271693  |
| 27            | 6             | 0           | 6.157000                | -2.553984 | -0.298942 |
| 28            | 6             | 0           | 6.579111                | -0.993034 | 1.502114  |
| 29            | 6             | 0           | -2.016556               | 4.110688  | 1.502668  |
| 30            | 6             | 0           | -3.490360               | 3.986574  | 1.932337  |
| 31            | 6             | 0           | -1.104151               | 3.191270  | 2.336838  |
| 32            | 6             | 0           | 4.987300                | 1.604810  | 0.555912  |
| 33            | 6             | 0           | 4.804293                | 2.577365  | 1.553620  |
| 34            | 6             | 0           | 5.630727                | 3.700299  | 1.624217  |
| 35            | 6             | 0           | 6.657327                | 3.874356  | 0.695900  |
| 36            | 6             | 0           | 6.851062                | 2.914660  | -0.301624 |
| 37            | 6             | 0           | 6.028539                | 1.792042  | -0.371045 |
| 38            | 6             | 0           | 2.947126                | -4.782904 | -1.215263 |
| 39            | 16            | 0           | 1.570170                | -3.656128 | -1.529823 |
| 40            | 8             | 0           | 1.958256                | -2.762563 | -2.622059 |
| 41            | 8             | 0           | 0.364180                | -4.493165 | -1.633798 |
| 42            | 6             | 0           | 0.851003                | -3.362988 | 1.049554  |
| 43            | 6             | 0           | -3.627123               | -2.662956 | -1.514562 |
| 44            | 6             | 0           | -2.350024               | -2.237632 | -2.261433 |
| 45            | 6             | 0           | -4.874437               | -1.931085 | -2.047806 |

|     |   |   |           |           |           |
|-----|---|---|-----------|-----------|-----------|
| 46  | 6 | 0 | -3.155196 | -0.421591 | 3.181515  |
| 47  | 6 | 0 | -4.383604 | -0.359426 | 4.111499  |
| 48  | 6 | 0 | -1.843496 | -0.401305 | 3.989351  |
| 49  | 6 | 0 | -2.165450 | 1.808306  | -3.186608 |
| 50  | 6 | 0 | -3.140432 | 2.308294  | -4.271564 |
| 51  | 6 | 0 | -0.926253 | 1.140396  | -3.813729 |
| 52  | 1 | 0 | 2.346629  | 1.717587  | 0.576507  |
| 53  | 1 | 0 | -5.548333 | 0.072993  | 0.264372  |
| 54  | 1 | 0 | -4.836507 | 2.609871  | -0.607272 |
| 55  | 1 | 0 | -0.804278 | 4.048642  | -3.797563 |
| 56  | 1 | 0 | -0.153366 | 5.936268  | -2.338107 |
| 57  | 1 | 0 | -0.754949 | 5.908201  | 0.055535  |
| 58  | 1 | 0 | -3.093830 | -3.020725 | 3.888435  |
| 59  | 1 | 0 | -3.249940 | -5.035918 | 2.461557  |
| 60  | 1 | 0 | -3.495661 | -4.800327 | 0.017061  |
| 61  | 1 | 0 | 7.241466  | -2.603742 | -0.445021 |
| 62  | 1 | 0 | 5.856108  | -3.399704 | 0.340651  |
| 63  | 1 | 0 | 5.668552  | -2.667234 | -1.268375 |
| 64  | 1 | 0 | 6.337184  | -0.008533 | 1.900367  |
| 65  | 1 | 0 | 6.368390  | -1.747286 | 2.279923  |
| 66  | 1 | 0 | 7.652860  | -1.015477 | 1.287731  |
| 67  | 1 | 0 | -1.726310 | 5.137678  | 1.756176  |
| 68  | 1 | 0 | -4.142936 | 4.610207  | 1.311813  |
| 69  | 1 | 0 | -3.594891 | 4.327083  | 2.968188  |
| 70  | 1 | 0 | -3.857713 | 2.959186  | 1.888986  |
| 71  | 1 | 0 | -0.050072 | 3.375411  | 2.108986  |
| 72  | 1 | 0 | -1.259421 | 3.379367  | 3.405482  |
| 73  | 1 | 0 | -1.298404 | 2.134161  | 2.142350  |
| 74  | 1 | 0 | 4.012893  | 2.441666  | 2.285688  |
| 75  | 1 | 0 | 5.473217  | 4.436091  | 2.408320  |
| 76  | 1 | 0 | 7.302296  | 4.746990  | 0.749003  |
| 77  | 1 | 0 | 7.644643  | 3.044000  | -1.032735 |
| 78  | 1 | 0 | 6.186870  | 1.046632  | -1.142630 |
| 79  | 1 | 0 | 2.676641  | -5.442577 | -0.389142 |
| 80  | 1 | 0 | 3.101755  | -5.363725 | -2.126341 |
| 81  | 1 | 0 | 3.816423  | -4.178189 | -0.963563 |
| 82  | 1 | 0 | 0.375631  | -2.596180 | 1.665174  |
| 83  | 1 | 0 | 1.641274  | -3.852531 | 1.637450  |
| 84  | 1 | 0 | 0.094308  | -4.092636 | 0.760349  |
| 85  | 1 | 0 | -3.782481 | -3.719938 | -1.761762 |
| 86  | 1 | 0 | -2.503815 | -2.343197 | -3.341534 |
| 87  | 1 | 0 | -2.082878 | -1.198140 | -2.058569 |
| 88  | 1 | 0 | -1.500884 | -2.864800 | -1.980525 |
| 89  | 1 | 0 | -5.774127 | -2.198659 | -1.482201 |
| 90  | 1 | 0 | -5.041566 | -2.218382 | -3.091370 |
| 91  | 1 | 0 | -4.765137 | -0.844396 | -2.025510 |
| 92  | 1 | 0 | -3.167482 | 0.484775  | 2.571885  |
| 93  | 1 | 0 | -5.317595 | -0.335135 | 3.540503  |
| 94  | 1 | 0 | -4.343803 | 0.539965  | 4.735375  |
| 95  | 1 | 0 | -4.425888 | -1.225802 | 4.780088  |
| 96  | 1 | 0 | -0.974576 | -0.396972 | 3.324342  |
| 97  | 1 | 0 | -1.799068 | 0.496058  | 4.615911  |
| 98  | 1 | 0 | -1.763373 | -1.270602 | 4.650789  |
| 99  | 1 | 0 | -2.689467 | 1.038488  | -2.615796 |
| 100 | 1 | 0 | -4.040406 | 2.750707  | -3.831263 |
| 101 | 1 | 0 | -3.450169 | 1.476926  | -4.913475 |
| 102 | 1 | 0 | -2.676589 | 3.066106  | -4.911935 |
| 103 | 1 | 0 | -0.361018 | 1.843912  | -4.434435 |
| 104 | 1 | 0 | -0.253885 | 0.750495  | -3.044083 |

105            1            0            -1.230639    0.304676    -4.452131

Sum of electronic and zero-point Energies= -2590.290693  
Sum of electronic and thermal Energies= -2590.236361  
Sum of electronic and thermal Enthalpies= -2590.235417  
Sum of electronic and thermal Free Energies= -2590.384643

A-b3

| Center<br>Number | Atomic<br>Number | Atomic<br>Type | Coordinates (Angstroms) |           |           |
|------------------|------------------|----------------|-------------------------|-----------|-----------|
|                  |                  |                | X                       | Y         | Z         |
| 1                | 6                | 0              | 2.205179                | 1.799545  | 0.014321  |
| 2                | 6                | 0              | 0.843351                | 2.053410  | -0.074934 |
| 3                | 6                | 0              | 2.794395                | 0.476779  | -0.003779 |
| 4                | 7                | 0              | 0.369003                | 3.372727  | 0.023602  |
| 5                | 6                | 0              | 4.156489                | 0.621350  | 0.095207  |
| 6                | 79               | 0              | -0.497158               | 0.459059  | -0.078892 |
| 7                | 6                | 0              | -1.758158               | -1.173326 | 0.080421  |
| 8                | 7                | 0              | -3.001588               | -1.226460 | 0.648994  |
| 9                | 6                | 0              | -3.514943               | -2.518421 | 0.602189  |
| 10               | 6                | 0              | -2.574554               | -3.295916 | 0.015463  |
| 11               | 7                | 0              | -1.510931               | -2.460914 | -0.312095 |
| 12               | 6                | 0              | -3.787829               | -0.095522 | 1.111270  |
| 13               | 6                | 0              | -0.261617               | -2.964955 | -0.848765 |
| 14               | 6                | 0              | 0.703370                | -3.414252 | 0.079543  |
| 15               | 6                | 0              | 1.900201                | -3.941416 | -0.422069 |
| 16               | 6                | 0              | 2.127444                | -4.026768 | -1.790152 |
| 17               | 6                | 0              | 1.153792                | -3.588300 | -2.681979 |
| 18               | 6                | 0              | -0.065761               | -3.050398 | -2.246380 |
| 19               | 6                | 0              | -3.745332               | 0.301003  | 2.467240  |
| 20               | 6                | 0              | -4.562671               | 1.379801  | 2.834078  |
| 21               | 6                | 0              | -5.388468               | 2.025457  | 1.920201  |
| 22               | 6                | 0              | -5.424699               | 1.596088  | 0.600157  |
| 23               | 6                | 0              | -4.628804               | 0.530282  | 0.165556  |
| 24               | 7                | 0              | 3.232791                | 2.753664  | 0.090602  |
| 25               | 6                | 0              | 4.361865                | 2.078258  | 0.131783  |
| 26               | 7                | 0              | 5.597854                | 2.724076  | 0.231332  |
| 27               | 6                | 0              | 5.532175                | 4.162554  | 0.460241  |
| 28               | 6                | 0              | 6.619042                | 2.362935  | -0.752136 |
| 29               | 6                | 0              | -1.042290               | -2.608540 | -3.343248 |
| 30               | 6                | 0              | -2.445553               | -3.240659 | -3.279328 |
| 31               | 6                | 0              | -1.117619               | -1.078064 | -3.504964 |
| 32               | 6                | 0              | -4.736282               | 0.065677  | -1.285191 |
| 33               | 6                | 0              | -6.032968               | -0.741181 | -1.505637 |
| 34               | 6                | 0              | -4.640505               | 1.230448  | -2.288051 |
| 35               | 6                | 0              | -2.901171               | -0.317668 | 3.588763  |
| 36               | 6                | 0              | -3.085863               | -1.832078 | 3.801214  |
| 37               | 6                | 0              | -1.411126               | 0.065285  | 3.513844  |
| 38               | 6                | 0              | 0.481261                | -3.391942 | 1.590683  |
| 39               | 6                | 0              | 0.298444                | -4.823974 | 2.134835  |
| 40               | 6                | 0              | 1.608819                | -2.658174 | 2.340651  |
| 41               | 6                | 0              | 5.138609                | -0.464899 | 0.248824  |
| 42               | 6                | 0              | 6.225072                | -0.351763 | 1.138628  |
| 43               | 6                | 0              | 7.117124                | -1.407778 | 1.320019  |
| 44               | 6                | 0              | 6.949175                | -2.604885 | 0.620276  |
| 45               | 6                | 0              | 5.878500                | -2.731506 | -0.267844 |
| 46               | 6                | 0              | 4.987520                | -1.675281 | -0.454287 |
| 47               | 6                | 0              | -0.506629               | 3.606268  | -2.578937 |

|     |    |   |            |            |            |
|-----|----|---|------------|------------|------------|
| 48  | 16 | 0 | -1. 022931 | 3. 813530  | -0. 861386 |
| 49  | 8  | 0 | -1. 245272 | 5. 242777  | -0. 622816 |
| 50  | 8  | 0 | -2. 117674 | 2. 866110  | -0. 615412 |
| 51  | 6  | 0 | 1. 117303  | 4. 496208  | 0. 629252  |
| 52  | 1  | 0 | 2. 240992  | -0. 451589 | -0. 046289 |
| 53  | 1  | 0 | -4. 488513 | -2. 756599 | 0. 997431  |
| 54  | 1  | 0 | -2. 559817 | -4. 350131 | -0. 206838 |
| 55  | 1  | 0 | 2. 661472  | -4. 285489 | 0. 270200  |
| 56  | 1  | 0 | 3. 059248  | -4. 441243 | -2. 164103 |
| 57  | 1  | 0 | 1. 335680  | -3. 664875 | -3. 750269 |
| 58  | 1  | 0 | -4. 546919 | 1. 714377  | 3. 867516  |
| 59  | 1  | 0 | -6. 006616 | 2. 858993  | 2. 240630  |
| 60  | 1  | 0 | -6. 074727 | 2. 097386  | -0. 109136 |
| 61  | 1  | 0 | 4. 838714  | 4. 373484  | 1. 274838  |
| 62  | 1  | 0 | 6. 531445  | 4. 519281  | 0. 731261  |
| 63  | 1  | 0 | 5. 187950  | 4. 718018  | -0. 426250 |
| 64  | 1  | 0 | 7. 600724  | 2. 692567  | -0. 395678 |
| 65  | 1  | 0 | 6. 653861  | 1. 284027  | -0. 894640 |
| 66  | 1  | 0 | 6. 431641  | 2. 838308  | -1. 729860 |
| 67  | 1  | 0 | -0. 593570 | -2. 988676 | -4. 269236 |
| 68  | 1  | 0 | -2. 390110 | -4. 325228 | -3. 136513 |
| 69  | 1  | 0 | -2. 968558 | -3. 057441 | -4. 224092 |
| 70  | 1  | 0 | -3. 060919 | -2. 822024 | -2. 480300 |
| 71  | 1  | 0 | -0. 120106 | -0. 650489 | -3. 644373 |
| 72  | 1  | 0 | -1. 723563 | -0. 826739 | -4. 383115 |
| 73  | 1  | 0 | -1. 562171 | -0. 593986 | -2. 632282 |
| 74  | 1  | 0 | -3. 894970 | -0. 600010 | -1. 493947 |
| 75  | 1  | 0 | -6. 087386 | -1. 613411 | -0. 845987 |
| 76  | 1  | 0 | -6. 092722 | -1. 096292 | -2. 540306 |
| 77  | 1  | 0 | -6. 916257 | -0. 122869 | -1. 311719 |
| 78  | 1  | 0 | -3. 756308 | 1. 841125  | -2. 092827 |
| 79  | 1  | 0 | -4. 586084 | 0. 836271  | -3. 308945 |
| 80  | 1  | 0 | -5. 520334 | 1. 881192  | -2. 240296 |
| 81  | 1  | 0 | -3. 287537 | 0. 152306  | 4. 501509  |
| 82  | 1  | 0 | -4. 145895 | -2. 106501 | 3. 833249  |
| 83  | 1  | 0 | -2. 639746 | -2. 120977 | 4. 759001  |
| 84  | 1  | 0 | -2. 602404 | -2. 428924 | 3. 024698  |
| 85  | 1  | 0 | -1. 286886 | 1. 149345  | 3. 438884  |
| 86  | 1  | 0 | -0. 893056 | -0. 276618 | 4. 417323  |
| 87  | 1  | 0 | -0. 913959 | -0. 378721 | 2. 648222  |
| 88  | 1  | 0 | -0. 442591 | -2. 845870 | 1. 795044  |
| 89  | 1  | 0 | -0. 532862 | -5. 339870 | 1. 642899  |
| 90  | 1  | 0 | 0. 093032  | -4. 799802 | 3. 210330  |
| 91  | 1  | 0 | 1. 200773  | -5. 425368 | 1. 980449  |
| 92  | 1  | 0 | 1. 719351  | -1. 629207 | 1. 988759  |
| 93  | 1  | 0 | 1. 384053  | -2. 628657 | 3. 412150  |
| 94  | 1  | 0 | 2. 574835  | -3. 159038 | 2. 221404  |
| 95  | 1  | 0 | 6. 356910  | 0. 574758  | 1. 688646  |
| 96  | 1  | 0 | 7. 944682  | -1. 296689 | 2. 015858  |
| 97  | 1  | 0 | 7. 646646  | -3. 425887 | 0. 760878  |
| 98  | 1  | 0 | 5. 744946  | -3. 653521 | -0. 828656 |
| 99  | 1  | 0 | 4. 167427  | -1. 775798 | -1. 158707 |
| 100 | 1  | 0 | -0. 225898 | 2. 564475  | -2. 734456 |
| 101 | 1  | 0 | -1. 359444 | 3. 879836  | -3. 202868 |
| 102 | 1  | 0 | 0. 337265  | 4. 271115  | -2. 767423 |
| 103 | 1  | 0 | 1. 652546  | 4. 097625  | 1. 488907  |
| 104 | 1  | 0 | 0. 401775  | 5. 253259  | 0. 945442  |
| 105 | 1  | 0 | 1. 852297  | 4. 923840  | -0. 054837 |

Sum of electronic and zero-point Energies= -2590.263263  
 Sum of electronic and thermal Energies= -2590.208563  
 Sum of electronic and thermal Enthalpies= -2590.207619  
 Sum of electronic and thermal Free Energies= -2590.358657

A-tsa4

| Center<br>Number | Atomic<br>Number | Atomic<br>Type | Coordinates (Angstroms) |           |           |
|------------------|------------------|----------------|-------------------------|-----------|-----------|
|                  |                  |                | X                       | Y         | Z         |
| 1                | 6                | 0              | -1.054824               | -0.418390 | -0.518849 |
| 2                | 6                | 0              | -1.560009               | -1.635450 | -1.099259 |
| 3                | 6                | 0              | -1.738004               | 0.734063  | -1.016325 |
| 4                | 7                | 0              | -1.098704               | -2.902980 | -0.717233 |
| 5                | 6                | 0              | -2.782996               | 0.727949  | -1.928682 |
| 6                | 79               | 0              | 1.022841                | -0.026446 | -0.254978 |
| 7                | 6                | 0              | 3.039665                | 0.375264  | -0.153311 |
| 8                | 7                | 0              | 4.020171                | -0.456721 | 0.310543  |
| 9                | 6                | 0              | 5.274839                | 0.126252  | 0.167047  |
| 10               | 6                | 0              | 5.078251                | 1.350977  | -0.375904 |
| 11               | 7                | 0              | 3.708613                | 1.489947  | -0.578737 |
| 12               | 6                | 0              | 3.835808                | -1.829530 | 0.743826  |
| 13               | 6                | 0              | 3.098732                | 2.724988  | -1.039615 |
| 14               | 6                | 0              | 2.827670                | 3.711485  | -0.063883 |
| 15               | 6                | 0              | 2.236010                | 4.906422  | -0.490786 |
| 16               | 6                | 0              | 1.934219                | 5.119835  | -1.830128 |
| 17               | 6                | 0              | 2.245155                | 4.145635  | -2.772693 |
| 18               | 6                | 0              | 2.842424                | 2.927713  | -2.415118 |
| 19               | 6                | 0              | 3.938320                | -2.832914 | -0.245499 |
| 20               | 6                | 0              | 3.785301                | -4.166287 | 0.153330  |
| 21               | 6                | 0              | 3.537621                | -4.492264 | 1.481246  |
| 22               | 6                | 0              | 3.457229                | -3.484076 | 2.436424  |
| 23               | 6                | 0              | 3.610589                | -2.128927 | 2.107043  |
| 24               | 7                | 0              | -2.487465               | -1.664536 | -2.060527 |
| 25               | 6                | 0              | -3.100347               | -0.551161 | -2.485528 |
| 26               | 7                | 0              | -4.055832               | -0.734290 | -3.463000 |
| 27               | 6                | 0              | -4.570770               | -2.070741 | -3.732942 |
| 28               | 6                | 0              | -4.281401               | 0.220368  | -4.540904 |
| 29               | 6                | 0              | 3.159798                | 1.969687  | -3.571208 |
| 30               | 6                | 0              | 4.618748                | 1.481721  | -3.645094 |
| 31               | 6                | 0              | 2.166659                | 0.798688  | -3.692801 |
| 32               | 6                | 0              | -3.555475               | 1.981143  | -2.152085 |
| 33               | 6                | 0              | -2.898092               | 3.185784  | -2.453271 |
| 34               | 6                | 0              | -3.611564               | 4.377610  | -2.589433 |
| 35               | 6                | 0              | -4.997726               | 4.389858  | -2.429656 |
| 36               | 6                | 0              | -5.664153               | 3.199774  | -2.126829 |
| 37               | 6                | 0              | -4.952130               | 2.009644  | -1.987702 |
| 38               | 6                | 0              | -1.552898               | -4.421618 | -3.009096 |
| 39               | 16               | 0              | -1.923255               | -4.335802 | -1.248102 |
| 40               | 8                | 0              | -3.367923               | -4.211394 | -1.058273 |
| 41               | 8                | 0              | -1.208449               | -5.449187 | -0.615517 |
| 42               | 6                | 0              | 0.004493                | -3.085220 | 0.235029  |
| 43               | 6                | 0              | 3.503559                | -1.133096 | 3.268654  |
| 44               | 6                | 0              | 2.144493                | -0.408764 | 3.319498  |
| 45               | 6                | 0              | 4.677927                | -0.146952 | 3.410089  |
| 46               | 6                | 0              | 4.228430                | -2.531042 | -1.714669 |
| 47               | 6                | 0              | 5.621105                | -3.052697 | -2.122493 |
| 48               | 6                | 0              | 3.136007                | -3.088967 | -2.647118 |
| 49               | 6                | 0              | 3.215158                | 3.552505  | 1.405553  |

|     |    |   |            |            |            |
|-----|----|---|------------|------------|------------|
| 50  | 6  | 0 | 4. 553492  | 4. 270206  | 1. 686831  |
| 51  | 6  | 0 | 2. 130392  | 4. 046898  | 2. 378691  |
| 52  | 1  | 0 | -1. 476964 | 1. 687667  | -0. 568441 |
| 53  | 1  | 0 | 6. 175216  | -0. 380588 | 0. 472798  |
| 54  | 1  | 0 | 5. 773946  | 2. 128213  | -0. 644733 |
| 55  | 1  | 0 | 2. 010238  | 5. 676437  | 0. 238654  |
| 56  | 1  | 0 | 1. 471982  | 6. 051545  | -2. 143352 |
| 57  | 1  | 0 | 2. 029856  | 4. 329677  | -3. 821598 |
| 58  | 1  | 0 | 3. 858630  | -4. 955750 | -0. 588084 |
| 59  | 1  | 0 | 3. 413478  | -5. 530285 | 1. 775125  |
| 60  | 1  | 0 | 3. 271152  | -3. 746795 | 3. 473689  |
| 61  | 1  | 0 | -5. 614793 | -1. 982550 | -4. 054541 |
| 62  | 1  | 0 | -4. 013377 | -2. 572648 | -4. 539019 |
| 63  | 1  | 0 | -4. 514702 | -2. 686512 | -2. 836546 |
| 64  | 1  | 0 | -3. 632003 | 1. 086776  | -4. 440626 |
| 65  | 1  | 0 | -4. 064156 | -0. 262920 | -5. 503816 |
| 66  | 1  | 0 | -5. 320140 | 0. 571735  | -4. 560447 |
| 67  | 1  | 0 | 3. 013411  | 2. 582178  | -4. 469377 |
| 68  | 1  | 0 | 5. 324879  | 2. 311882  | -3. 536788 |
| 69  | 1  | 0 | 4. 797690  | 1. 020137  | -4. 622145 |
| 70  | 1  | 0 | 4. 852508  | 0. 733804  | -2. 884369 |
| 71  | 1  | 0 | 1. 134435  | 1. 159331  | -3. 727524 |
| 72  | 1  | 0 | 2. 363701  | 0. 239055  | -4. 614560 |
| 73  | 1  | 0 | 2. 241408  | 0. 107223  | -2. 850401 |
| 74  | 1  | 0 | -1. 819502 | 3. 182872  | -2. 585391 |
| 75  | 1  | 0 | -3. 082160 | 5. 297084  | -2. 823990 |
| 76  | 1  | 0 | -5. 553781 | 5. 316730  | -2. 536823 |
| 77  | 1  | 0 | -6. 741842 | 3. 200087  | -1. 987916 |
| 78  | 1  | 0 | -5. 475395 | 1. 090814  | -1. 740177 |
| 79  | 1  | 0 | -0. 473193 | -4. 526371 | -3. 120130 |
| 80  | 1  | 0 | -2. 062988 | -5. 311606 | -3. 383158 |
| 81  | 1  | 0 | -1. 925143 | -3. 516487 | -3. 482373 |
| 82  | 1  | 0 | 0. 930876  | -2. 681433 | -0. 182160 |
| 83  | 1  | 0 | 0. 124672  | -4. 150137 | 0. 417253  |
| 84  | 1  | 0 | -0. 219571 | -2. 595376 | 1. 180793  |
| 85  | 1  | 0 | 3. 543513  | -1. 764720 | 4. 164387  |
| 86  | 1  | 0 | 2. 065298  | 0. 178776  | 4. 240046  |
| 87  | 1  | 0 | 2. 011805  | 0. 271512  | 2. 474497  |
| 88  | 1  | 0 | 1. 315484  | -1. 121898 | 3. 305838  |
| 89  | 1  | 0 | 5. 644608  | -0. 658561 | 3. 345863  |
| 90  | 1  | 0 | 4. 623955  | 0. 337902  | 4. 390359  |
| 91  | 1  | 0 | 4. 658448  | 0. 643473  | 2. 656644  |
| 92  | 1  | 0 | 4. 235890  | -1. 447046 | -1. 850865 |
| 93  | 1  | 0 | 6. 409309  | -2. 624782 | -1. 494573 |
| 94  | 1  | 0 | 5. 837879  | -2. 791104 | -3. 163740 |
| 95  | 1  | 0 | 5. 680946  | -4. 142471 | -2. 032551 |
| 96  | 1  | 0 | 2. 152016  | -2. 688717 | -2. 385450 |
| 97  | 1  | 0 | 3. 350775  | -2. 813065 | -3. 685077 |
| 98  | 1  | 0 | 3. 081563  | -4. 181587 | -2. 600179 |
| 99  | 1  | 0 | 3. 359025  | 2. 487577  | 1. 607201  |
| 100 | 1  | 0 | 5. 364437  | 3. 897320  | 1. 053351  |
| 101 | 1  | 0 | 4. 849290  | 4. 127866  | 2. 731639  |
| 102 | 1  | 0 | 4. 460825  | 5. 347018  | 1. 507622  |
| 103 | 1  | 0 | 2. 011923  | 5. 135264  | 2. 339068  |
| 104 | 1  | 0 | 1. 164347  | 3. 583600  | 2. 170834  |
| 105 | 1  | 0 | 2. 416795  | 3. 793905  | 3. 404718  |
| 106 | 1  | 0 | -1. 309200 | -0. 258578 | 0. 968958  |
| 107 | 7  | 0 | -1. 708888 | 0. 017318  | 2. 137185  |
| 108 | 16 | 0 | -2. 347195 | -1. 177571 | 3. 127065  |

|     |    |   |           |           |          |
|-----|----|---|-----------|-----------|----------|
| 109 | 16 | 0 | -1.418032 | 1.570138  | 2.664443 |
| 110 | 8  | 0 | -1.545124 | -2.387181 | 2.961903 |
| 111 | 8  | 0 | -2.702570 | -0.670762 | 4.445719 |
| 112 | 8  | 0 | -0.938433 | 1.640308  | 4.037555 |
| 113 | 8  | 0 | -0.676092 | 2.215008  | 1.577958 |
| 114 | 6  | 0 | -3.963950 | -1.521235 | 2.245500 |
| 115 | 6  | 0 | -3.101045 | 2.402275  | 2.632262 |
| 116 | 9  | 0 | -2.913412 | 3.708693  | 2.834902 |
| 117 | 9  | 0 | -3.668041 | 2.217133  | 1.437928 |
| 118 | 9  | 0 | -3.894382 | 1.915470  | 3.582141 |
| 119 | 9  | 0 | -3.732749 | -1.927790 | 0.998108 |
| 120 | 9  | 0 | -4.710035 | -0.413300 | 2.217579 |
| 121 | 9  | 0 | -4.609472 | -2.474037 | 2.915692 |

Sum of electronic and zero-point Energies= -4417.908444  
Sum of electronic and thermal Energies= -4417.837750  
Sum of electronic and thermal Enthalpies= -4417.836806  
Sum of electronic and thermal Free Energies= -4418.024439

#### A-tsb4

| Center<br>Number | Atomic<br>Number | Atomic<br>Type | Coordinates (Angstroms) |           |           |
|------------------|------------------|----------------|-------------------------|-----------|-----------|
|                  |                  |                | X                       | Y         | Z         |
| 1                | 6                | 0              | 2.044328                | -0.074383 | 1.081133  |
| 2                | 6                | 0              | 0.860048                | -0.800548 | 1.112891  |
| 3                | 6                | 0              | 2.422161                | 0.788466  | -0.044226 |
| 4                | 7                | 0              | 0.525304                | -1.573249 | 2.270998  |
| 5                | 6                | 0              | 3.616912                | 1.358619  | 0.252571  |
| 6                | 79               | 0              | -0.785718               | 0.305844  | 0.272083  |
| 7                | 6                | 0              | -2.332479               | 1.515121  | -0.331665 |
| 8                | 7                | 0              | -3.676913               | 1.314002  | -0.206129 |
| 9                | 6                | 0              | -4.384397               | 2.371435  | -0.765823 |
| 10               | 6                | 0              | -3.469288               | 3.245417  | -1.253346 |
| 11               | 7                | 0              | -2.215236               | 2.721545  | -0.960882 |
| 12               | 6                | 0              | -4.292533               | 0.191866  | 0.480087  |
| 13               | 6                | 0              | -0.967472               | 3.352724  | -1.357020 |
| 14               | 6                | 0              | -0.444306               | 3.023105  | -2.627103 |
| 15               | 6                | 0              | 0.755382                | 3.628450  | -3.021058 |
| 16               | 6                | 0              | 1.410894                | 4.530438  | -2.192822 |
| 17               | 6                | 0              | 0.862118                | 4.850910  | -0.956092 |
| 18               | 6                | 0              | -0.334605               | 4.280999  | -0.497266 |
| 19               | 6                | 0              | -4.822378               | -0.885635 | -0.260520 |
| 20               | 6                | 0              | -5.366807               | -1.950795 | 0.474996  |
| 21               | 6                | 0              | -5.402960               | -1.944981 | 1.862914  |
| 22               | 6                | 0              | -4.907208               | -0.850045 | 2.563625  |
| 23               | 6                | 0              | -4.348158               | 0.243340  | 1.894352  |
| 24               | 7                | 0              | 3.045366                | -0.049482 | 2.038411  |
| 25               | 6                | 0              | 3.977353                | 0.771080  | 1.575967  |
| 26               | 7                | 0              | 5.109917                | 1.031202  | 2.292260  |
| 27               | 6                | 0              | 5.193476                | 0.502072  | 3.648094  |
| 28               | 6                | 0              | 6.404755                | 1.255556  | 1.655087  |
| 29               | 6                | 0              | -0.774957               | 4.706068  | 0.909757  |
| 30               | 6                | 0              | -2.248672               | 5.112702  | 1.084498  |
| 31               | 6                | 0              | -0.337397               | 3.689781  | 1.983443  |
| 32               | 6                | 0              | -3.901318               | 1.468485  | 2.690796  |
| 33               | 6                | 0              | -5.075854               | 2.461264  | 2.839173  |
| 34               | 6                | 0              | -3.316288               | 1.131468  | 4.073002  |
| 35               | 6                | 0              | -4.962581               | -1.004968 | -1.783913 |



|    |    |   |           |           |           |
|----|----|---|-----------|-----------|-----------|
| 36 | 6  | 0 | -6.331322 | -0.451481 | -2.239692 |
| 37 | 6  | 0 | -3.834619 | -0.457636 | -2.669491 |
| 38 | 6  | 0 | -1.124008 | 2.050110  | -3.585057 |
| 39 | 6  | 0 | -1.614034 | 2.770667  | -4.857052 |
| 40 | 6  | 0 | -0.211017 | 0.860465  | -3.937442 |
| 41 | 6  | 0 | 4.317134  | 2.361148  | -0.573761 |
| 42 | 6  | 0 | 4.519634  | 2.121058  | -1.944319 |
| 43 | 6  | 0 | 5.123442  | 3.084162  | -2.753329 |
| 44 | 6  | 0 | 5.537986  | 4.302257  | -2.209484 |
| 45 | 6  | 0 | 5.345153  | 4.550902  | -0.847550 |
| 46 | 6  | 0 | 4.741122  | 3.590635  | -0.036952 |
| 47 | 6  | 0 | 1.922700  | -1.510325 | 4.647391  |
| 48 | 16 | 0 | 0.457340  | -0.861972 | 3.828532  |
| 49 | 8  | 0 | -0.712211 | -1.427467 | 4.522449  |
| 50 | 8  | 0 | 0.585455  | 0.591267  | 3.700243  |
| 51 | 6  | 0 | -0.316641 | -2.763216 | 2.062639  |
| 52 | 1  | 0 | 1.827539  | 0.958096  | -0.930632 |
| 53 | 1  | 0 | -5.461269 | 2.401645  | -0.760703 |
| 54 | 1  | 0 | -3.587033 | 4.190133  | -1.757885 |
| 55 | 1  | 0 | 1.179343  | 3.382035  | -3.989375 |
| 56 | 1  | 0 | 2.349964  | 4.977531  | -2.503783 |
| 57 | 1  | 0 | 1.377901  | 5.558301  | -0.313049 |
| 58 | 1  | 0 | -5.767239 | -2.802418 | -0.068136 |
| 59 | 1  | 0 | -5.821866 | -2.791039 | 2.400142  |
| 60 | 1  | 0 | -4.948373 | -0.845339 | 3.646652  |
| 61 | 1  | 0 | 5.437839  | -0.569646 | 3.658501  |
| 62 | 1  | 0 | 5.977644  | 1.044636  | 4.184411  |
| 63 | 1  | 0 | 4.239907  | 0.647021  | 4.154956  |
| 64 | 1  | 0 | 7.009889  | 0.338288  | 1.693305  |
| 65 | 1  | 0 | 6.284031  | 1.542413  | 0.614517  |
| 66 | 1  | 0 | 6.950853  | 2.048714  | 2.177163  |
| 67 | 1  | 0 | -0.198608 | 5.619826  | 1.101491  |
| 68 | 1  | 0 | -2.575611 | 5.801094  | 0.297614  |
| 69 | 1  | 0 | -2.364846 | 5.629005  | 2.043413  |
| 70 | 1  | 0 | -2.926915 | 4.257684  | 1.094723  |
| 71 | 1  | 0 | 0.735844  | 3.489403  | 1.925399  |
| 72 | 1  | 0 | -0.556791 | 4.080300  | 2.983315  |
| 73 | 1  | 0 | -0.846348 | 2.729143  | 1.876878  |
| 74 | 1  | 0 | -3.110825 | 1.970228  | 2.127400  |
| 75 | 1  | 0 | -5.469183 | 2.783585  | 1.869999  |
| 76 | 1  | 0 | -4.753637 | 3.354390  | 3.385358  |
| 77 | 1  | 0 | -5.899365 | 2.003087  | 3.398140  |
| 78 | 1  | 0 | -2.537330 | 0.367592  | 4.021080  |
| 79 | 1  | 0 | -2.874309 | 2.032594  | 4.509849  |
| 80 | 1  | 0 | -4.089225 | 0.785554  | 4.768570  |
| 81 | 1  | 0 | -4.988427 | -2.085678 | -1.967565 |
| 82 | 1  | 0 | -7.154755 | -0.893164 | -1.670287 |
| 83 | 1  | 0 | -6.493727 | -0.669876 | -3.300794 |
| 84 | 1  | 0 | -6.382976 | 0.635944  | -2.116506 |
| 85 | 1  | 0 | -2.853615 | -0.772185 | -2.310828 |
| 86 | 1  | 0 | -3.962499 | -0.849865 | -3.684378 |
| 87 | 1  | 0 | -3.863675 | 0.632195  | -2.743352 |
| 88 | 1  | 0 | -2.002420 | 1.637531  | -3.088318 |
| 89 | 1  | 0 | -2.299772 | 3.590155  | -4.616604 |
| 90 | 1  | 0 | -2.140815 | 2.068414  | -5.511702 |
| 91 | 1  | 0 | -0.778766 | 3.193037  | -5.425891 |
| 92 | 1  | 0 | 0.123214  | 0.338533  | -3.036636 |
| 93 | 1  | 0 | -0.747998 | 0.137102  | -4.558543 |
| 94 | 1  | 0 | 0.677642  | 1.179981  | -4.492197 |

|     |    |   |           |           |           |
|-----|----|---|-----------|-----------|-----------|
| 95  | 1  | 0 | 4.213453  | 1.165460  | -2.359707 |
| 96  | 1  | 0 | 5.279114  | 2.878023  | -3.808710 |
| 97  | 1  | 0 | 6.014233  | 5.048741  | -2.838852 |
| 98  | 1  | 0 | 5.663611  | 5.496224  | -0.416544 |
| 99  | 1  | 0 | 4.584401  | 3.790499  | 1.019343  |
| 100 | 1  | 0 | 2.771782  | -1.228601 | 4.025562  |
| 101 | 1  | 0 | 1.964615  | -1.056635 | 5.639834  |
| 102 | 1  | 0 | 1.814847  | -2.592883 | 4.727279  |
| 103 | 1  | 0 | 0.278063  | -3.543513 | 1.583216  |
| 104 | 1  | 0 | -1.175186 | -2.525642 | 1.427134  |
| 105 | 1  | 0 | -0.682640 | -3.126745 | 3.020844  |
| 106 | 1  | 0 | 0.841327  | -1.676568 | -0.113345 |
| 107 | 7  | 0 | 0.992721  | -2.545714 | -1.024837 |
| 108 | 16 | 0 | 2.554915  | -2.875550 | -1.542966 |
| 109 | 16 | 0 | -0.360850 | -3.040951 | -1.869249 |
| 110 | 6  | 0 | 3.134235  | -3.937801 | -0.114958 |
| 111 | 6  | 0 | -0.512771 | -4.888609 | -1.542504 |
| 112 | 8  | 0 | 3.352355  | -1.656120 | -1.468497 |
| 113 | 8  | 0 | 2.571936  | -3.730547 | -2.722487 |
| 114 | 8  | 0 | -1.497420 | -2.460429 | -1.152893 |
| 115 | 8  | 0 | -0.226005 | -2.891472 | -3.312128 |
| 116 | 9  | 0 | 4.398107  | -4.299151 | -0.338539 |
| 117 | 9  | 0 | 3.061894  | -3.255016 | 1.028760  |
| 118 | 9  | 0 | 2.370385  | -5.031146 | -0.020672 |
| 119 | 9  | 0 | 0.471698  | -5.573916 | -2.112442 |
| 120 | 9  | 0 | -1.682861 | -5.280933 | -2.052601 |
| 121 | 9  | 0 | -0.510481 | -5.121229 | -0.225556 |

Sum of electronic and zero-point Energies= -4417.878981

Sum of electronic and thermal Energies= -4417.807905

Sum of electronic and thermal Enthalpies= -4417.806961

Sum of electronic and thermal Free Energies= -4417.994665

#### A-pa

| Center<br>Number | Atomic<br>Number | Atomic<br>Type | Coordinates (Angstroms) |           |           |
|------------------|------------------|----------------|-------------------------|-----------|-----------|
|                  |                  |                | X                       | Y         | Z         |
| 1                | 6                | 0              | -1.293812               | -0.968297 | -0.205042 |
| 2                | 6                | 0              | 0.899976                | -1.890634 | -0.157300 |
| 3                | 7                | 0              | -2.700043               | -1.076937 | -0.200214 |
| 4                | 6                | 0              | 1.457717                | -0.611166 | -0.148344 |
| 5                | 7                | 0              | -0.790432               | 0.267761  | -0.283683 |
| 6                | 6                | 0              | 0.533114                | 0.470342  | -0.248108 |
| 7                | 7                | 0              | 0.954379                | 1.803324  | -0.271991 |
| 8                | 6                | 0              | -0.046056               | 2.831387  | -0.016836 |
| 9                | 6                | 0              | 1.954374                | 2.223074  | -1.251761 |
| 10               | 6                | 0              | 2.924148                | -0.465555 | 0.060223  |
| 11               | 6                | 0              | 3.829503                | -1.231060 | -0.693310 |
| 12               | 6                | 0              | 5.202851                | -1.158689 | -0.456140 |
| 13               | 6                | 0              | 5.698604                | -0.318148 | 0.540155  |
| 14               | 6                | 0              | 4.809399                | 0.449747  | 1.296460  |
| 15               | 6                | 0              | 3.438480                | 0.378710  | 1.060529  |
| 16               | 6                | 0              | -3.629650               | 1.393669  | -0.999111 |
| 17               | 16               | 0              | -3.667786               | 0.235735  | 0.375917  |
| 18               | 8                | 0              | -3.051789               | 0.859588  | 1.546436  |
| 19               | 8                | 0              | -5.027158               | -0.307831 | 0.465110  |
| 20               | 6                | 0              | -3.317536               | -2.405697 | -0.217759 |
| 21               | 1                | 0              | 1.563444                | -2.746386 | -0.072676 |

|    |   |   |           |           |           |
|----|---|---|-----------|-----------|-----------|
| 22 | 1 | 0 | 0.472005  | 3.744378  | 0.295421  |
| 23 | 1 | 0 | -0.645289 | 3.072117  | -0.909971 |
| 24 | 1 | 0 | -0.724366 | 2.510881  | 0.773380  |
| 25 | 1 | 0 | 2.656349  | 1.420940  | -1.467140 |
| 26 | 1 | 0 | 1.477243  | 2.533062  | -2.195737 |
| 27 | 1 | 0 | 2.521505  | 3.074572  | -0.861291 |
| 28 | 1 | 0 | 3.451496  | -1.878312 | -1.479865 |
| 29 | 1 | 0 | 5.884191  | -1.756794 | -1.054582 |
| 30 | 1 | 0 | 6.767023  | -0.259524 | 0.725631  |
| 31 | 1 | 0 | 5.185375  | 1.102300  | 2.079413  |
| 32 | 1 | 0 | 2.752800  | 0.977556  | 1.650421  |
| 33 | 1 | 0 | -4.097377 | 0.914024  | -1.858948 |
| 34 | 1 | 0 | -4.205428 | 2.265884  | -0.683656 |
| 35 | 1 | 0 | -2.588689 | 1.646207  | -1.190273 |
| 36 | 1 | 0 | -2.970449 | -2.948250 | -1.101799 |
| 37 | 1 | 0 | -4.397096 | -2.287970 | -0.271225 |
| 38 | 1 | 0 | -3.070496 | -2.984424 | 0.680298  |
| 39 | 6 | 0 | -0.475725 | -2.103987 | -0.185322 |
| 40 | 1 | 0 | -0.875749 | -3.107297 | -0.143211 |

Sum of electronic and zero-point Energies= -1295.566471

Sum of electronic and thermal Energies= -1295.545950

Sum of electronic and thermal Enthalpies= -1295.545006

Sum of electronic and thermal Free Energies= -1295.615877

#### A-pb

| Center<br>Number | Atomic<br>Number | Atomic<br>Type | Coordinates (Angstroms) |           |           |
|------------------|------------------|----------------|-------------------------|-----------|-----------|
|                  |                  |                | X                       | Y         | Z         |
| 1                | 6                | 0              | -0.631576               | -0.832631 | 0.303106  |
| 2                | 6                | 0              | 0.675840                | -1.431667 | 0.102151  |
| 3                | 7                | 0              | -3.084328               | -1.137845 | 0.581926  |
| 4                | 6                | 0              | 1.584914                | -0.417597 | 0.038632  |
| 5                | 7                | 0              | -0.515678               | 0.558040  | 0.345729  |
| 6                | 6                | 0              | 0.766921                | 0.815743  | 0.181591  |
| 7                | 7                | 0              | 1.261009                | 2.104946  | 0.210661  |
| 8                | 6                | 0              | 0.315944                | 3.152264  | 0.578784  |
| 9                | 6                | 0              | 2.211083                | 2.524192  | -0.821371 |
| 10               | 6                | 0              | 3.050110                | -0.573373 | -0.014959 |
| 11               | 6                | 0              | 3.898992                | 0.189803  | 0.808009  |
| 12               | 6                | 0              | 5.277120                | -0.016360 | 0.795925  |
| 13               | 6                | 0              | 5.838338                | -0.987603 | -0.035796 |
| 14               | 6                | 0              | 5.008247                | -1.750778 | -0.858645 |
| 15               | 6                | 0              | 3.629750                | -1.544583 | -0.850283 |
| 16               | 6                | 0              | -3.501602               | 1.591242  | 0.420878  |
| 17               | 16               | 0              | -3.772322               | 0.065605  | -0.483154 |
| 18               | 8                | 0              | -5.212915               | -0.212586 | -0.499807 |
| 19               | 8                | 0              | -3.001506               | 0.096533  | -1.723337 |
| 20               | 6                | 0              | -4.016631               | -2.148867 | 1.106530  |
| 21               | 1                | 0              | 0.886039                | -2.493615 | 0.078854  |
| 22               | 1                | 0              | -0.232012               | 2.854237  | 1.473244  |
| 23               | 1                | 0              | 0.876173                | 4.068239  | 0.788064  |
| 24               | 1                | 0              | -0.411658               | 3.358945  | -0.220088 |
| 25               | 1                | 0              | 2.818624                | 3.353061  | -0.444999 |
| 26               | 1                | 0              | 2.875673                | 1.707179  | -1.092152 |
| 27               | 1                | 0              | 1.686407                | 2.862326  | -1.728098 |
| 28               | 1                | 0              | 3.465743                | 0.939083  | 1.463106  |
| 29               | 1                | 0              | 5.914398                | 0.579216  | 1.443492  |

|    |   |   |           |           |           |
|----|---|---|-----------|-----------|-----------|
| 30 | 1 | 0 | 6.912666  | -1.145911 | -0.044545 |
| 31 | 1 | 0 | 5.435104  | -2.503961 | -1.514786 |
| 32 | 1 | 0 | 2.989271  | -2.127966 | -1.505173 |
| 33 | 1 | 0 | -2.423568 | 1.674261  | 0.573381  |
| 34 | 1 | 0 | -3.891922 | 2.394250  | -0.207489 |
| 35 | 1 | 0 | -4.053718 | 1.532718  | 1.359146  |
| 36 | 1 | 0 | -4.065873 | -3.031929 | 0.456697  |
| 37 | 1 | 0 | -5.013307 | -1.720253 | 1.181460  |
| 38 | 1 | 0 | -3.676844 | -2.451313 | 2.100292  |
| 39 | 6 | 0 | -1.771192 | -1.568715 | 0.412030  |
| 40 | 1 | 0 | -1.663236 | -2.652215 | 0.387507  |

Sum of electronic and zero-point Energies= -1295.533642  
Sum of electronic and thermal Energies= -1295.512648  
Sum of electronic and thermal Enthalpies= -1295.511704  
Sum of electronic and thermal Free Energies= -1295.584324

### Cat

| Center<br>Number | Atomic<br>Number | Atomic<br>Type | Coordinates (Angstroms) |           |           |
|------------------|------------------|----------------|-------------------------|-----------|-----------|
|                  |                  |                | X                       | Y         | Z         |
| 1                | 6                | 0              | -1.734241               | 0.353813  | -0.170241 |
| 2                | 7                | 0              | -2.832104               | -0.449591 | -0.266775 |
| 3                | 6                | 0              | -3.971100               | 0.312001  | -0.501959 |
| 4                | 6                | 0              | -3.573564               | 1.606020  | -0.575971 |
| 5                | 7                | 0              | -2.200339               | 1.622289  | -0.355273 |
| 6                | 6                | 0              | -2.854892               | -1.878165 | 0.003382  |
| 7                | 6                | 0              | -1.385600               | 2.820748  | -0.463282 |
| 8                | 6                | 0              | -0.854006               | 3.124642  | -1.735166 |
| 9                | 6                | 0              | -0.079623               | 4.284715  | -1.861810 |
| 10               | 6                | 0              | 0.150994                | 5.114738  | -0.772641 |
| 11               | 6                | 0              | -0.398580               | 4.797807  | 0.465416  |
| 12               | 6                | 0              | -1.180639               | 3.650902  | 0.663315  |
| 13               | 6                | 0              | -2.973407               | -2.274692 | 1.353003  |
| 14               | 6                | 0              | -3.001751               | -3.647104 | 1.630883  |
| 15               | 6                | 0              | -2.921988               | -4.586841 | 0.611851  |
| 16               | 6                | 0              | -2.821287               | -4.165533 | -0.710155 |
| 17               | 6                | 0              | -2.785832               | -2.808444 | -1.059327 |
| 18               | 6                | 0              | -1.698076               | 3.422949  | 2.088838  |
| 19               | 6                | 0              | -3.226311               | 3.288537  | 2.228904  |
| 20               | 6                | 0              | -0.957929               | 2.290667  | 2.825089  |
| 21               | 6                | 0              | -2.666082               | -2.494929 | -2.555378 |
| 22               | 6                | 0              | -1.314436               | -1.875210 | -2.954139 |
| 23               | 6                | 0              | -3.850941               | -1.707885 | -3.148856 |
| 24               | 6                | 0              | -3.091758               | -1.289523 | 2.513395  |
| 25               | 6                | 0              | -4.472025               | -1.398156 | 3.192823  |
| 26               | 6                | 0              | -1.952728               | -1.469367 | 3.535558  |
| 27               | 6                | 0              | -1.089899               | 2.262295  | -2.972392 |
| 28               | 6                | 0              | -1.873541               | 3.034997  | -4.052326 |
| 29               | 6                | 0              | 0.233081                | 1.706642  | -3.534460 |
| 30               | 1                | 0              | -4.945650               | -0.138193 | -0.593103 |
| 31               | 1                | 0              | -4.129424               | 2.511468  | -0.754747 |
| 32               | 1                | 0              | 0.344106                | 4.536410  | -2.828889 |
| 33               | 1                | 0              | 0.754048                | 6.010852  | -0.886104 |
| 34               | 1                | 0              | -0.216833               | 5.453121  | 1.312293  |
| 35               | 1                | 0              | -3.085786               | -3.977579 | 2.661227  |
| 36               | 1                | 0              | -2.939758               | -5.647556 | 0.843986  |
| 37               | 1                | 0              | -2.760035               | -4.906312 | -1.501884 |

|    |    |   |           |           |           |
|----|----|---|-----------|-----------|-----------|
| 38 | 1  | 0 | -1.437988 | 4.348311  | 2.616815  |
| 39 | 1  | 0 | -3.752149 | 4.076015  | 1.678057  |
| 40 | 1  | 0 | -3.502163 | 3.382266  | 3.284566  |
| 41 | 1  | 0 | -3.597530 | 2.321325  | 1.882491  |
| 42 | 1  | 0 | 0.125615  | 2.422150  | 2.779238  |
| 43 | 1  | 0 | -1.255085 | 2.276777  | 3.879599  |
| 44 | 1  | 0 | -1.182215 | 1.309646  | 2.401272  |
| 45 | 1  | 0 | -2.698375 | -3.479689 | -3.036443 |
| 46 | 1  | 0 | -1.230566 | -1.848948 | -4.046668 |
| 47 | 1  | 0 | -1.211047 | -0.851366 | -2.588615 |
| 48 | 1  | 0 | -0.475964 | -2.451474 | -2.555800 |
| 49 | 1  | 0 | -4.811423 | -2.139130 | -2.846618 |
| 50 | 1  | 0 | -3.800771 | -1.742126 | -4.242444 |
| 51 | 1  | 0 | -3.840415 | -0.654539 | -2.857672 |
| 52 | 1  | 0 | -3.009375 | -0.274043 | 2.118177  |
| 53 | 1  | 0 | -5.286011 | -1.232920 | 2.479052  |
| 54 | 1  | 0 | -4.562678 | -0.652756 | 3.989956  |
| 55 | 1  | 0 | -4.620482 | -2.385337 | 3.642817  |
| 56 | 1  | 0 | -0.971937 | -1.349961 | 3.066401  |
| 57 | 1  | 0 | -2.039944 | -0.722854 | 4.331833  |
| 58 | 1  | 0 | -1.984222 | -2.458160 | 4.004601  |
| 59 | 1  | 0 | -1.703224 | 1.404417  | -2.686678 |
| 60 | 1  | 0 | -2.830616 | 3.402793  | -3.667920 |
| 61 | 1  | 0 | -2.079256 | 2.384973  | -4.909220 |
| 62 | 1  | 0 | -1.309069 | 3.898558  | -4.419281 |
| 63 | 1  | 0 | 0.894436  | 2.510653  | -3.874033 |
| 64 | 1  | 0 | 0.770560  | 1.124051  | -2.780527 |
| 65 | 1  | 0 | 0.035731  | 1.054584  | -4.391708 |
| 66 | 7  | 0 | 2.130850  | -0.873476 | 0.569078  |
| 67 | 16 | 0 | 2.986991  | -0.112224 | 1.787886  |
| 68 | 16 | 0 | 2.660536  | -2.260219 | -0.201145 |
| 69 | 8  | 0 | 2.074855  | 0.175449  | 2.893891  |
| 70 | 8  | 0 | 4.302416  | -0.697828 | 2.010270  |
| 71 | 8  | 0 | 3.474929  | -3.121527 | 0.643343  |
| 72 | 8  | 0 | 1.499120  | -2.780588 | -0.924126 |
| 73 | 6  | 0 | 3.310359  | 1.563383  | 1.001190  |
| 74 | 6  | 0 | 3.788811  | -1.604747 | -1.545365 |
| 75 | 9  | 0 | 4.144517  | -2.621620 | -2.332835 |
| 76 | 9  | 0 | 3.135546  | -0.692651 | -2.279212 |
| 77 | 9  | 0 | 4.878283  | -1.046817 | -1.021674 |
| 78 | 9  | 0 | 2.166324  | 2.243564  | 0.837534  |
| 79 | 9  | 0 | 3.900981  | 1.424181  | -0.188144 |
| 80 | 9  | 0 | 4.111228  | 2.255425  | 1.813262  |
| 81 | 79 | 0 | 0.151084  | -0.239484 | 0.177601  |

Sum of electronic and zero-point Energies= -3122.415365  
Sum of electronic and thermal Energies= -3122.366998  
Sum of electronic and thermal Enthalpies= -3122.366054  
Sum of electronic and thermal Free Energies= -3122.502785

### B-r1

| Center<br>Number | Atomic<br>Number | Atomic<br>Type | Coordinates (Angstroms) |           |           |
|------------------|------------------|----------------|-------------------------|-----------|-----------|
|                  |                  |                | X                       | Y         | Z         |
| 1                | 6                | 0              | 1.348090                | -0.644685 | -1.936926 |
| 2                | 6                | 0              | 2.517644                | -0.418790 | -1.476803 |
| 3                | 6                | 0              | 0.885772                | -1.033146 | -3.276266 |
| 4                | 7                | 0              | 3.666100                | -0.293018 | -0.912682 |

|    |    |   |           |           |           |
|----|----|---|-----------|-----------|-----------|
| 5  | 6  | 0 | 0.078311  | -2.061421 | -3.605903 |
| 6  | 79 | 0 | -0.061430 | 0.042078  | -0.495924 |
| 7  | 7  | 0 | -2.473449 | 1.680362  | 0.473678  |
| 8  | 6  | 0 | -3.395923 | 1.771592  | 1.508954  |
| 9  | 6  | 0 | -3.021166 | 0.874440  | 2.455930  |
| 10 | 7  | 0 | -1.887453 | 0.231631  | 1.975626  |
| 11 | 6  | 0 | -2.564280 | 2.460138  | -0.753790 |
| 12 | 6  | 0 | -1.109407 | -0.731267 | 2.735325  |
| 13 | 6  | 0 | -0.029766 | -0.229105 | 3.498514  |
| 14 | 6  | 0 | 0.751222  | -1.148265 | 4.209524  |
| 15 | 6  | 0 | 0.470217  | -2.510364 | 4.170493  |
| 16 | 6  | 0 | -0.620404 | -2.968995 | 3.441038  |
| 17 | 6  | 0 | -1.452777 | -2.100627 | 2.716633  |
| 18 | 6  | 0 | -3.345331 | 1.932187  | -1.804990 |
| 19 | 6  | 0 | -3.448874 | 2.681766  | -2.984097 |
| 20 | 6  | 0 | -2.812092 | 3.908644  | -3.114116 |
| 21 | 6  | 0 | -2.068729 | 4.415329  | -2.052696 |
| 22 | 6  | 0 | -1.924441 | 3.719771  | -0.843869 |
| 23 | 6  | 0 | -0.476388 | -3.124801 | -2.763306 |
| 24 | 6  | 0 | -1.641639 | -3.786587 | -3.200362 |
| 25 | 6  | 0 | -2.205125 | -4.815933 | -2.452240 |
| 26 | 6  | 0 | -1.602395 | -5.223009 | -1.257878 |
| 27 | 6  | 0 | -0.434149 | -4.593824 | -0.823269 |
| 28 | 6  | 0 | 0.129089  | -3.555267 | -1.566040 |
| 29 | 6  | 0 | 4.302743  | -1.197339 | 1.673940  |
| 30 | 16 | 0 | 4.336419  | -1.776905 | -0.028094 |
| 31 | 8  | 0 | 5.716049  | -1.923583 | -0.468674 |
| 32 | 8  | 0 | 3.322096  | -2.799454 | -0.238504 |
| 33 | 6  | 0 | -1.078121 | 4.414208  | 0.230838  |
| 34 | 6  | 0 | -1.749013 | 4.599531  | 1.604417  |
| 35 | 6  | 0 | 0.333679  | 3.811084  | 0.363686  |
| 36 | 6  | 0 | -4.108014 | 0.615253  | -1.704682 |
| 37 | 6  | 0 | -5.630163 | 0.862270  | -1.665162 |
| 38 | 6  | 0 | -3.735282 | -0.358525 | -2.838317 |
| 39 | 6  | 0 | 0.262307  | 1.262731  | 3.645770  |
| 40 | 6  | 0 | 1.738212  | 1.610799  | 3.383076  |
| 41 | 6  | 0 | -0.175712 | 1.763040  | 5.038617  |
| 42 | 6  | 0 | -2.693340 | -2.744487 | 2.086249  |
| 43 | 6  | 0 | -3.151189 | -2.244632 | 0.709312  |
| 44 | 6  | 0 | -3.868418 | -2.729527 | 3.089524  |
| 45 | 1  | 0 | 1.246216  | -0.386950 | -4.073467 |
| 46 | 1  | 0 | -0.186326 | -2.127348 | -4.659859 |
| 47 | 1  | 0 | -4.214463 | 2.471944  | 1.479694  |
| 48 | 1  | 0 | -3.443440 | 0.641891  | 3.419781  |
| 49 | 1  | 0 | 1.575712  | -0.788802 | 4.817306  |
| 50 | 1  | 0 | 1.086274  | -3.211862 | 4.725268  |
| 51 | 1  | 0 | -0.852682 | -4.030094 | 3.439045  |
| 52 | 1  | 0 | -4.045393 | 2.297308  | -3.804957 |
| 53 | 1  | 0 | -2.905106 | 4.478683  | -4.033550 |
| 54 | 1  | 0 | -1.588790 | 5.384285  | -2.154600 |
| 55 | 1  | 0 | -2.103355 | -3.485146 | -4.137009 |
| 56 | 1  | 0 | -3.102857 | -5.313165 | -2.807278 |
| 57 | 1  | 0 | -2.027218 | -6.042728 | -0.685852 |
| 58 | 1  | 0 | 0.060083  | -4.928369 | 0.084119  |
| 59 | 1  | 0 | 1.070504  | -3.125638 | -1.244871 |
| 60 | 1  | 0 | 4.788634  | -1.977887 | 2.263636  |
| 61 | 1  | 0 | 4.869547  | -0.267797 | 1.734979  |
| 62 | 1  | 0 | 3.264204  | -1.067150 | 1.979901  |
| 63 | 1  | 0 | -0.933549 | 5.428259  | -0.159191 |

|     |   |   |           |           |           |
|-----|---|---|-----------|-----------|-----------|
| 64  | 1 | 0 | -2.764236 | 4.995961  | 1.502302  |
| 65  | 1 | 0 | -1.173029 | 5.319776  | 2.194561  |
| 66  | 1 | 0 | -1.800394 | 3.673916  | 2.181965  |
| 67  | 1 | 0 | 0.839789  | 3.783767  | -0.606460 |
| 68  | 1 | 0 | 0.936327  | 4.420807  | 1.046506  |
| 69  | 1 | 0 | 0.304329  | 2.790645  | 0.754759  |
| 70  | 1 | 0 | -3.833764 | 0.129276  | -0.767224 |
| 71  | 1 | 0 | -5.911484 | 1.517066  | -0.834051 |
| 72  | 1 | 0 | -6.166086 | -0.084922 | -1.546150 |
| 73  | 1 | 0 | -5.982676 | 1.330996  | -2.589647 |
| 74  | 1 | 0 | -2.657592 | -0.544612 | -2.865322 |
| 75  | 1 | 0 | -4.241602 | -1.317483 | -2.689503 |
| 76  | 1 | 0 | -4.037535 | 0.024134  | -3.818595 |
| 77  | 1 | 0 | -0.327827 | 1.806716  | 2.904757  |
| 78  | 1 | 0 | 2.055716  | 1.270651  | 2.391862  |
| 79  | 1 | 0 | 1.883698  | 2.694587  | 3.431162  |
| 80  | 1 | 0 | 2.404377  | 1.161969  | 4.126950  |
| 81  | 1 | 0 | 0.391319  | 1.268058  | 5.833738  |
| 82  | 1 | 0 | -1.237382 | 1.568469  | 5.218926  |
| 83  | 1 | 0 | -0.009329 | 2.841457  | 5.128106  |
| 84  | 1 | 0 | -2.414275 | -3.795583 | 1.947314  |
| 85  | 1 | 0 | -2.320485 | -2.162726 | 0.004500  |
| 86  | 1 | 0 | -3.868078 | -2.959751 | 0.294139  |
| 87  | 1 | 0 | -3.660902 | -1.280735 | 0.773419  |
| 88  | 1 | 0 | -3.579987 | -3.155534 | 4.054747  |
| 89  | 1 | 0 | -4.706906 | -3.313539 | 2.696616  |
| 90  | 1 | 0 | -4.230570 | -1.710700 | 3.264548  |
| 91  | 6 | 0 | -1.548398 | 0.717078  | 0.747716  |
| 92  | 6 | 0 | 4.452023  | 0.930475  | -0.930989 |
| 93  | 6 | 0 | 3.937719  | 2.070509  | -0.307108 |
| 94  | 6 | 0 | 5.694289  | 0.942713  | -1.569355 |
| 95  | 6 | 0 | 4.683799  | 3.248361  | -0.330990 |
| 96  | 1 | 0 | 2.964778  | 2.035685  | 0.172448  |
| 97  | 6 | 0 | 6.432139  | 2.127102  | -1.575566 |
| 98  | 1 | 0 | 6.072035  | 0.045806  | -2.045176 |
| 99  | 6 | 0 | 5.930579  | 3.276240  | -0.960665 |
| 100 | 1 | 0 | 4.291145  | 4.141993  | 0.143604  |
| 101 | 1 | 0 | 7.397951  | 2.149988  | -2.069741 |
| 102 | 1 | 0 | 6.509588  | 4.194179  | -0.974575 |

Sum of electronic and zero-point Energies= -2554.973832  
Sum of electronic and thermal Energies= -2554.920534  
Sum of electronic and thermal Enthalpies= -2554.919590  
Sum of electronic and thermal Free Energies= -2555.068591

### B-tsal

| Center<br>Number | Atomic<br>Number | Atomic<br>Type | Coordinates (Angstroms) |           |           |
|------------------|------------------|----------------|-------------------------|-----------|-----------|
|                  |                  |                | X                       | Y         | Z         |
| 1                | 6                | 0              | 1.685469                | -0.433904 | -0.038640 |
| 2                | 6                | 0              | 1.837038                | -1.736421 | 0.072875  |
| 3                | 6                | 0              | 2.720252                | 0.589235  | -0.161480 |
| 4                | 7                | 0              | 1.168481                | -2.889639 | 0.004677  |
| 5                | 6                | 0              | 3.763382                | 0.537290  | -1.019710 |
| 6                | 79               | 0              | -0.284901               | 0.288632  | 0.024885  |
| 7                | 6                | 0              | -2.134344               | 1.189894  | 0.102275  |
| 8                | 7                | 0              | -3.372489               | 0.681357  | -0.159374 |
| 9                | 6                | 0              | -4.346838               | 1.660778  | 0.004569  |

|    |    |   |           |           |           |
|----|----|---|-----------|-----------|-----------|
| 10 | 6  | 0 | -3.705970 | 2.802964  | 0.352217  |
| 11 | 7  | 0 | -2.351765 | 2.498326  | 0.424152  |
| 12 | 6  | 0 | -3.700847 | -0.710692 | -0.418805 |
| 13 | 6  | 0 | -1.319999 | 3.493858  | 0.659114  |
| 14 | 6  | 0 | -0.908945 | 3.800341  | 1.977709  |
| 15 | 6  | 0 | 0.078993  | 4.786201  | 2.115315  |
| 16 | 6  | 0 | 0.627959  | 5.441835  | 1.017037  |
| 17 | 6  | 0 | 0.189689  | 5.129119  | -0.263587 |
| 18 | 6  | 0 | -0.794484 | 4.154252  | -0.472993 |
| 19 | 6  | 0 | -3.942459 | -1.532644 | 0.704749  |
| 20 | 6  | 0 | -4.312903 | -2.863595 | 0.473086  |
| 21 | 6  | 0 | -4.454189 | -3.353832 | -0.819531 |
| 22 | 6  | 0 | -4.223592 | -2.515837 | -1.906687 |
| 23 | 6  | 0 | -3.842545 | -1.175232 | -1.746934 |
| 24 | 7  | 0 | 3.660708  | -2.258133 | 0.291805  |
| 25 | 6  | 0 | 4.336257  | -1.955301 | 1.211613  |
| 26 | 7  | 0 | 5.095502  | -1.636698 | 2.216514  |
| 27 | 6  | 0 | 4.893373  | -2.272046 | 3.531546  |
| 28 | 6  | 0 | 6.201713  | -0.679142 | 2.046719  |
| 29 | 6  | 0 | -1.417886 | 3.164525  | 3.277778  |
| 30 | 6  | 0 | -2.937893 | 3.251560  | 3.512405  |
| 31 | 6  | 0 | -0.892909 | 1.732849  | 3.499263  |
| 32 | 6  | 0 | -1.266162 | 3.879520  | -1.899115 |
| 33 | 6  | 0 | -2.000502 | 5.103190  | -2.484152 |
| 34 | 6  | 0 | -0.106024 | 3.440007  | -2.812776 |
| 35 | 6  | 0 | 1.835663  | -5.340406 | 1.132623  |
| 36 | 16 | 0 | 0.948264  | -3.815561 | 1.492457  |
| 37 | 8  | 0 | -0.473078 | -4.121517 | 1.630680  |
| 38 | 8  | 0 | 1.663726  | -3.067201 | 2.527887  |
| 39 | 6  | 0 | 4.799377  | 1.556364  | -1.216774 |
| 40 | 6  | 0 | 5.873134  | 1.263569  | -2.080039 |
| 41 | 6  | 0 | 6.901130  | 2.181174  | -2.290567 |
| 42 | 6  | 0 | 6.876180  | 3.417422  | -1.643991 |
| 43 | 6  | 0 | 5.813543  | 3.728188  | -0.788464 |
| 44 | 6  | 0 | 4.787910  | 2.812615  | -0.576371 |
| 45 | 6  | 0 | -3.614866 | -0.376369 | -3.036309 |
| 46 | 6  | 0 | -4.462461 | 0.900693  | -3.189527 |
| 47 | 6  | 0 | -2.125186 | -0.107151 | -3.322776 |
| 48 | 6  | 0 | -3.876310 | -1.020900 | 2.141903  |
| 49 | 6  | 0 | -5.296480 | -0.817889 | 2.711218  |
| 50 | 6  | 0 | -3.046462 | -1.937672 | 3.059541  |
| 51 | 1  | 0 | 2.557175  | 1.482357  | 0.437119  |
| 52 | 1  | 0 | 3.863475  | -0.347620 | -1.645273 |
| 53 | 1  | 0 | -5.392554 | 1.451758  | -0.149406 |
| 54 | 1  | 0 | -4.079018 | 3.792320  | 0.559848  |
| 55 | 1  | 0 | 0.415773  | 5.047434  | 3.114424  |
| 56 | 1  | 0 | 1.385408  | 6.206266  | 1.163742  |
| 57 | 1  | 0 | 0.607341  | 5.653340  | -1.117201 |
| 58 | 1  | 0 | -4.503940 | -3.516133 | 1.318246  |
| 59 | 1  | 0 | -4.757256 | -4.384231 | -0.981394 |
| 60 | 1  | 0 | -4.350719 | -2.901588 | -2.914183 |
| 61 | 1  | 0 | 3.946220  | -2.811602 | 3.526843  |
| 62 | 1  | 0 | 5.720295  | -2.954833 | 3.750713  |
| 63 | 1  | 0 | 4.856128  | -1.491306 | 4.296181  |
| 64 | 1  | 0 | 6.146348  | -0.225948 | 1.056786  |
| 65 | 1  | 0 | 6.114741  | 0.104037  | 2.804793  |
| 66 | 1  | 0 | 7.161289  | -1.192249 | 2.163626  |
| 67 | 1  | 0 | -0.966141 | 3.776128  | 4.067742  |
| 68 | 1  | 0 | -3.316231 | 4.260543  | 3.318427  |



|     |   |   |           |           |           |
|-----|---|---|-----------|-----------|-----------|
| 69  | 1 | 0 | -3.156585 | 3.012882  | 4.558277  |
| 70  | 1 | 0 | -3.501385 | 2.548535  | 2.894986  |
| 71  | 1 | 0 | 0.198359  | 1.696382  | 3.424099  |
| 72  | 1 | 0 | -1.174582 | 1.383141  | 4.498472  |
| 73  | 1 | 0 | -1.297731 | 1.027855  | 2.769280  |
| 74  | 1 | 0 | -1.982533 | 3.054687  | -1.875302 |
| 75  | 1 | 0 | -2.852248 | 5.396482  | -1.862162 |
| 76  | 1 | 0 | -2.375597 | 4.877305  | -3.487593 |
| 77  | 1 | 0 | -1.335018 | 5.968821  | -2.564957 |
| 78  | 1 | 0 | 0.398339  | 2.553924  | -2.414993 |
| 79  | 1 | 0 | -0.484668 | 3.198217  | -3.811200 |
| 80  | 1 | 0 | 0.641801  | 4.231206  | -2.927989 |
| 81  | 1 | 0 | 1.740244  | -5.964363 | 2.023323  |
| 82  | 1 | 0 | 1.370867  | -5.826503 | 0.275225  |
| 83  | 1 | 0 | 2.878614  | -5.094694 | 0.932166  |
| 84  | 1 | 0 | 5.893843  | 0.304684  | -2.592164 |
| 85  | 1 | 0 | 7.717385  | 1.932872  | -2.962327 |
| 86  | 1 | 0 | 7.672295  | 4.137040  | -1.808620 |
| 87  | 1 | 0 | 5.784419  | 4.692641  | -0.289790 |
| 88  | 1 | 0 | 3.965387  | 3.081248  | 0.079660  |
| 89  | 1 | 0 | -3.957480 | -1.049387 | -3.831243 |
| 90  | 1 | 0 | -5.515363 | 0.714144  | -2.954009 |
| 91  | 1 | 0 | -4.412853 | 1.245041  | -4.227645 |
| 92  | 1 | 0 | -4.110058 | 1.719929  | -2.558876 |
| 93  | 1 | 0 | -2.012199 | 0.341116  | -4.316055 |
| 94  | 1 | 0 | -1.683825 | 0.575751  | -2.592552 |
| 95  | 1 | 0 | -1.546839 | -1.035595 | -3.301521 |
| 96  | 1 | 0 | -3.383551 | -0.045471 | 2.137179  |
| 97  | 1 | 0 | -5.882754 | -0.120896 | 2.103859  |
| 98  | 1 | 0 | -5.245541 | -0.418420 | 3.729403  |
| 99  | 1 | 0 | -5.843625 | -1.765665 | 2.750213  |
| 100 | 1 | 0 | -2.054024 | -2.135432 | 2.646874  |
| 101 | 1 | 0 | -2.927187 | -1.468068 | 4.041400  |
| 102 | 1 | 0 | -3.535560 | -2.903616 | 3.221244  |
| 103 | 6 | 0 | 0.800203  | -3.496615 | -1.258053 |
| 104 | 6 | 0 | 1.791279  | -3.729007 | -2.218629 |
| 105 | 6 | 0 | -0.533978 | -3.835671 | -1.501047 |
| 106 | 6 | 0 | 1.436634  | -4.298157 | -3.441166 |
| 107 | 1 | 0 | 2.820579  | -3.462367 | -2.004159 |
| 108 | 6 | 0 | -0.869353 | -4.421499 | -2.723507 |
| 109 | 1 | 0 | -1.289934 | -3.643049 | -0.749246 |
| 110 | 6 | 0 | 0.108340  | -4.650330 | -3.693505 |
| 111 | 1 | 0 | 2.200334  | -4.474719 | -4.192293 |
| 112 | 1 | 0 | -1.903813 | -4.686590 | -2.917163 |
| 113 | 1 | 0 | -0.162727 | -5.100267 | -4.643561 |

Sum of electronic and zero-point Energies= -2782.291758  
Sum of electronic and thermal Energies= -2782.231433  
Sum of electronic and thermal Enthalpies= -2782.230489  
Sum of electronic and thermal Free Energies= -2782.396553

### B-tsb1

| Center Number | Atomic Number | Atomic Type | Coordinates (Angstroms) |           |           |
|---------------|---------------|-------------|-------------------------|-----------|-----------|
|               |               |             | X                       | Y         | Z         |
| 1             | 6             | 0           | 2.315438                | -0.752268 | -0.928032 |
| 2             | 6             | 0           | 1.317036                | -1.383474 | -0.378341 |
| 3             | 6             | 0           | 2.897757                | 0.467433  | -1.372606 |

|    |    |   |           |           |           |
|----|----|---|-----------|-----------|-----------|
| 4  | 7  | 0 | 1.293028  | -2.738115 | 0.054313  |
| 5  | 6  | 0 | 3.286076  | 1.437376  | -0.504504 |
| 6  | 79 | 0 | -0.367202 | -0.151487 | -0.097663 |
| 7  | 6  | 0 | -2.068048 | 0.958603  | 0.262864  |
| 8  | 7  | 0 | -2.517362 | 1.417480  | 1.466656  |
| 9  | 6  | 0 | -3.708484 | 2.116655  | 1.309671  |
| 10 | 6  | 0 | -4.019000 | 2.076272  | -0.009070 |
| 11 | 7  | 0 | -2.999496 | 1.375082  | -0.643116 |
| 12 | 6  | 0 | -1.796245 | 1.353337  | 2.727320  |
| 13 | 6  | 0 | -3.043819 | 1.009113  | -2.048710 |
| 14 | 6  | 0 | -2.473554 | 1.854829  | -3.028140 |
| 15 | 6  | 0 | -2.571753 | 1.429752  | -4.360762 |
| 16 | 6  | 0 | -3.210126 | 0.244381  | -4.713257 |
| 17 | 6  | 0 | -3.785328 | -0.548975 | -3.728818 |
| 18 | 6  | 0 | -3.720104 | -0.185777 | -2.377524 |
| 19 | 6  | 0 | -0.917124 | 2.420278  | 3.015128  |
| 20 | 6  | 0 | -0.217657 | 2.383124  | 4.227614  |
| 21 | 6  | 0 | -0.388325 | 1.333147  | 5.121222  |
| 22 | 6  | 0 | -1.282583 | 0.310298  | 4.822627  |
| 23 | 6  | 0 | -2.019678 | 0.288130  | 3.629637  |
| 24 | 7  | 0 | 3.778504  | -2.094336 | -1.281857 |
| 25 | 6  | 0 | 4.875762  | -1.886111 | -0.900255 |
| 26 | 7  | 0 | 6.080122  | -1.655172 | -0.456642 |
| 27 | 6  | 0 | 6.435038  | -1.996095 | 0.932792  |
| 28 | 6  | 0 | 7.143452  | -1.199124 | -1.363639 |
| 29 | 6  | 0 | -1.765363 | 3.194516  | -2.792388 |
| 30 | 6  | 0 | -2.608266 | 4.264448  | -2.072291 |
| 31 | 6  | 0 | -0.370818 | 3.050598  | -2.155274 |
| 32 | 6  | 0 | -4.417463 | -1.063987 | -1.341276 |
| 33 | 6  | 0 | -5.950409 | -0.963761 | -1.483730 |
| 34 | 6  | 0 | -3.951520 | -2.529329 | -1.410873 |
| 35 | 6  | 0 | -2.983811 | -0.890810 | 3.450457  |
| 36 | 6  | 0 | -4.451356 | -0.509684 | 3.179165  |
| 37 | 6  | 0 | -2.475754 | -1.946898 | 2.451278  |
| 38 | 6  | 0 | -0.727489 | 3.621291  | 2.091178  |
| 39 | 6  | 0 | 0.747025  | 3.813368  | 1.692453  |
| 40 | 6  | 0 | -1.300098 | 4.904326  | 2.727343  |
| 41 | 6  | 0 | 3.905907  | 2.716294  | -0.829463 |
| 42 | 6  | 0 | 4.338263  | 3.537956  | 0.230774  |
| 43 | 6  | 0 | 4.954091  | 4.762103  | -0.017477 |
| 44 | 6  | 0 | 5.144022  | 5.191493  | -1.332298 |
| 45 | 6  | 0 | 4.713856  | 4.391158  | -2.397300 |
| 46 | 6  | 0 | 4.101587  | 3.167737  | -2.151649 |
| 47 | 6  | 0 | 2.830407  | -4.721462 | 1.124057  |
| 48 | 16 | 0 | 2.087439  | -3.129585 | 1.523372  |
| 49 | 8  | 0 | 1.120295  | -3.332550 | 2.606607  |
| 50 | 8  | 0 | 3.152604  | -2.134884 | 1.701784  |
| 51 | 1  | 0 | 3.070124  | 0.565739  | -2.442513 |
| 52 | 1  | 0 | 3.122288  | 1.245896  | 0.554442  |
| 53 | 1  | 0 | -4.217853 | 2.565715  | 2.146361  |
| 54 | 1  | 0 | -4.857115 | 2.477677  | -0.554596 |
| 55 | 1  | 0 | -2.142918 | 2.055062  | -5.138543 |
| 56 | 1  | 0 | -3.271561 | -0.049648 | -5.756862 |
| 57 | 1  | 0 | -4.301513 | -1.461568 | -4.008639 |
| 58 | 1  | 0 | 0.461615  | 3.192922  | 4.474730  |
| 59 | 1  | 0 | 0.161660  | 1.317045  | 6.057369  |
| 60 | 1  | 0 | -1.423430 | -0.497890 | 5.534079  |
| 61 | 1  | 0 | 5.522328  | -2.186010 | 1.498053  |
| 62 | 1  | 0 | 7.085558  | -2.876931 | 0.950474  |

|     |   |   |           |           |           |
|-----|---|---|-----------|-----------|-----------|
| 63  | 1 | 0 | 6.965652  | -1.149034 | 1.376466  |
| 64  | 1 | 0 | 6.718250  | -0.966244 | -2.339905 |
| 65  | 1 | 0 | 7.611738  | -0.301264 | -0.950240 |
| 66  | 1 | 0 | 7.901095  | -1.981232 | -1.477559 |
| 67  | 1 | 0 | -1.595344 | 3.587477  | -3.801796 |
| 68  | 1 | 0 | -2.120682 | 5.239842  | -2.171543 |
| 69  | 1 | 0 | -2.719424 | 4.064121  | -1.004071 |
| 70  | 1 | 0 | -3.607412 | 4.348323  | -2.511896 |
| 71  | 1 | 0 | -0.424317 | 2.700889  | -1.121803 |
| 72  | 1 | 0 | 0.244775  | 2.338597  | -2.713550 |
| 73  | 1 | 0 | 0.141637  | 4.018996  | -2.157871 |
| 74  | 1 | 0 | -4.159473 | -0.696774 | -0.344799 |
| 75  | 1 | 0 | -6.298867 | 0.069592  | -1.387161 |
| 76  | 1 | 0 | -6.444742 | -1.561200 | -0.710785 |
| 77  | 1 | 0 | -6.283790 | -1.336018 | -2.458042 |
| 78  | 1 | 0 | -2.867132 | -2.611321 | -1.300116 |
| 79  | 1 | 0 | -4.420743 | -3.108819 | -0.609278 |
| 80  | 1 | 0 | -4.229332 | -3.000255 | -2.359330 |
| 81  | 1 | 0 | -2.986381 | -1.382237 | 4.430476  |
| 82  | 1 | 0 | -4.800615 | 0.263365  | 3.871672  |
| 83  | 1 | 0 | -5.086132 | -1.390429 | 3.321012  |
| 84  | 1 | 0 | -4.613773 | -0.155023 | 2.158626  |
| 85  | 1 | 0 | -3.125258 | -2.828896 | 2.484300  |
| 86  | 1 | 0 | -2.474993 | -1.572248 | 1.424284  |
| 87  | 1 | 0 | -1.457312 | -2.262958 | 2.693995  |
| 88  | 1 | 0 | -1.284322 | 3.442512  | 1.167918  |
| 89  | 1 | 0 | 1.143797  | 2.912233  | 1.215858  |
| 90  | 1 | 0 | 0.844600  | 4.643908  | 0.985905  |
| 91  | 1 | 0 | 1.374381  | 4.043252  | 2.559952  |
| 92  | 1 | 0 | -2.360789 | 4.791749  | 2.973051  |
| 93  | 1 | 0 | -1.200009 | 5.749774  | 2.038722  |
| 94  | 1 | 0 | -0.772214 | 5.161752  | 3.651389  |
| 95  | 1 | 0 | 4.189265  | 3.204179  | 1.254160  |
| 96  | 1 | 0 | 5.283390  | 5.380779  | 0.811533  |
| 97  | 1 | 0 | 5.620889  | 6.146707  | -1.529673 |
| 98  | 1 | 0 | 4.855070  | 4.727820  | -3.419778 |
| 99  | 1 | 0 | 3.763657  | 2.565426  | -2.989121 |
| 100 | 1 | 0 | 3.518285  | -4.579287 | 0.291135  |
| 101 | 1 | 0 | 3.352006  | -5.046720 | 2.026093  |
| 102 | 1 | 0 | 2.044643  | -5.430501 | 0.865649  |
| 103 | 6 | 0 | 0.328772  | -3.636419 | -0.522005 |
| 104 | 6 | 0 | 0.272816  | -3.698710 | -1.922812 |
| 105 | 6 | 0 | -0.506686 | -4.459701 | 0.246072  |
| 106 | 6 | 0 | -0.610408 | -4.576620 | -2.547372 |
| 107 | 1 | 0 | 0.932877  | -3.068437 | -2.508530 |
| 108 | 6 | 0 | -1.366496 | -5.355608 | -0.394625 |
| 109 | 1 | 0 | -0.488381 | -4.398884 | 1.326961  |
| 110 | 6 | 0 | -1.426377 | -5.417888 | -1.786774 |
| 111 | 1 | 0 | -0.644921 | -4.616301 | -3.632020 |
| 112 | 1 | 0 | -2.002953 | -5.997838 | 0.206867  |
| 113 | 1 | 0 | -2.101674 | -6.113553 | -2.274984 |

---

Sum of electronic and zero-point Energies= -2782.275726  
Sum of electronic and thermal Energies= -2782.215250  
Sum of electronic and thermal Enthalpies= -2782.214306  
Sum of electronic and thermal Free Energies= -2782.380815

B-a1

---

| Center<br>Number | Atomic<br>Number | Atomic<br>Type | Coordinates (Angstroms) |           |           |
|------------------|------------------|----------------|-------------------------|-----------|-----------|
|                  |                  |                | X                       | Y         | Z         |
| 1                | 6                | 0              | 1.904469                | 0.378685  | -0.319252 |
| 2                | 6                | 0              | 2.784225                | -0.649003 | -0.008592 |
| 3                | 6                | 0              | 2.487523                | 1.662352  | -0.642880 |
| 4                | 7                | 0              | 2.427061                | -2.024102 | 0.048485  |
| 5                | 6                | 0              | 1.793547                | 2.689265  | -1.201280 |
| 6                | 79               | 0              | -0.151341               | 0.185067  | -0.099911 |
| 7                | 6                | 0              | -2.197814               | 0.205894  | 0.294785  |
| 8                | 7                | 0              | -3.225736               | -0.482379 | -0.286509 |
| 9                | 6                | 0              | -4.446943               | -0.103254 | 0.261574  |
| 10               | 6                | 0              | -4.184352               | 0.842726  | 1.193365  |
| 11               | 7                | 0              | -2.806022               | 1.018192  | 1.212343  |
| 12               | 6                | 0              | -3.120393               | -1.595696 | -1.213664 |
| 13               | 6                | 0              | -2.160010               | 2.043234  | 2.015654  |
| 14               | 6                | 0              | -1.668390               | 1.737357  | 3.305464  |
| 15               | 6                | 0              | -1.062669               | 2.787040  | 4.012269  |
| 16               | 6                | 0              | -0.968560               | 4.072847  | 3.490484  |
| 17               | 6                | 0              | -1.502051               | 4.350817  | 2.237676  |
| 18               | 6                | 0              | -2.112081               | 3.348072  | 1.474329  |
| 19               | 6                | 0              | -3.149608               | -2.894114 | -0.654951 |
| 20               | 6                | 0              | -3.093766               | -3.983611 | -1.533677 |
| 21               | 6                | 0              | -3.017990               | -3.794300 | -2.908253 |
| 22               | 6                | 0              | -3.021982               | -2.504778 | -3.430008 |
| 23               | 6                | 0              | -3.090366               | -1.369477 | -2.609154 |
| 24               | 7                | 0              | 4.114972                | -0.379370 | 0.233368  |
| 25               | 6                | 0              | 5.216746                | -0.649780 | 0.578642  |
| 26               | 7                | 0              | 6.318909                | -0.819172 | 1.229742  |
| 27               | 6                | 0              | 6.328120                | -0.743042 | 2.711925  |
| 28               | 6                | 0              | 7.606317                | -1.030604 | 0.541839  |
| 29               | 6                | 0              | -1.757258               | 0.390215  | 4.033839  |
| 30               | 6                | 0              | -3.193065               | -0.131388 | 4.238616  |
| 31               | 6                | 0              | -0.833987               | -0.701592 | 3.465775  |
| 32               | 6                | 0              | -2.753812               | 3.713696  | 0.136804  |
| 33               | 6                | 0              | -4.131901               | 4.374303  | 0.356743  |
| 34               | 6                | 0              | -1.864331               | 4.624686  | -0.727462 |
| 35               | 6                | 0              | 3.298391                | -4.320508 | 1.296489  |
| 36               | 16               | 0              | 2.382576                | -2.792138 | 1.576105  |
| 37               | 8                | 0              | 1.016896                | -3.162397 | 1.952021  |
| 38               | 8                | 0              | 3.168637                | -1.922034 | 2.462273  |
| 39               | 6                | 0              | 2.334395                | 3.979073  | -1.618891 |
| 40               | 6                | 0              | 1.590585                | 4.769521  | -2.517651 |
| 41               | 6                | 0              | 2.072858                | 5.998245  | -2.961646 |
| 42               | 6                | 0              | 3.304513                | 6.470478  | -2.504251 |
| 43               | 6                | 0              | 4.049976                | 5.705764  | -1.600112 |
| 44               | 6                | 0              | 3.573553                | 4.474933  | -1.162967 |
| 45               | 6                | 0              | -3.175007               | -0.017711 | -3.330329 |
| 46               | 6                | 0              | -4.402123               | 0.837525  | -2.961130 |
| 47               | 6                | 0              | -1.876260               | 0.807886  | -3.277576 |
| 48               | 6                | 0              | -3.332326               | -3.159555 | 0.839870  |
| 49               | 6                | 0              | -4.765237               | -3.661977 | 1.120998  |
| 50               | 6                | 0              | -2.296339               | -4.142839 | 1.413258  |
| 51               | 1                | 0              | 3.562196                | 1.784606  | -0.511610 |
| 52               | 1                | 0              | 0.737046                | 2.524609  | -1.404297 |
| 53               | 1                | 0              | -5.375635               | -0.540603 | -0.065424 |
| 54               | 1                | 0              | -4.837492               | 1.396749  | 1.846827  |
| 55               | 1                | 0              | -0.668959               | 2.584527  | 5.004065  |
| 56               | 1                | 0              | -0.497642               | 4.861429  | 4.069960  |

|     |   |   |           |           |           |
|-----|---|---|-----------|-----------|-----------|
| 57  | 1 | 0 | -1.451803 | 5.361720  | 1.847474  |
| 58  | 1 | 0 | -3.128867 | -4.991237 | -1.131949 |
| 59  | 1 | 0 | -2.983090 | -4.649717 | -3.576760 |
| 60  | 1 | 0 | -2.993717 | -2.365957 | -4.506835 |
| 61  | 1 | 0 | 5.303903  | -0.813834 | 3.075975  |
| 62  | 1 | 0 | 6.908524  | -1.585277 | 3.097168  |
| 63  | 1 | 0 | 6.790512  | 0.195715  | 3.030225  |
| 64  | 1 | 0 | 7.443607  | -1.063782 | -0.535193 |
| 65  | 1 | 0 | 8.288073  | -0.209264 | 0.780936  |
| 66  | 1 | 0 | 8.047258  | -1.974080 | 0.875107  |
| 67  | 1 | 0 | -1.380280 | 0.608267  | 5.040231  |
| 68  | 1 | 0 | -3.851345 | 0.649750  | 4.633065  |
| 69  | 1 | 0 | -3.181835 | -0.952573 | 4.962736  |
| 70  | 1 | 0 | -3.634177 | -0.518179 | 3.316708  |
| 71  | 1 | 0 | 0.196198  | -0.346216 | 3.374317  |
| 72  | 1 | 0 | -0.829635 | -1.569695 | 4.133018  |
| 73  | 1 | 0 | -1.151804 | -1.045963 | 2.479879  |
| 74  | 1 | 0 | -2.913274 | 2.792621  | -0.431011 |
| 75  | 1 | 0 | -4.813103 | 3.724990  | 0.914345  |
| 76  | 1 | 0 | -4.602022 | 4.609454  | -0.603926 |
| 77  | 1 | 0 | -4.029623 | 5.308291  | 0.919275  |
| 78  | 1 | 0 | -0.856884 | 4.216477  | -0.837913 |
| 79  | 1 | 0 | -2.303800 | 4.736378  | -1.724137 |
| 80  | 1 | 0 | -1.770575 | 5.629446  | -0.303480 |
| 81  | 1 | 0 | 3.275941  | -4.859505 | 2.245179  |
| 82  | 1 | 0 | 2.804170  | -4.901425 | 0.518509  |
| 83  | 1 | 0 | 4.321912  | -4.075613 | 1.012629  |
| 84  | 1 | 0 | 0.633257  | 4.402780  | -2.877272 |
| 85  | 1 | 0 | 1.488449  | 6.588075  | -3.661181 |
| 86  | 1 | 0 | 3.680241  | 7.431145  | -2.843088 |
| 87  | 1 | 0 | 5.001677  | 6.077513  | -1.232234 |
| 88  | 1 | 0 | 4.151935  | 3.903029  | -0.444010 |
| 89  | 1 | 0 | -3.313639 | -0.288421 | -4.383759 |
| 90  | 1 | 0 | -5.324268 | 0.248193  | -2.992040 |
| 91  | 1 | 0 | -4.507230 | 1.653717  | -3.683469 |
| 92  | 1 | 0 | -4.317976 | 1.288416  | -1.969528 |
| 93  | 1 | 0 | -1.955737 | 1.662954  | -3.958522 |
| 94  | 1 | 0 | -1.676687 | 1.191047  | -2.273648 |
| 95  | 1 | 0 | -1.012439 | 0.209257  | -3.581777 |
| 96  | 1 | 0 | -3.202906 | -2.217573 | 1.378768  |
| 97  | 1 | 0 | -5.523398 | -2.961159 | 0.757689  |
| 98  | 1 | 0 | -4.917219 | -3.796549 | 2.196817  |
| 99  | 1 | 0 | -4.947284 | -4.625741 | 0.633950  |
| 100 | 1 | 0 | -1.276676 | -3.766272 | 1.307997  |
| 101 | 1 | 0 | -2.481789 | -4.290709 | 2.482152  |
| 102 | 1 | 0 | -2.357277 | -5.127053 | 0.937037  |
| 103 | 6 | 0 | 2.080789  | -2.731318 | -1.155664 |
| 104 | 6 | 0 | 2.889930  | -2.559698 | -2.288775 |
| 105 | 6 | 0 | 0.978601  | -3.591687 | -1.212915 |
| 106 | 6 | 0 | 2.592579  | -3.237458 | -3.468708 |
| 107 | 1 | 0 | 3.744108  | -1.891584 | -2.246031 |
| 108 | 6 | 0 | 0.709316  | -4.289279 | -2.392977 |
| 109 | 1 | 0 | 0.333709  | -3.704061 | -0.350692 |
| 110 | 6 | 0 | 1.506711  | -4.114755 | -3.523308 |
| 111 | 1 | 0 | 3.221025  | -3.090625 | -4.342011 |
| 112 | 1 | 0 | -0.148654 | -4.952421 | -2.427530 |
| 113 | 1 | 0 | 1.284014  | -4.652030 | -4.439754 |

---

Sum of electronic and zero-point Energies= -2782.306485

Sum of electronic and thermal Energies= -2782.246496  
 Sum of electronic and thermal Enthalpies= -2782.245552  
 Sum of electronic and thermal Free Energies= -2782.409040

**B-b1**

| Center<br>Number | Atomic<br>Number | Atomic<br>Type | Coordinates (Angstroms) |           |           |
|------------------|------------------|----------------|-------------------------|-----------|-----------|
|                  |                  |                | X                       | Y         | Z         |
| 1                | 6                | 0              | 2.644657                | -0.565839 | -0.551400 |
| 2                | 6                | 0              | 1.439441                | -1.194393 | -0.308537 |
| 3                | 6                | 0              | 2.811260                | 0.870297  | -0.756707 |
| 4                | 7                | 0              | 1.491404                | -2.619862 | -0.081183 |
| 5                | 6                | 0              | 3.985238                | 1.532958  | -0.819610 |
| 6                | 79               | 0              | -0.354596               | -0.193779 | -0.078700 |
| 7                | 6                | 0              | -2.102704               | 0.855506  | 0.326081  |
| 8                | 7                | 0              | -2.459721               | 1.360438  | 1.543408  |
| 9                | 6                | 0              | -3.660398               | 2.054589  | 1.456180  |
| 10               | 6                | 0              | -4.074296               | 1.964793  | 0.169012  |
| 11               | 7                | 0              | -3.106497               | 1.238746  | -0.517402 |
| 12               | 6                | 0              | -1.654079               | 1.322032  | 2.753714  |
| 13               | 6                | 0              | -3.274668               | 0.811655  | -1.896147 |
| 14               | 6                | 0              | -2.792187               | 1.608049  | -2.960165 |
| 15               | 6                | 0              | -2.997992               | 1.119149  | -4.258230 |
| 16               | 6                | 0              | -3.663985               | -0.078603 | -4.499257 |
| 17               | 6                | 0              | -4.164270               | -0.815991 | -3.433681 |
| 18               | 6                | 0              | -3.987833               | -0.388066 | -2.111677 |
| 19               | 6                | 0              | -0.741762               | 2.381340  | 2.952704  |
| 20               | 6                | 0              | 0.026897                | 2.371687  | 4.123272  |
| 21               | 6                | 0              | -0.105468               | 1.353879  | 5.059251  |
| 22               | 6                | 0              | -1.027089               | 0.334001  | 4.845573  |
| 23               | 6                | 0              | -1.834045               | 0.286216  | 3.699703  |
| 24               | 7                | 0              | 3.795889                | -1.337230 | -0.609153 |
| 25               | 6                | 0              | 4.946103                | -1.574296 | -0.633475 |
| 26               | 7                | 0              | 6.165308                | -1.977915 | -0.487977 |
| 27               | 6                | 0              | 6.666101                | -2.312120 | 0.867240  |
| 28               | 6                | 0              | 7.107727                | -2.040415 | -1.621525 |
| 29               | 6                | 0              | -2.093008               | 2.967913  | -2.849536 |
| 30               | 6                | 0              | -2.914973               | 4.063263  | -2.142831 |
| 31               | 6                | 0              | -0.661173               | 2.890838  | -2.290775 |
| 32               | 6                | 0              | -4.626525               | -1.192244 | -0.981537 |
| 33               | 6                | 0              | -6.159482               | -1.014516 | -0.990979 |
| 34               | 6                | 0              | -4.247360               | -2.682478 | -1.029512 |
| 35               | 6                | 0              | -2.823094               | -0.882960 | 3.615235  |
| 36               | 6                | 0              | -4.304833               | -0.477637 | 3.495487  |
| 37               | 6                | 0              | -2.436391               | -1.945704 | 2.570069  |
| 38               | 6                | 0              | -0.591868               | 3.548999  | 1.980287  |
| 39               | 6                | 0              | 0.875808                | 3.792697  | 1.583527  |
| 40               | 6                | 0              | -1.222319               | 4.831321  | 2.562116  |
| 41               | 6                | 0              | 4.181980                | 2.962704  | -1.071872 |
| 42               | 6                | 0              | 5.436456                | 3.535606  | -0.791725 |
| 43               | 6                | 0              | 5.673265                | 4.892172  | -1.003356 |
| 44               | 6                | 0              | 4.660241                | 5.706788  | -1.511418 |
| 45               | 6                | 0              | 3.412338                | 5.150537  | -1.809510 |
| 46               | 6                | 0              | 3.174968                | 3.795905  | -1.596341 |
| 47               | 6                | 0              | 2.695823                | -4.844984 | 0.985630  |
| 48               | 16               | 0              | 2.092825                | -3.205592 | 1.434870  |
| 49               | 8                | 0              | 1.008588                | -3.367185 | 2.408092  |
| 50               | 8                | 0              | 3.246152                | -2.373069 | 1.797928  |

|     |   |   |            |            |            |
|-----|---|---|------------|------------|------------|
| 51  | 1 | 0 | 1. 870415  | 1. 401952  | -0. 858913 |
| 52  | 1 | 0 | 4. 909546  | 0. 982957  | -0. 644201 |
| 53  | 1 | 0 | -4. 103845 | 2. 533598  | 2. 313493  |
| 54  | 1 | 0 | -4. 955113 | 2. 343915  | -0. 322338 |
| 55  | 1 | 0 | -2. 635130 | 1. 704965  | -5. 097836 |
| 56  | 1 | 0 | -3. 809700 | -0. 423347 | -5. 518705 |
| 57  | 1 | 0 | -4. 710226 | -1. 733775 | -3. 626195 |
| 58  | 1 | 0 | 0. 732752  | 3. 176168  | 4. 302277  |
| 59  | 1 | 0 | 0. 498761  | 1. 359359  | 5. 961508  |
| 60  | 1 | 0 | -1. 134373 | -0. 450761 | 5. 588477  |
| 61  | 1 | 0 | 5. 828851  | -2. 310317 | 1. 565778  |
| 62  | 1 | 0 | 7. 119831  | -3. 306290 | 0. 836424  |
| 63  | 1 | 0 | 7. 415730  | -1. 576742 | 1. 172782  |
| 64  | 1 | 0 | 6. 592628  | -1. 765745 | -2. 541872 |
| 65  | 1 | 0 | 7. 936596  | -1. 348553 | -1. 447589 |
| 66  | 1 | 0 | 7. 496527  | -3. 058403 | -1. 711415 |
| 67  | 1 | 0 | -1. 991179 | 3. 301882  | -3. 888799 |
| 68  | 1 | 0 | -2. 457222 | 5. 040503  | -2. 328643 |
| 69  | 1 | 0 | -2. 955873 | 3. 923825  | -1. 059995 |
| 70  | 1 | 0 | -3. 940403 | 4. 100559  | -2. 524274 |
| 71  | 1 | 0 | -0. 647137 | 2. 603130  | -1. 236894 |
| 72  | 1 | 0 | -0. 062261 | 2. 162067  | -2. 846130 |
| 73  | 1 | 0 | -0. 179369 | 3. 870954  | -2. 380625 |
| 74  | 1 | 0 | -4. 259749 | -0. 803319 | -0. 028566 |
| 75  | 1 | 0 | -6. 445549 | 0. 038646  | -0. 905381 |
| 76  | 1 | 0 | -6. 611638 | -1. 556726 | -0. 154071 |
| 77  | 1 | 0 | -6. 596938 | -1. 402055 | -1. 917039 |
| 78  | 1 | 0 | -3. 163291 | -2. 819765 | -1. 017734 |
| 79  | 1 | 0 | -4. 667450 | -3. 201314 | -0. 161538 |
| 80  | 1 | 0 | -4. 640635 | -3. 175361 | -1. 924616 |
| 81  | 1 | 0 | -2. 733926 | -1. 376770 | 4. 589939  |
| 82  | 1 | 0 | -4. 569520 | 0. 294410  | 4. 225554  |
| 83  | 1 | 0 | -4. 937190 | -1. 349510 | 3. 692900  |
| 84  | 1 | 0 | -4. 561956 | -0. 109682 | 2. 499333  |
| 85  | 1 | 0 | -3. 094922 | -2. 816123 | 2. 670580  |
| 86  | 1 | 0 | -2. 533245 | -1. 570452 | 1. 548319  |
| 87  | 1 | 0 | -1. 404434 | -2. 279782 | 2. 708336  |
| 88  | 1 | 0 | -1. 134759 | 3. 306951  | 1. 062798  |
| 89  | 1 | 0 | 1. 341425  | 2. 881926  | 1. 196327  |
| 90  | 1 | 0 | 0. 936019  | 4. 564075  | 0. 809297  |
| 91  | 1 | 0 | 1. 475502  | 4. 138453  | 2. 431446  |
| 92  | 1 | 0 | -2. 282131 | 4. 689869  | 2. 796788  |
| 93  | 1 | 0 | -1. 141450 | 5. 656563  | 1. 846842  |
| 94  | 1 | 0 | -0. 716709 | 5. 136444  | 3. 484220  |
| 95  | 1 | 0 | 6. 229602  | 2. 907686  | -0. 392579 |
| 96  | 1 | 0 | 6. 647873  | 5. 312658  | -0. 774127 |
| 97  | 1 | 0 | 4. 842352  | 6. 763224  | -1. 683031 |
| 98  | 1 | 0 | 2. 625410  | 5. 775824  | -2. 221457 |
| 99  | 1 | 0 | 2. 209700  | 3. 375803  | -1. 859055 |
| 100 | 1 | 0 | 3. 480859  | -4. 738542 | 0. 237438  |
| 101 | 1 | 0 | 3. 089755  | -5. 272549 | 1. 909620  |
| 102 | 1 | 0 | 1. 874615  | -5. 451415 | 0. 607272  |
| 103 | 6 | 0 | 0. 514666  | -3. 418360 | -0. 782051 |
| 104 | 6 | 0 | 0. 564972  | -3. 366011 | -2. 183738 |
| 105 | 6 | 0 | -0. 425878 | -4. 246822 | -0. 153289 |
| 106 | 6 | 0 | -0. 308410 | -4. 136937 | -2. 947856 |
| 107 | 1 | 0 | 1. 297167  | -2. 725383 | -2. 664086 |
| 108 | 6 | 0 | -1. 273998 | -5. 039188 | -0. 931025 |
| 109 | 1 | 0 | -0. 500073 | -4. 267902 | 0. 926745  |

|     |   |   |           |           |           |
|-----|---|---|-----------|-----------|-----------|
| 110 | 6 | 0 | -1.222665 | -4.988885 | -2.324469 |
| 111 | 1 | 0 | -0.259566 | -4.084863 | -4.031294 |
| 112 | 1 | 0 | -1.990704 | -5.687891 | -0.436369 |
| 113 | 1 | 0 | -1.890086 | -5.604894 | -2.918896 |

Sum of electronic and zero-point Energies= -2782.305407  
Sum of electronic and thermal Energies= -2782.245438  
Sum of electronic and thermal Enthalpies= -2782.244494  
Sum of electronic and thermal Free Energies= -2782.408124

### B-tsa2

| Center Number | Atomic Number | Atomic Type | Coordinates (Angstroms) |           |           |
|---------------|---------------|-------------|-------------------------|-----------|-----------|
|               |               |             | X                       | Y         | Z         |
| 1             | 6             | 0           | -1.618502               | -0.010360 | -0.826852 |
| 2             | 6             | 0           | -2.375277               | -1.135841 | -0.586995 |
| 3             | 6             | 0           | -2.231190               | 1.044127  | -1.548033 |
| 4             | 7             | 0           | -1.810885               | -2.321955 | -0.035581 |
| 5             | 6             | 0           | -3.475263               | 1.644559  | -1.332254 |
| 6             | 79            | 0           | 0.383970                | 0.255155  | -0.362764 |
| 7             | 6             | 0           | 2.305555                | 0.778007  | 0.196635  |
| 8             | 7             | 0           | 3.268261                | 0.070256  | 0.854354  |
| 9             | 6             | 0           | 4.388488                | 0.862472  | 1.082270  |
| 10            | 6             | 0           | 4.115597                | 2.089852  | 0.577234  |
| 11            | 7             | 0           | 2.842792                | 2.022130  | 0.024236  |
| 12            | 6             | 0           | 3.261066                | -1.353498 | 1.148066  |
| 13            | 6             | 0           | 2.145178                | 3.177648  | -0.512654 |
| 14            | 6             | 0           | 1.391536                | 3.952865  | 0.395744  |
| 15            | 6             | 0           | 0.726788                | 5.081068  | -0.102055 |
| 16            | 6             | 0           | 0.811562                | 5.429306  | -1.444322 |
| 17            | 6             | 0           | 1.576645                | 4.655933  | -2.312595 |
| 18            | 6             | 0           | 2.269485                | 3.515675  | -1.880557 |
| 19            | 6             | 0           | 3.808525                | -2.207515 | 0.165410  |
| 20            | 6             | 0           | 3.883882                | -3.575323 | 0.456559  |
| 21            | 6             | 0           | 3.430234                | -4.075920 | 1.670887  |
| 22            | 6             | 0           | 2.900062                | -3.209032 | 2.621850  |
| 23            | 6             | 0           | 2.809281                | -1.826347 | 2.402101  |
| 24            | 7             | 0           | -3.674869               | -1.265017 | -1.033197 |
| 25            | 6             | 0           | -4.449711               | -0.381125 | -1.458187 |
| 26            | 7             | 0           | -5.748499               | -0.204244 | -1.449032 |
| 27            | 6             | 0           | -6.576303               | -0.736677 | -0.350256 |
| 28            | 6             | 0           | -6.432387               | 0.617277  | -2.448892 |
| 29            | 1             | 0           | -3.789608               | 2.295797  | -2.147274 |
| 30            | 6             | 0           | 3.080362                | 2.768551  | -2.947021 |
| 31            | 6             | 0           | 4.584253                | 2.618166  | -2.647972 |
| 32            | 6             | 0           | 2.450741                | 1.426933  | -3.368213 |
| 33            | 6             | 0           | -4.147907               | 1.990874  | -0.059237 |
| 34            | 6             | 0           | -5.118118               | 3.012262  | -0.110121 |
| 35            | 6             | 0           | -5.784244               | 3.429803  | 1.040454  |
| 36            | 6             | 0           | -5.494161               | 2.830788  | 2.267974  |
| 37            | 6             | 0           | -4.532349               | 1.818575  | 2.333552  |
| 38            | 6             | 0           | -3.861335               | 1.400124  | 1.186496  |
| 39            | 6             | 0           | -3.585296               | -4.301157 | 0.834236  |
| 40            | 16            | 0           | -2.569094               | -2.918085 | 1.386493  |
| 41            | 8             | 0           | -3.446257               | -1.831708 | 1.841803  |
| 42            | 8             | 0           | -1.530460               | -3.452446 | 2.265813  |
| 43            | 6             | 0           | 2.232926                | -0.994558 | 3.554704  |
| 44            | 6             | 0           | 0.781904                | -0.540980 | 3.305249  |



|     |   |   |            |            |            |
|-----|---|---|------------|------------|------------|
| 45  | 6 | 0 | 3. 117163  | 0. 167275  | 4. 044818  |
| 46  | 6 | 0 | 4. 354373  | -1. 706342 | -1. 170107 |
| 47  | 6 | 0 | 5. 888357  | -1. 855124 | -1. 232333 |
| 48  | 6 | 0 | 3. 683694  | -2. 405997 | -2. 367471 |
| 49  | 6 | 0 | 1. 302538  | 3. 642335  | 1. 888289  |
| 50  | 6 | 0 | 2. 056206  | 4. 703959  | 2. 715641  |
| 51  | 6 | 0 | -0. 154914 | 3. 502525  | 2. 366659  |
| 52  | 1 | 0 | -1. 698696 | 1. 379025  | -2. 440036 |
| 53  | 1 | 0 | 5. 261241  | 0. 478313  | 1. 584059  |
| 54  | 1 | 0 | 4. 700183  | 2. 994735  | 0. 552821  |
| 55  | 1 | 0 | 0. 145159  | 5. 696809  | 0. 576493  |
| 56  | 1 | 0 | 0. 295879  | 6. 310920  | -1. 813594 |
| 57  | 1 | 0 | 1. 651953  | 4. 944716  | -3. 357017 |
| 58  | 1 | 0 | 4. 313971  | -4. 250356 | -0. 276532 |
| 59  | 1 | 0 | 3. 501719  | -5. 138145 | 1. 886017  |
| 60  | 1 | 0 | 2. 557020  | -3. 606539 | 3. 572344  |
| 61  | 1 | 0 | -7. 052327 | 0. 096217  | 0. 176429  |
| 62  | 1 | 0 | -7. 347916 | -1. 394760 | -0. 761782 |
| 63  | 1 | 0 | -5. 941446 | -1. 285764 | 0. 343437  |
| 64  | 1 | 0 | -5. 733145 | 0. 894556  | -3. 236775 |
| 65  | 1 | 0 | -7. 251790 | 0. 039149  | -2. 886657 |
| 66  | 1 | 0 | -6. 842325 | 1. 518805  | -1. 983306 |
| 67  | 1 | 0 | 3. 022236  | 3. 417071  | -3. 829131 |
| 68  | 1 | 0 | 5. 023053  | 3. 565586  | -2. 318585 |
| 69  | 1 | 0 | 5. 106672  | 2. 311905  | -3. 560088 |
| 70  | 1 | 0 | 4. 789303  | 1. 861845  | -1. 886959 |
| 71  | 1 | 0 | 1. 405710  | 1. 558851  | -3. 666135 |
| 72  | 1 | 0 | 2. 994967  | 1. 013234  | -4. 224179 |
| 73  | 1 | 0 | 2. 476072  | 0. 688014  | -2. 563913 |
| 74  | 1 | 0 | -5. 330871 | 3. 499629  | -1. 058515 |
| 75  | 1 | 0 | -6. 519861 | 4. 226039  | 0. 979498  |
| 76  | 1 | 0 | -6. 009948 | 3. 152803  | 3. 167456  |
| 77  | 1 | 0 | -4. 301853 | 1. 345163  | 3. 282800  |
| 78  | 1 | 0 | -3. 131278 | 0. 605145  | 1. 269717  |
| 79  | 1 | 0 | -2. 938589 | -5. 049367 | 0. 375606  |
| 80  | 1 | 0 | -4. 067362 | -4. 708346 | 1. 724668  |
| 81  | 1 | 0 | -4. 321976 | -3. 927939 | 0. 122891  |
| 82  | 1 | 0 | 2. 186519  | -1. 698991 | 4. 393423  |
| 83  | 1 | 0 | 0. 379724  | -0. 073851 | 4. 211284  |
| 84  | 1 | 0 | 0. 717839  | 0. 189761  | 2. 493838  |
| 85  | 1 | 0 | 0. 141546  | -1. 389542 | 3. 048725  |
| 86  | 1 | 0 | 4. 154377  | -0. 150797 | 4. 193544  |
| 87  | 1 | 0 | 2. 740912  | 0. 524532  | 5. 008913  |
| 88  | 1 | 0 | 3. 115117  | 1. 018755  | 3. 360444  |
| 89  | 1 | 0 | 4. 128761  | -0. 640752 | -1. 258654 |
| 90  | 1 | 0 | 6. 379269  | -1. 319587 | -0. 413463 |
| 91  | 1 | 0 | 6. 272277  | -1. 454994 | -2. 176425 |
| 92  | 1 | 0 | 6. 189764  | -2. 905798 | -1. 168627 |
| 93  | 1 | 0 | 2. 595322  | -2. 303683 | -2. 332613 |
| 94  | 1 | 0 | 4. 041613  | -1. 968672 | -3. 305329 |
| 95  | 1 | 0 | 3. 917721  | -3. 475072 | -2. 395436 |
| 96  | 1 | 0 | 1. 789372  | 2. 681619  | 2. 072478  |
| 97  | 1 | 0 | 3. 106193  | 4. 777954  | 2. 415060  |
| 98  | 1 | 0 | 2. 026035  | 4. 449482  | 3. 780051  |
| 99  | 1 | 0 | 1. 606602  | 5. 695213  | 2. 596347  |
| 100 | 1 | 0 | -0. 707512 | 4. 442618  | 2. 269949  |
| 101 | 1 | 0 | -0. 688956 | 2. 736582  | 1. 796279  |
| 102 | 1 | 0 | -0. 176128 | 3. 217274  | 3. 423457  |
| 103 | 6 | 0 | -1. 065560 | -3. 236811 | -0. 865166 |

|     |   |   |           |           |           |
|-----|---|---|-----------|-----------|-----------|
| 104 | 6 | 0 | -1.460481 | -3.454314 | -2.193584 |
| 105 | 6 | 0 | 0.037918  | -3.920211 | -0.340959 |
| 106 | 6 | 0 | -0.744988 | -4.343027 | -2.994846 |
| 107 | 1 | 0 | -2.325079 | -2.935630 | -2.593582 |
| 108 | 6 | 0 | 0.724878  | -4.831469 | -1.144985 |
| 109 | 1 | 0 | 0.346731  | -3.740397 | 0.681145  |
| 110 | 6 | 0 | 0.343918  | -5.042935 | -2.470845 |
| 111 | 1 | 0 | -1.052211 | -4.501165 | -4.024314 |
| 112 | 1 | 0 | 1.575168  | -5.362919 | -0.730304 |
| 113 | 1 | 0 | 0.890140  | -5.746223 | -3.091773 |

Sum of electronic and zero-point Energies= -2782.292569

Sum of electronic and thermal Energies= -2782.234080

Sum of electronic and thermal Enthalpies= -2782.233136

Sum of electronic and thermal Free Energies= -2782.391820

## B-tsb2

| Center<br>Number | Atomic<br>Number | Atomic<br>Type | Coordinates (Angstroms) |           |           |
|------------------|------------------|----------------|-------------------------|-----------|-----------|
|                  |                  |                | X                       | Y         | Z         |
| 1                | 6                | 0              | 2.594753                | -0.341035 | -0.126547 |
| 2                | 6                | 0              | 1.467289                | -1.228879 | -0.048871 |
| 3                | 6                | 0              | 2.450571                | 1.074722  | -0.144329 |
| 4                | 7                | 0              | 1.699819                | -2.558431 | 0.044383  |
| 5                | 6                | 0              | 3.576720                | 1.883843  | -0.139603 |
| 6                | 79               | 0              | -0.451444               | -0.378338 | 0.026337  |
| 7                | 6                | 0              | -2.296014               | 0.564896  | 0.126213  |
| 8                | 7                | 0              | -3.235222               | 0.613193  | -0.865016 |
| 9                | 6                | 0              | -4.330295               | 1.370373  | -0.467632 |
| 10               | 6                | 0              | -4.069512               | 1.814847  | 0.784829  |
| 11               | 7                | 0              | -2.826535               | 1.306026  | 1.144984  |
| 12               | 6                | 0              | -3.213632               | -0.142016 | -2.109172 |
| 13               | 6                | 0              | -2.178237               | 1.659660  | 2.397560  |
| 14               | 6                | 0              | -1.425871               | 2.855469  | 2.420142  |
| 15               | 6                | 0              | -0.817252               | 3.222938  | 3.626892  |
| 16               | 6                | 0              | -0.958189               | 2.444391  | 4.768848  |
| 17               | 6                | 0              | -1.734018               | 1.290767  | 4.726188  |
| 18               | 6                | 0              | -2.375417               | 0.867821  | 3.552624  |
| 19               | 6                | 0              | -2.674520               | 0.429493  | -3.284565 |
| 20               | 6                | 0              | -2.694206               | -0.367486 | -4.438288 |
| 21               | 6                | 0              | -3.236943               | -1.648245 | -4.441552 |
| 22               | 6                | 0              | -3.799779               | -2.162752 | -3.280525 |
| 23               | 6                | 0              | -3.806594               | -1.424585 | -2.090983 |
| 24               | 7                | 0              | 3.849045                | -0.810680 | -0.411394 |
| 25               | 6                | 0              | 4.768905                | -0.028941 | -0.787570 |
| 26               | 7                | 0              | 6.075516                | -0.021857 | -0.666237 |
| 27               | 6                | 0              | 6.778615                | -0.768098 | 0.390473  |
| 28               | 6                | 0              | 6.897213                | 0.831210  | -1.529060 |
| 29               | 1                | 0              | 4.387396                | 1.599884  | 0.527904  |
| 30               | 6                | 0              | -3.225944               | -0.403012 | 3.670792  |
| 31               | 6                | 0              | -4.699355               | -0.264694 | 3.244121  |
| 32               | 6                | 0              | -2.563509               | -1.634317 | 3.026725  |
| 33               | 6                | 0              | -4.511213               | -1.997830 | -0.862523 |
| 34               | 6                | 0              | -6.040544               | -1.826391 | -0.989325 |
| 35               | 6                | 0              | -4.159480               | -3.473314 | -0.597983 |
| 36               | 6                | 0              | -2.104288               | 1.844011  | -3.448180 |
| 37               | 6                | 0              | -3.093244               | 2.979516  | -3.119775 |
| 38               | 6                | 0              | -0.747163               | 2.064288  | -2.756421 |

|    |    |   |           |           |           |
|----|----|---|-----------|-----------|-----------|
| 39 | 6  | 0 | -1.308799 | 3.785990  | 1.214956  |
| 40 | 6  | 0 | -2.282967 | 4.976115  | 1.351154  |
| 41 | 6  | 0 | 0.126071  | 4.295295  | 0.991811  |
| 42 | 6  | 0 | 3.631520  | 3.269952  | -0.612334 |
| 43 | 6  | 0 | 2.807089  | 3.727400  | -1.658418 |
| 44 | 6  | 0 | 2.878494  | 5.048641  | -2.092953 |
| 45 | 6  | 0 | 3.781862  | 5.937351  | -1.502650 |
| 46 | 6  | 0 | 4.617835  | 5.493721  | -0.475136 |
| 47 | 6  | 0 | 4.546035  | 4.173115  | -0.038165 |
| 48 | 6  | 0 | -0.163493 | -4.113085 | 1.455873  |
| 49 | 16 | 0 | 0.360714  | -3.748015 | -0.224607 |
| 50 | 8  | 0 | 1.004597  | -4.928291 | -0.785944 |
| 51 | 8  | 0 | -0.706270 | -3.060091 | -0.945703 |
| 52 | 1  | 0 | 1.460374  | 1.486981  | -0.308901 |
| 53 | 1  | 0 | -5.180735 | 1.520465  | -1.111725 |
| 54 | 1  | 0 | -4.647657 | 2.428426  | 1.455546  |
| 55 | 1  | 0 | -0.234831 | 4.136857  | 3.671599  |
| 56 | 1  | 0 | -0.481844 | 2.745114  | 5.697216  |
| 57 | 1  | 0 | -1.862729 | 0.701924  | 5.629810  |
| 58 | 1  | 0 | -2.282201 | 0.038414  | -5.357602 |
| 59 | 1  | 0 | -3.236321 | -2.236063 | -5.354475 |
| 60 | 1  | 0 | -4.244583 | -3.151776 | -3.295086 |
| 61 | 1  | 0 | 7.613108  | -1.319469 | -0.053158 |
| 62 | 1  | 0 | 7.175464  | -0.079215 | 1.145080  |
| 63 | 1  | 0 | 6.088285  | -1.471142 | 0.855042  |
| 64 | 1  | 0 | 7.636551  | 0.221674  | -2.058528 |
| 65 | 1  | 0 | 6.254542  | 1.333698  | -2.250793 |
| 66 | 1  | 0 | 7.424457  | 1.582058  | -0.930384 |
| 67 | 1  | 0 | -3.253103 | -0.606823 | 4.747532  |
| 68 | 1  | 0 | -5.157260 | 0.630214  | 3.677448  |
| 69 | 1  | 0 | -5.263541 | -1.130821 | 3.605037  |
| 70 | 1  | 0 | -4.825004 | -0.223603 | 2.160079  |
| 71 | 1  | 0 | -1.552726 | -1.774061 | 3.424940  |
| 72 | 1  | 0 | -3.146245 | -2.534667 | 3.251038  |
| 73 | 1  | 0 | -2.491641 | -1.536553 | 1.940210  |
| 74 | 1  | 0 | -4.187086 | -1.431393 | 0.015131  |
| 75 | 1  | 0 | -6.326731 | -0.777772 | -1.115906 |
| 76 | 1  | 0 | -6.544302 | -2.207761 | -0.094900 |
| 77 | 1  | 0 | -6.423720 | -2.380471 | -1.852580 |
| 78 | 1  | 0 | -3.077951 | -3.623541 | -0.571159 |
| 79 | 1  | 0 | -4.586381 | -3.788083 | 0.360305  |
| 80 | 1  | 0 | -4.574384 | -4.135530 | -1.364534 |
| 81 | 1  | 0 | -1.907273 | 1.928585  | -4.523194 |
| 82 | 1  | 0 | -4.063747 | 2.813456  | -3.598128 |
| 83 | 1  | 0 | -2.697866 | 3.929278  | -3.494920 |
| 84 | 1  | 0 | -3.255275 | 3.096914  | -2.045430 |
| 85 | 1  | 0 | -0.031039 | 1.285240  | -3.035861 |
| 86 | 1  | 0 | -0.334218 | 3.033953  | -3.056687 |
| 87 | 1  | 0 | -0.837831 | 2.062151  | -1.667488 |
| 88 | 1  | 0 | -1.594613 | 3.226617  | 0.319803  |
| 89 | 1  | 0 | -3.321679 | 4.645835  | 1.446472  |
| 90 | 1  | 0 | -2.215726 | 5.627016  | 0.473273  |
| 91 | 1  | 0 | -2.043134 | 5.577057  | 2.234637  |
| 92 | 1  | 0 | 0.848390  | 3.475312  | 0.967481  |
| 93 | 1  | 0 | 0.191260  | 4.832894  | 0.041318  |
| 94 | 1  | 0 | 0.439202  | 4.992016  | 1.775888  |
| 95 | 1  | 0 | 2.128179  | 3.033532  | -2.145107 |
| 96 | 1  | 0 | 2.240425  | 5.384117  | -2.905431 |
| 97 | 1  | 0 | 3.841202  | 6.964719  | -1.848687 |

|     |   |   |           |           |           |
|-----|---|---|-----------|-----------|-----------|
| 98  | 1 | 0 | 5.325223  | 6.177336  | -0.015284 |
| 99  | 1 | 0 | 5.194750  | 3.835355  | 0.766652  |
| 100 | 1 | 0 | -0.573263 | -3.207897 | 1.901984  |
| 101 | 1 | 0 | -0.929013 | -4.887251 | 1.372753  |
| 102 | 1 | 0 | 0.697749  | -4.488646 | 2.008806  |
| 103 | 6 | 0 | 2.927843  | -3.210200 | 0.471403  |
| 104 | 6 | 0 | 3.696762  | -3.960711 | -0.421256 |
| 105 | 6 | 0 | 3.279187  | -3.125664 | 1.822936  |
| 106 | 6 | 0 | 4.835504  | -4.614249 | 0.044686  |
| 107 | 1 | 0 | 3.403627  | -4.025997 | -1.461525 |
| 108 | 6 | 0 | 4.427403  | -3.776116 | 2.277786  |
| 109 | 1 | 0 | 2.668279  | -2.540825 | 2.504397  |
| 110 | 6 | 0 | 5.205181  | -4.522863 | 1.389931  |
| 111 | 1 | 0 | 5.434117  | -5.200460 | -0.645477 |
| 112 | 1 | 0 | 4.703767  | -3.709044 | 3.325640  |
| 113 | 1 | 0 | 6.090727  | -5.040078 | 1.746407  |

Sum of electronic and zero-point Energies= -2782.297401

Sum of electronic and thermal Energies= -2782.238806

Sum of electronic and thermal Enthalpies= -2782.237862

Sum of electronic and thermal Free Energies= -2782.396832

### B-a2

| Center<br>Number | Atomic<br>Number | Atomic<br>Type | Coordinates (Angstroms) |           |           |
|------------------|------------------|----------------|-------------------------|-----------|-----------|
|                  |                  |                | X                       | Y         | Z         |
| 1                | 6                | 0              | -1.602539               | 0.293644  | -0.270346 |
| 2                | 6                | 0              | -2.525645               | -0.844761 | -0.389545 |
| 3                | 6                | 0              | -2.229043               | 1.472906  | -0.498800 |
| 4                | 7                | 0              | -2.327166               | -1.988639 | 0.317485  |
| 5                | 6                | 0              | -3.684148               | 1.607101  | -0.905225 |
| 6                | 79               | 0              | 0.470554                | 0.240465  | -0.129663 |
| 7                | 6                | 0              | 2.525772                | 0.431498  | -0.221237 |
| 8                | 7                | 0              | 3.499931                | -0.522174 | -0.307251 |
| 9                | 6                | 0              | 4.758842                | 0.063928  | -0.377977 |
| 10               | 6                | 0              | 4.572080                | 1.405480  | -0.323507 |
| 11               | 7                | 0              | 3.200774                | 1.619856  | -0.251562 |
| 12               | 6                | 0              | 3.277814                | -1.951918 | -0.407832 |
| 13               | 6                | 0              | 2.606929                | 2.943465  | -0.142116 |
| 14               | 6                | 0              | 2.384204                | 3.453242  | 1.155946  |
| 15               | 6                | 0              | 1.836307                | 4.737195  | 1.273431  |
| 16               | 6                | 0              | 1.531751                | 5.493499  | 0.149412  |
| 17               | 6                | 0              | 1.777621                | 4.973621  | -1.117473 |
| 18               | 6                | 0              | 2.319905                | 3.694069  | -1.308076 |
| 19               | 6                | 0              | 2.873652                | -2.465503 | -1.661525 |
| 20               | 6                | 0              | 2.647987                | -3.843804 | -1.763023 |
| 21               | 6                | 0              | 2.835193                | -4.685923 | -0.672731 |
| 22               | 6                | 0              | 3.269017                | -4.157271 | 0.537990  |
| 23               | 6                | 0              | 3.509428                | -2.784860 | 0.709721  |
| 24               | 7                | 0              | -3.586185               | -0.847593 | -1.218244 |
| 25               | 6                | 0              | -4.157595               | 0.309447  | -1.525084 |
| 26               | 7                | 0              | -5.208649               | 0.295334  | -2.352940 |
| 27               | 6                | 0              | -5.651054               | -0.981102 | -2.930482 |
| 28               | 6                | 0              | -5.915050               | 1.515556  | -2.755286 |
| 29               | 1                | 0              | -3.721629               | 2.386911  | -1.674857 |
| 30               | 6                | 0              | 2.498266                | 3.259699  | -2.769502 |
| 31               | 6                | 0              | 3.883904                | 2.723249  | -3.171424 |
| 32               | 6                | 0              | 1.371867                | 2.318347  | -3.239544 |

|    |    |   |           |           |           |
|----|----|---|-----------|-----------|-----------|
| 33 | 6  | 0 | -4.566766 | 2.076253  | 0.264551  |
| 34 | 6  | 0 | -4.708730 | 3.450187  | 0.499489  |
| 35 | 6  | 0 | -5.457155 | 3.909658  | 1.584245  |
| 36 | 6  | 0 | -6.075445 | 2.999964  | 2.443213  |
| 37 | 6  | 0 | -5.942585 | 1.629762  | 2.210670  |
| 38 | 6  | 0 | -5.191633 | 1.165796  | 1.129050  |
| 39 | 6  | 0 | -3.323607 | -3.927054 | -1.465759 |
| 40 | 16 | 0 | -3.542194 | -3.346847 | 0.221836  |
| 41 | 8  | 0 | -4.884633 | -2.804547 | 0.417120  |
| 42 | 8  | 0 | -3.003559 | -4.350777 | 1.128376  |
| 43 | 6  | 0 | 4.066346  | -2.380656 | 2.081570  |
| 44 | 6  | 0 | 3.592719  | -1.050379 | 2.686353  |
| 45 | 6  | 0 | 5.608101  | -2.475918 | 2.103425  |
| 46 | 6  | 0 | 2.738885  | -1.607670 | -2.917408 |
| 47 | 6  | 0 | 3.828157  | -1.973478 | -3.946964 |
| 48 | 6  | 0 | 1.333838  | -1.703949 | -3.540756 |
| 49 | 6  | 0 | 2.731243  | 2.688019  | 2.428817  |
| 50 | 6  | 0 | 3.845110  | 3.400802  | 3.221970  |
| 51 | 6  | 0 | 1.488095  | 2.447979  | 3.307169  |
| 52 | 1  | 0 | -1.692242 | 2.413178  | -0.407887 |
| 53 | 1  | 0 | 5.656866  | -0.523701 | -0.471964 |
| 54 | 1  | 0 | 5.275529  | 2.221338  | -0.348189 |
| 55 | 1  | 0 | 1.658700  | 5.148538  | 2.261973  |
| 56 | 1  | 0 | 1.116660  | 6.491288  | 0.256909  |
| 57 | 1  | 0 | 1.549764  | 5.575439  | -1.992645 |
| 58 | 1  | 0 | 2.339613  | -4.261931 | -2.716056 |
| 59 | 1  | 0 | 2.660328  | -5.753461 | -0.768983 |
| 60 | 1  | 0 | 3.438895  | -4.822952 | 1.379983  |
| 61 | 1  | 0 | -6.630201 | -0.838242 | -3.386319 |
| 62 | 1  | 0 | -4.950896 | -1.328581 | -3.697340 |
| 63 | 1  | 0 | -5.718585 | -1.731841 | -2.141593 |
| 64 | 1  | 0 | -5.945002 | 2.234807  | -1.937811 |
| 65 | 1  | 0 | -5.448217 | 1.974887  | -3.634935 |
| 66 | 1  | 0 | -6.943405 | 1.255157  | -3.007528 |
| 67 | 1  | 0 | 2.373219  | 4.188173  | -3.338974 |
| 68 | 1  | 0 | 4.688050  | 3.364635  | -2.796618 |
| 69 | 1  | 0 | 3.958895  | 2.707957  | -4.263637 |
| 70 | 1  | 0 | 4.065183  | 1.705507  | -2.819980 |
| 71 | 1  | 0 | 0.388977  | 2.769497  | -3.070527 |
| 72 | 1  | 0 | 1.473092  | 2.118057  | -4.312029 |
| 73 | 1  | 0 | 1.390920  | 1.362939  | -2.709112 |
| 74 | 1  | 0 | -4.231479 | 4.164969  | -0.166865 |
| 75 | 1  | 0 | -5.560058 | 4.977347  | 1.752832  |
| 76 | 1  | 0 | -6.662132 | 3.356117  | 3.284258  |
| 77 | 1  | 0 | -6.429211 | 0.915617  | 2.868134  |
| 78 | 1  | 0 | -5.113423 | 0.095201  | 0.959049  |
| 79 | 1  | 0 | -2.302601 | -4.295995 | -1.563160 |
| 80 | 1  | 0 | -4.038300 | -4.743651 | -1.590280 |
| 81 | 1  | 0 | -3.531270 | -3.106067 | -2.147717 |
| 82 | 1  | 0 | 3.706346  | -3.164915 | 2.758873  |
| 83 | 1  | 0 | 3.840105  | -1.037472 | 3.753115  |
| 84 | 1  | 0 | 4.094929  | -0.192962 | 2.233582  |
| 85 | 1  | 0 | 2.512451  | -0.917702 | 2.588716  |
| 86 | 1  | 0 | 5.955521  | -3.446502 | 1.737945  |
| 87 | 1  | 0 | 5.978598  | -2.345014 | 3.125409  |
| 88 | 1  | 0 | 6.068152  | -1.697688 | 1.486388  |
| 89 | 1  | 0 | 2.894332  | -0.562566 | -2.641663 |
| 90 | 1  | 0 | 4.831664  | -1.870467 | -3.522297 |
| 91 | 1  | 0 | 3.760952  | -1.317063 | -4.820700 |

|     |   |   |           |           |           |
|-----|---|---|-----------|-----------|-----------|
| 92  | 1 | 0 | 3.720065  | -3.005466 | -4.296361 |
| 93  | 1 | 0 | 0.565576  | -1.399974 | -2.822420 |
| 94  | 1 | 0 | 1.263676  | -1.047409 | -4.414216 |
| 95  | 1 | 0 | 1.108297  | -2.721673 | -3.876407 |
| 96  | 1 | 0 | 3.112990  | 1.706399  | 2.146025  |
| 97  | 1 | 0 | 4.744443  | 3.541589  | 2.613784  |
| 98  | 1 | 0 | 4.120720  | 2.811125  | 4.102346  |
| 99  | 1 | 0 | 3.523287  | 4.387259  | 3.571306  |
| 100 | 1 | 0 | 1.054844  | 3.388762  | 3.662569  |
| 101 | 1 | 0 | 0.714710  | 1.904357  | 2.755502  |
| 102 | 1 | 0 | 1.759267  | 1.856764  | 4.188138  |
| 103 | 6 | 0 | -1.501914 | -2.041094 | 1.500018  |
| 104 | 6 | 0 | -1.880317 | -1.288525 | 2.617263  |
| 105 | 6 | 0 | -0.415294 | -2.915612 | 1.559921  |
| 106 | 6 | 0 | -1.150246 | -1.400303 | 3.799051  |
| 107 | 1 | 0 | -2.742203 | -0.631701 | 2.559095  |
| 108 | 6 | 0 | 0.299057  | -3.031049 | 2.751011  |
| 109 | 1 | 0 | -0.140121 | -3.503202 | 0.691495  |
| 110 | 6 | 0 | -0.065199 | -2.276752 | 3.868956  |
| 111 | 1 | 0 | -1.441908 | -0.819073 | 4.668051  |
| 112 | 1 | 0 | 1.135353  | -3.719550 | 2.804684  |
| 113 | 1 | 0 | 0.489099  | -2.379790 | 4.796824  |

Sum of electronic and zero-point Energies= -2782.362471

Sum of electronic and thermal Energies= -2782.304285

Sum of electronic and thermal Enthalpies= -2782.303341

Sum of electronic and thermal Free Energies= -2782.462557

## B-b2

| Center<br>Number | Atomic<br>Number | Atomic<br>Type | Coordinates (Angstroms) |           |           |
|------------------|------------------|----------------|-------------------------|-----------|-----------|
|                  |                  |                | X                       | Y         | Z         |
| 1                | 6                | 0              | -2.478804               | -0.560606 | -0.052349 |
| 2                | 6                | 0              | -1.261468               | -1.369819 | -0.121236 |
| 3                | 6                | 0              | -2.538029               | 0.728654  | -0.498438 |
| 4                | 7                | 0              | -1.399006               | -2.693997 | -0.172361 |
| 5                | 6                | 0              | -3.966574               | 1.191871  | -0.352536 |
| 6                | 79               | 0              | 0.542890                | -0.329758 | -0.083036 |
| 7                | 6                | 0              | 2.261817                | 0.821892  | -0.073398 |
| 8                | 7                | 0              | 3.386174                | 0.668319  | 0.683348  |
| 9                | 6                | 0              | 4.312775                | 1.661529  | 0.388448  |
| 10               | 6                | 0              | 3.754527                | 2.457991  | -0.555410 |
| 11               | 7                | 0              | 2.501970                | 1.926777  | -0.839132 |
| 12               | 6                | 0              | 3.686622                | -0.439139 | 1.578352  |
| 13               | 6                | 0              | 1.529122                | 2.584369  | -1.693079 |
| 14               | 6                | 0              | 0.714937                | 3.569898  | -1.091608 |
| 15               | 6                | 0              | -0.245740               | 4.201192  | -1.892915 |
| 16               | 6                | 0              | -0.380540               | 3.878978  | -3.238222 |
| 17               | 6                | 0              | 0.463382                | 2.932190  | -3.811826 |
| 18               | 6                | 0              | 1.445968                | 2.263022  | -3.067452 |
| 19               | 6                | 0              | 3.344113                | -0.366547 | 2.948028  |
| 20               | 6                | 0              | 3.694649                | -1.468016 | 3.742090  |
| 21               | 6                | 0              | 4.364557                | -2.570840 | 3.222763  |
| 22               | 6                | 0              | 4.714779                | -2.595737 | 1.878963  |
| 23               | 6                | 0              | 4.385962                | -1.534854 | 1.026958  |
| 24               | 7                | 0              | -3.709600               | -1.042882 | 0.429778  |
| 25               | 6                | 0              | -4.576531               | -0.069738 | 0.280242  |
| 26               | 7                | 0              | -5.865876               | -0.177360 | 0.669786  |

|    |    |   |           |           |           |
|----|----|---|-----------|-----------|-----------|
| 27 | 6  | 0 | -6.331965 | -1.450121 | 1.215489  |
| 28 | 6  | 0 | -6.900820 | 0.763381  | 0.260413  |
| 29 | 1  | 0 | -4.403582 | 1.346420  | -1.350222 |
| 30 | 6  | 0 | 2.335119  | 1.280430  | -3.840077 |
| 31 | 6  | 0 | 3.844509  | 1.582954  | -3.775618 |
| 32 | 6  | 0 | 2.045167  | -0.201328 | -3.533846 |
| 33 | 6  | 0 | 4.834998  | -1.589392 | -0.431872 |
| 34 | 6  | 0 | 6.353998  | -1.345965 | -0.550054 |
| 35 | 6  | 0 | 4.442756  | -2.912661 | -1.115380 |
| 36 | 6  | 0 | 2.644832  | 0.792273  | 3.669828  |
| 37 | 6  | 0 | 3.335036  | 2.162773  | 3.535848  |
| 38 | 6  | 0 | 1.135837  | 0.884338  | 3.373671  |
| 39 | 6  | 0 | 0.883705  | 4.018260  | 0.358967  |
| 40 | 6  | 0 | 1.510789  | 5.427380  | 0.416590  |
| 41 | 6  | 0 | -0.431849 | 3.972203  | 1.155335  |
| 42 | 6  | 0 | -4.106678 | 2.486001  | 0.443245  |
| 43 | 6  | 0 | -3.936359 | 2.491940  | 1.834914  |
| 44 | 6  | 0 | -4.046673 | 3.682224  | 2.553822  |
| 45 | 6  | 0 | -4.323646 | 4.881339  | 1.892419  |
| 46 | 6  | 0 | -4.489591 | 4.884014  | 0.506473  |
| 47 | 6  | 0 | -4.380637 | 3.692273  | -0.213677 |
| 48 | 6  | 0 | 0.475122  | -3.828702 | -1.919590 |
| 49 | 16 | 0 | 0.085044  | -3.778028 | -0.163110 |
| 50 | 8  | 0 | -0.403841 | -5.081412 | 0.262608  |
| 51 | 8  | 0 | 1.139381  | -3.083446 | 0.568072  |
| 52 | 1  | 0 | -1.733013 | 1.329603  | -0.897878 |
| 53 | 1  | 0 | 5.269198  | 1.708724  | 0.882509  |
| 54 | 1  | 0 | 4.123804  | 3.341894  | -1.048868 |
| 55 | 1  | 0 | -0.884824 | 4.961396  | -1.455599 |
| 56 | 1  | 0 | -1.125776 | 4.381066  | -3.848202 |
| 57 | 1  | 0 | 0.371821  | 2.709611  | -4.871018 |
| 58 | 1  | 0 | 3.441963  | -1.447879 | 4.798163  |
| 59 | 1  | 0 | 4.624315  | -3.402851 | 3.870195  |
| 60 | 1  | 0 | 5.254152  | -3.449504 | 1.482366  |
| 61 | 1  | 0 | -5.516237 | -1.933715 | 1.750550  |
| 62 | 1  | 0 | -7.164251 | -1.258985 | 1.897772  |
| 63 | 1  | 0 | -6.671504 | -2.126346 | 0.420069  |
| 64 | 1  | 0 | -7.594173 | 0.926529  | 1.090828  |
| 65 | 1  | 0 | -6.469549 | 1.725649  | -0.008418 |
| 66 | 1  | 0 | -7.474157 | 0.375592  | -0.593116 |
| 67 | 1  | 0 | 2.049761  | 1.429506  | -4.888024 |
| 68 | 1  | 0 | 4.047656  | 2.640341  | -3.972843 |
| 69 | 1  | 0 | 4.366758  | 0.998063  | -4.539660 |
| 70 | 1  | 0 | 4.283937  | 1.322835  | -2.809771 |
| 71 | 1  | 0 | 0.978387  | -0.421559 | -3.646125 |
| 72 | 1  | 0 | 2.600499  | -0.837813 | -4.231713 |
| 73 | 1  | 0 | 2.341018  | -0.474464 | -2.517841 |
| 74 | 1  | 0 | 4.331272  | -0.787835 | -0.979341 |
| 75 | 1  | 0 | 6.644641  | -0.380671 | -0.123828 |
| 76 | 1  | 0 | 6.664339  | -1.358508 | -1.600139 |
| 77 | 1  | 0 | 6.918309  | -2.122976 | -0.024116 |
| 78 | 1  | 0 | 3.378218  | -3.120068 | -0.980068 |
| 79 | 1  | 0 | 4.661827  | -2.860813 | -2.187122 |
| 80 | 1  | 0 | 5.002582  | -3.761763 | -0.710927 |
| 81 | 1  | 0 | 2.723958  | 0.529567  | 4.731190  |
| 82 | 1  | 0 | 4.409121  | 2.090197  | 3.735113  |
| 83 | 1  | 0 | 2.909868  | 2.857473  | 4.267622  |
| 84 | 1  | 0 | 3.200426  | 2.609522  | 2.547891  |
| 85 | 1  | 0 | 0.644605  | -0.080847 | 3.530349  |

|     |   |   |           |           |           |
|-----|---|---|-----------|-----------|-----------|
| 86  | 1 | 0 | 0.669850  | 1.615716  | 4.043367  |
| 87  | 1 | 0 | 0.936258  | 1.197606  | 2.345596  |
| 88  | 1 | 0 | 1.577039  | 3.334155  | 0.854157  |
| 89  | 1 | 0 | 2.471843  | 5.464746  | -0.106132 |
| 90  | 1 | 0 | 1.679009  | 5.726713  | 1.456115  |
| 91  | 1 | 0 | 0.854053  | 6.172529  | -0.044268 |
| 92  | 1 | 0 | -0.870509 | 2.970779  | 1.150336  |
| 93  | 1 | 0 | -0.245213 | 4.252939  | 2.196849  |
| 94  | 1 | 0 | -1.179832 | 4.666469  | 0.760812  |
| 95  | 1 | 0 | -3.727835 | 1.562580  | 2.357843  |
| 96  | 1 | 0 | -3.920939 | 3.672234  | 3.632420  |
| 97  | 1 | 0 | -4.416039 | 5.805550  | 2.454605  |
| 98  | 1 | 0 | -4.713515 | 5.810071  | -0.014808 |
| 99  | 1 | 0 | -4.517388 | 3.699530  | -1.292429 |
| 100 | 1 | 0 | 0.745543  | -2.824985 | -2.248248 |
| 101 | 1 | 0 | 1.318807  | -4.513896 | -2.023745 |
| 102 | 1 | 0 | -0.396087 | -4.214772 | -2.449400 |
| 103 | 6 | 0 | -2.617777 | -3.438580 | -0.435932 |
| 104 | 6 | 0 | -3.166647 | -3.379877 | -1.719417 |
| 105 | 6 | 0 | -3.181139 | -4.244992 | 0.554367  |
| 106 | 6 | 0 | -4.313482 | -4.120355 | -2.006488 |
| 107 | 1 | 0 | -2.711751 | -2.747678 | -2.476386 |
| 108 | 6 | 0 | -4.324220 | -4.982006 | 0.255964  |
| 109 | 1 | 0 | -2.731526 | -4.286286 | 1.539025  |
| 110 | 6 | 0 | -4.892275 | -4.920751 | -1.020235 |
| 111 | 1 | 0 | -4.748765 | -4.074651 | -2.999908 |
| 112 | 1 | 0 | -4.769526 | -5.610860 | 1.020385  |
| 113 | 1 | 0 | -5.779601 | -5.503763 | -1.246959 |

### B-tsa3

| Center Number | Atomic Number | Atomic Type | Coordinates (Angstroms) |           |           |
|---------------|---------------|-------------|-------------------------|-----------|-----------|
|               |               |             | X                       | Y         | Z         |
| 1             | 6             | 0           | -0.134235               | -1.015307 | 0.715141  |
| 2             | 6             | 0           | -0.355060               | -2.367652 | 0.292398  |
| 3             | 6             | 0           | -1.239219               | -0.489047 | 1.358627  |
| 4             | 7             | 0           | 0.761298                | -3.143900 | -0.135933 |
| 5             | 6             | 0           | -2.555107               | -1.109162 | 1.424781  |
| 6             | 79            | 0           | 1.509477                | 0.172270  | 0.308589  |
| 7             | 6             | 0           | 2.967546                | 1.567620  | -0.181018 |
| 8             | 7             | 0           | 4.294859                | 1.435516  | -0.487435 |
| 9             | 6             | 0           | 4.858998                | 2.670634  | -0.796525 |
| 10            | 6             | 0           | 3.880670                | 3.596218  | -0.656678 |
| 11            | 7             | 0           | 2.727171                | 2.910714  | -0.296596 |
| 12            | 6             | 0           | 5.046480                | 0.202563  | -0.632353 |
| 13            | 6             | 0           | 1.482898                | 3.576700  | 0.048472  |
| 14            | 6             | 0           | 1.279884                | 3.897014  | 1.407957  |
| 15            | 6             | 0           | 0.084796                | 4.536902  | 1.759646  |
| 16            | 6             | 0           | -0.870668               | 4.846806  | 0.801513  |
| 17            | 6             | 0           | -0.633170               | 4.542397  | -0.535018 |
| 18            | 6             | 0           | 0.545270                | 3.911416  | -0.957183 |
| 19            | 6             | 0           | 4.990506                | -0.449246 | -1.883331 |
| 20            | 6             | 0           | 5.774299                | -1.596708 | -2.063497 |
| 21            | 6             | 0           | 6.604164                | -2.063879 | -1.052515 |
| 22            | 6             | 0           | 6.647962                | -1.395142 | 0.167319  |
| 23            | 6             | 0           | 5.872072                | -0.255068 | 0.421326  |
| 24            | 7             | 0           | -1.525056               | -2.983312 | 0.255861  |



|    |    |   |           |           |           |
|----|----|---|-----------|-----------|-----------|
| 25 | 6  | 0 | -2.631496 | -2.397358 | 0.739273  |
| 26 | 7  | 0 | -3.791674 | -3.073596 | 0.545225  |
| 27 | 6  | 0 | -3.798917 | -4.368826 | -0.135129 |
| 28 | 6  | 0 | -5.113216 | -2.507798 | 0.779993  |
| 29 | 1  | 0 | -3.138770 | -0.261177 | 0.344311  |
| 30 | 6  | 0 | 0.681226  | 3.669610  | -2.465986 |
| 31 | 6  | 0 | 1.847183  | 4.429427  | -3.130456 |
| 32 | 6  | 0 | 0.664931  | 2.187354  | -2.876588 |
| 33 | 6  | 0 | -3.293446 | -0.913886 | 2.736461  |
| 34 | 6  | 0 | -3.579060 | 0.364077  | 3.242413  |
| 35 | 6  | 0 | -4.175687 | 0.523138  | 4.494247  |
| 36 | 6  | 0 | -4.501660 | -0.586785 | 5.273599  |
| 37 | 6  | 0 | -4.211274 | -1.862903 | 4.789749  |
| 38 | 6  | 0 | -3.609429 | -2.023293 | 3.541772  |
| 39 | 6  | 0 | -0.346187 | -3.658517 | -2.595746 |
| 40 | 16 | 0 | 0.502167  | -4.485384 | -1.243235 |
| 41 | 8  | 0 | -0.349461 | -5.543276 | -0.689194 |
| 42 | 8  | 0 | 1.849942  | -4.839263 | -1.699231 |
| 43 | 6  | 0 | 5.987910  | 0.346921  | 1.827020  |
| 44 | 6  | 0 | 4.707551  | 0.168599  | 2.664443  |
| 45 | 6  | 0 | 6.512372  | 1.794626  | 1.888670  |
| 46 | 6  | 0 | 4.129616  | 0.039791  | -3.044365 |
| 47 | 6  | 0 | 4.981886  | 0.365146  | -4.286818 |
| 48 | 6  | 0 | 3.017918  | -0.974171 | -3.378818 |
| 49 | 6  | 0 | 2.303805  | 3.602397  | 2.501633  |
| 50 | 6  | 0 | 2.853027  | 4.906891  | 3.113707  |
| 51 | 6  | 0 | 1.727560  | 2.677122  | 3.590413  |
| 52 | 1  | 0 | -1.167155 | 0.488971  | 1.826663  |
| 53 | 1  | 0 | 5.895079  | 2.766713  | -1.076079 |
| 54 | 1  | 0 | 3.892700  | 4.666739  | -0.776968 |
| 55 | 1  | 0 | -0.096765 | 4.787065  | 2.800352  |
| 56 | 1  | 0 | -1.803465 | 5.319950  | 1.091011  |
| 57 | 1  | 0 | -1.389285 | 4.781739  | -1.276466 |
| 58 | 1  | 0 | 5.738529  | -2.119942 | -3.013733 |
| 59 | 1  | 0 | 7.216302  | -2.946802 | -1.212165 |
| 60 | 1  | 0 | 7.298030  | -1.765508 | 0.955021  |
| 61 | 1  | 0 | -4.557369 | -5.004973 | 0.332442  |
| 62 | 1  | 0 | -4.053623 | -4.240888 | -1.194827 |
| 63 | 1  | 0 | -2.820068 | -4.838758 | -0.063636 |
| 64 | 1  | 0 | -5.061764 | -1.441080 | 0.979373  |
| 65 | 1  | 0 | -5.724462 | -2.661529 | -0.115243 |
| 66 | 1  | 0 | -5.606280 | -2.992249 | 1.631212  |
| 67 | 1  | 0 | -0.231265 | 4.105313  | -2.888792 |
| 68 | 1  | 0 | 1.881818  | 5.475482  | -2.806927 |
| 69 | 1  | 0 | 1.714218  | 4.421938  | -4.217663 |
| 70 | 1  | 0 | 2.817155  | 3.971820  | -2.920189 |
| 71 | 1  | 0 | -0.234849 | 1.685738  | -2.514250 |
| 72 | 1  | 0 | 0.670308  | 2.110393  | -3.969987 |
| 73 | 1  | 0 | 1.531938  | 1.644910  | -2.495367 |
| 74 | 1  | 0 | -3.332692 | 1.242191  | 2.658477  |
| 75 | 1  | 0 | -4.388354 | 1.525046  | 4.857341  |
| 76 | 1  | 0 | -4.969037 | -0.459973 | 6.245833  |
| 77 | 1  | 0 | -4.441697 | -2.740201 | 5.388237  |
| 78 | 1  | 0 | -3.374817 | -3.024463 | 3.193403  |
| 79 | 1  | 0 | 0.313621  | -2.882381 | -2.982837 |
| 80 | 1  | 0 | -0.505209 | -4.435467 | -3.346138 |
| 81 | 1  | 0 | -1.291885 | -3.241418 | -2.257019 |
| 82 | 1  | 0 | 6.757855  | -0.261965 | 2.316531  |
| 83 | 1  | 0 | 4.887339  | 0.504100  | 3.692280  |

|     |    |   |           |           |           |
|-----|----|---|-----------|-----------|-----------|
| 84  | 1  | 0 | 3.870396  | 0.742563  | 2.262039  |
| 85  | 1  | 0 | 4.399809  | -0.880030 | 2.695437  |
| 86  | 1  | 0 | 7.404814  | 1.925139  | 1.266961  |
| 87  | 1  | 0 | 6.789180  | 2.035761  | 2.920630  |
| 88  | 1  | 0 | 5.765566  | 2.526085  | 1.572509  |
| 89  | 1  | 0 | 3.638933  | 0.967646  | -2.743519 |
| 90  | 1  | 0 | 5.758717  | 1.102368  | -4.058660 |
| 91  | 1  | 0 | 4.348714  | 0.774709  | -5.080758 |
| 92  | 1  | 0 | 5.475800  | -0.526855 | -4.686001 |
| 93  | 1  | 0 | 2.385212  | -1.159879 | -2.505528 |
| 94  | 1  | 0 | 2.385541  | -0.588449 | -4.185669 |
| 95  | 1  | 0 | 3.433941  | -1.933079 | -3.705736 |
| 96  | 1  | 0 | 3.150784  | 3.077907  | 2.053001  |
| 97  | 1  | 0 | 3.299822  | 5.551099  | 2.349185  |
| 98  | 1  | 0 | 3.622018  | 4.683301  | 3.861031  |
| 99  | 1  | 0 | 2.063486  | 5.480553  | 3.610438  |
| 100 | 1  | 0 | 0.885692  | 3.144091  | 4.112264  |
| 101 | 1  | 0 | 1.378245  | 1.734253  | 3.158859  |
| 102 | 1  | 0 | 2.494832  | 2.447725  | 4.337736  |
| 103 | 7  | 0 | -3.643167 | 0.449365  | -0.630972 |
| 104 | 16 | 0 | -3.358446 | -0.124461 | -2.178332 |
| 105 | 16 | 0 | -3.999289 | 2.059202  | -0.332145 |
| 106 | 8  | 0 | -2.611896 | 0.796425  | -3.024391 |
| 107 | 8  | 0 | -2.916981 | -1.506353 | -1.995645 |
| 108 | 8  | 0 | -4.038468 | 2.873211  | -1.540595 |
| 109 | 8  | 0 | -3.245250 | 2.481495  | 0.845635  |
| 110 | 6  | 0 | -5.775949 | 1.919902  | 0.248386  |
| 111 | 6  | 0 | -5.063312 | -0.277454 | -2.951354 |
| 112 | 9  | 0 | -5.870248 | 1.047618  | 1.257169  |
| 113 | 9  | 0 | -6.172771 | 3.121614  | 0.667186  |
| 114 | 9  | 0 | -6.560547 | 1.516759  | -0.752141 |
| 115 | 9  | 0 | -5.562758 | 0.917283  | -3.249588 |
| 116 | 9  | 0 | -5.890831 | -0.909223 | -2.110811 |
| 117 | 9  | 0 | -4.935906 | -0.999298 | -4.065711 |
| 118 | 6  | 0 | 1.772129  | -3.420864 | 0.860395  |
| 119 | 6  | 0 | 1.378253  | -3.807595 | 2.148532  |
| 120 | 6  | 0 | 3.128572  | -3.357416 | 0.531209  |
| 121 | 6  | 0 | 2.339980  | -4.102887 | 3.112789  |
| 122 | 1  | 0 | 0.322045  | -3.882680 | 2.384087  |
| 123 | 6  | 0 | 4.084193  | -3.681378 | 1.494822  |
| 124 | 1  | 0 | 3.422004  | -3.072146 | -0.470677 |
| 125 | 6  | 0 | 3.696436  | -4.046352 | 2.786018  |
| 126 | 1  | 0 | 2.028205  | -4.396406 | 4.110905  |
| 127 | 1  | 0 | 5.135892  | -3.640532 | 1.231952  |
| 128 | 1  | 0 | 4.447149  | -4.293178 | 3.531494  |

Sum of electronic and zero-point Energies= -4609.578135  
Sum of electronic and thermal Energies= -4609.504414  
Sum of electronic and thermal Enthalpies= -4609.503470  
Sum of electronic and thermal Free Energies= -4609.696688

### B-tsb3

| Center<br>Number | Atomic<br>Number | Atomic<br>Type | Coordinates (Angstroms) |           |          |
|------------------|------------------|----------------|-------------------------|-----------|----------|
|                  |                  |                | X                       | Y         | Z        |
| 1                | 6                | 0              | 0.810259                | 1.235790  | 1.186672 |
| 2                | 6                | 0              | -0.418073               | 1.666908  | 0.621228 |
| 3                | 6                | 0              | 1.203396                | -0.111453 | 1.220902 |

|    |    |   |           |           |           |
|----|----|---|-----------|-----------|-----------|
| 4  | 7  | 0 | -0.659591 | 3.003524  | 0.464067  |
| 5  | 6  | 0 | 2.573188  | -0.165829 | 1.640269  |
| 6  | 79 | 0 | -1.837688 | 0.201049  | 0.153827  |
| 7  | 6  | 0 | -3.200852 | -1.309915 | -0.225679 |
| 8  | 7  | 0 | -4.557116 | -1.295660 | -0.045357 |
| 9  | 6  | 0 | -5.116933 | -2.512702 | -0.419483 |
| 10 | 6  | 0 | -4.098553 | -3.308612 | -0.822771 |
| 11 | 7  | 0 | -2.933705 | -2.559435 | -0.710640 |
| 12 | 6  | 0 | -5.378234 | -0.161470 | 0.344744  |
| 13 | 6  | 0 | -1.616799 | -3.135864 | -0.914884 |
| 14 | 6  | 0 | -1.047441 | -3.823864 | 0.179583  |
| 15 | 6  | 0 | 0.211375  | -4.409755 | -0.000767 |
| 16 | 6  | 0 | 0.881117  | -4.315773 | -1.214879 |
| 17 | 6  | 0 | 0.284373  | -3.650654 | -2.280823 |
| 18 | 6  | 0 | -0.979607 | -3.053114 | -2.174016 |
| 19 | 6  | 0 | -5.688013 | 0.065242  | 1.705150  |
| 20 | 6  | 0 | -6.526018 | 1.153550  | 1.987978  |
| 21 | 6  | 0 | -7.047554 | 1.964790  | 0.986311  |
| 22 | 6  | 0 | -6.743775 | 1.700542  | -0.342674 |
| 23 | 6  | 0 | -5.904077 | 0.637568  | -0.693875 |
| 24 | 7  | 0 | 1.842595  | 2.057265  | 1.649231  |
| 25 | 6  | 0 | 2.853965  | 1.271471  | 1.937667  |
| 26 | 7  | 0 | 4.028606  | 1.784632  | 2.455784  |
| 27 | 6  | 0 | 4.091950  | 3.235792  | 2.596516  |
| 28 | 6  | 0 | 5.304439  | 1.169645  | 2.105514  |
| 29 | 1  | 0 | 3.141896  | -0.306245 | 0.253454  |
| 30 | 6  | 0 | -1.511170 | -2.371842 | -3.441214 |
| 31 | 6  | 0 | -2.946895 | -2.741221 | -3.855955 |
| 32 | 6  | 0 | -1.300776 | -0.844985 | -3.429268 |
| 33 | 6  | 0 | -5.627695 | 0.364615  | -2.170791 |
| 34 | 6  | 0 | -6.829418 | -0.337695 | -2.836712 |
| 35 | 6  | 0 | -5.251942 | 1.641317  | -2.945450 |
| 36 | 6  | 0 | -5.215034 | -0.753409 | 2.912917  |
| 37 | 6  | 0 | -5.554975 | -2.255010 | 2.863557  |
| 38 | 6  | 0 | -3.737206 | -0.516678 | 3.275942  |
| 39 | 6  | 0 | -1.752608 | -3.986994 | 1.525357  |
| 40 | 6  | 0 | -2.135355 | -5.461188 | 1.769544  |
| 41 | 6  | 0 | -0.917331 | -3.434076 | 2.695288  |
| 42 | 6  | 0 | 3.056262  | -1.315905 | 2.482900  |
| 43 | 6  | 0 | 3.581835  | -1.098454 | 3.768880  |
| 44 | 6  | 0 | 3.960782  | -2.168448 | 4.580950  |
| 45 | 6  | 0 | 3.816234  | -3.481954 | 4.133856  |
| 46 | 6  | 0 | 3.284649  | -3.711233 | 2.863482  |
| 47 | 6  | 0 | 2.906962  | -2.642965 | 2.049727  |
| 48 | 6  | 0 | -1.479041 | 3.202600  | -2.175244 |
| 49 | 16 | 0 | -2.050270 | 3.546895  | -0.500697 |
| 50 | 8  | 0 | -2.131360 | 4.992727  | -0.318850 |
| 51 | 8  | 0 | -3.214081 | 2.706621  | -0.206515 |
| 52 | 1  | 0 | 0.601584  | -0.961912 | 0.929008  |
| 53 | 1  | 0 | -6.176731 | -2.693436 | -0.350303 |
| 54 | 1  | 0 | -4.087176 | -4.324952 | -1.180280 |
| 55 | 1  | 0 | 0.671269  | -4.942127 | 0.825694  |
| 56 | 1  | 0 | 1.869763  | -4.745324 | -1.331304 |
| 57 | 1  | 0 | 0.811584  | -3.586508 | -3.228155 |
| 58 | 1  | 0 | -6.776525 | 1.359225  | 3.024781  |
| 59 | 1  | 0 | -7.695237 | 2.797780  | 1.243457  |
| 60 | 1  | 0 | -7.158658 | 2.330692  | -1.122217 |
| 61 | 1  | 0 | 3.159258  | 3.605316  | 3.020485  |
| 62 | 1  | 0 | 4.926368  | 3.485723  | 3.259224  |

|     |    |   |            |            |            |
|-----|----|---|------------|------------|------------|
| 63  | 1  | 0 | 4. 241483  | 3. 738263  | 1. 629776  |
| 64  | 1  | 0 | 6. 057209  | 1. 465700  | 2. 843155  |
| 65  | 1  | 0 | 5. 230455  | 0. 085350  | 2. 120816  |
| 66  | 1  | 0 | 5. 653352  | 1. 483507  | 1. 111314  |
| 67  | 1  | 0 | -0. 867478 | -2. 757905 | -4. 240587 |
| 68  | 1  | 0 | -3. 107096 | -3. 824457 | -3. 831211 |
| 69  | 1  | 0 | -3. 123037 | -2. 405131 | -4. 883353 |
| 70  | 1  | 0 | -3. 704490 | -2. 270021 | -3. 225955 |
| 71  | 1  | 0 | -0. 250230 | -0. 594074 | -3. 255300 |
| 72  | 1  | 0 | -1. 595510 | -0. 421758 | -4. 396731 |
| 73  | 1  | 0 | -1. 897872 | -0. 365632 | -2. 647643 |
| 74  | 1  | 0 | -4. 770055 | -0. 309771 | -2. 238732 |
| 75  | 1  | 0 | -7. 071363 | -1. 285389 | -2. 345609 |
| 76  | 1  | 0 | -6. 614799 | -0. 549601 | -3. 889774 |
| 77  | 1  | 0 | -7. 722563 | 0. 295290  | -2. 796269 |
| 78  | 1  | 0 | -4. 460584 | 2. 188102  | -2. 428443 |
| 79  | 1  | 0 | -4. 907170 | 1. 379195  | -3. 951500 |
| 80  | 1  | 0 | -6. 107355 | 2. 314970  | -3. 062327 |
| 81  | 1  | 0 | -5. 797696 | -0. 351367 | 3. 750675  |
| 82  | 1  | 0 | -6. 604273 | -2. 418917 | 2. 595462  |
| 83  | 1  | 0 | -5. 392222 | -2. 697362 | 3. 852219  |
| 84  | 1  | 0 | -4. 932323 | -2. 805279 | 2. 154820  |
| 85  | 1  | 0 | -3. 522562 | 0. 551485  | 3. 373411  |
| 86  | 1  | 0 | -3. 506738 | -0. 999931 | 4. 232167  |
| 87  | 1  | 0 | -3. 057681 | -0. 920007 | 2. 521838  |
| 88  | 1  | 0 | -2. 681821 | -3. 412754 | 1. 501743  |
| 89  | 1  | 0 | -2. 766485 | -5. 852338 | 0. 964637  |
| 90  | 1  | 0 | -2. 685536 | -5. 561532 | 2. 711256  |
| 91  | 1  | 0 | -1. 246931 | -6. 098139 | 1. 833093  |
| 92  | 1  | 0 | -0. 694417 | -2. 372240 | 2. 558709  |
| 93  | 1  | 0 | -1. 469618 | -3. 545225 | 3. 634669  |
| 94  | 1  | 0 | 0. 035655  | -3. 959553 | 2. 806974  |
| 95  | 1  | 0 | 3. 688642  | -0. 082355 | 4. 134045  |
| 96  | 1  | 0 | 4. 364088  | -1. 970133 | 5. 570519  |
| 97  | 1  | 0 | 4. 115147  | -4. 314473 | 4. 764478  |
| 98  | 1  | 0 | 3. 174451  | -4. 727951 | 2. 494894  |
| 99  | 1  | 0 | 2. 510498  | -2. 842250 | 1. 061952  |
| 100 | 1  | 0 | -1. 280062 | 2. 135318  | -2. 270500 |
| 101 | 1  | 0 | -2. 279565 | 3. 515619  | -2. 848066 |
| 102 | 1  | 0 | -0. 577549 | 3. 789228  | -2. 351096 |
| 103 | 7  | 0 | 3. 682416  | -0. 391965 | -0. 937019 |
| 104 | 16 | 0 | 4. 471691  | -1. 786526 | -1. 453713 |
| 105 | 16 | 0 | 3. 194843  | 0. 761962  | -2. 051014 |
| 106 | 8  | 0 | 3. 800963  | -2. 963813 | -0. 908101 |
| 107 | 8  | 0 | 4. 847798  | -1. 723336 | -2. 860519 |
| 108 | 8  | 0 | 2. 346607  | 1. 699176  | -1. 319941 |
| 109 | 8  | 0 | 2. 750204  | 0. 193986  | -3. 318531 |
| 110 | 6  | 0 | 4. 749577  | 1. 750041  | -2. 412871 |
| 111 | 6  | 0 | 6. 080782  | -1. 649504 | -0. 504163 |
| 112 | 9  | 0 | 4. 409851  | 2. 740351  | -3. 242858 |
| 113 | 9  | 0 | 5. 218822  | 2. 277271  | -1. 276393 |
| 114 | 9  | 0 | 5. 696268  | 1. 006300  | -2. 975676 |
| 115 | 9  | 0 | 6. 641793  | -0. 454188 | -0. 708836 |
| 116 | 9  | 0 | 6. 900534  | -2. 603121 | -0. 946108 |
| 117 | 9  | 0 | 5. 871218  | -1. 821059 | 0. 803063  |
| 118 | 6  | 0 | 0. 172970  | 4. 120813  | 0. 879338  |
| 119 | 6  | 0 | 1. 198991  | 4. 581296  | 0. 052274  |
| 120 | 6  | 0 | -0. 134068 | 4. 773896  | 2. 071530  |
| 121 | 6  | 0 | 1. 926925  | 5. 706242  | 0. 432951  |

|     |   |   |           |          |           |
|-----|---|---|-----------|----------|-----------|
| 122 | 1 | 0 | 1.453923  | 4.031629 | -0.847017 |
| 123 | 6 | 0 | 0.605886  | 5.894092 | 2.450358  |
| 124 | 1 | 0 | -0.946333 | 4.406088 | 2.689704  |
| 125 | 6 | 0 | 1.632393  | 6.364812 | 1.629992  |
| 126 | 1 | 0 | 2.730370  | 6.065769 | -0.203346 |
| 127 | 1 | 0 | 0.371328  | 6.404417 | 3.379844  |
| 128 | 1 | 0 | 2.201423  | 7.243068 | 1.921247  |

Sum of electronic and zero-point Energies= -4609.555854  
Sum of electronic and thermal Energies= -4609.481883  
Sum of electronic and thermal Enthalpies= -4609.480939  
Sum of electronic and thermal Free Energies= -4609.674581

### B-a3

| Center Number | Atomic Number | Atomic Type | Coordinates (Angstroms) |           |           |
|---------------|---------------|-------------|-------------------------|-----------|-----------|
|               |               |             | X                       | Y         | Z         |
| 1             | 6             | 0           | -1.645698               | -0.234236 | -0.150826 |
| 2             | 6             | 0           | -2.169073               | -1.491402 | 0.173524  |
| 3             | 6             | 0           | -2.642196               | 0.732271  | -0.402936 |
| 4             | 7             | 0           | -1.253823               | -2.585751 | 0.441809  |
| 5             | 6             | 0           | -4.014283               | 0.474776  | -0.315908 |
| 6             | 79            | 0           | 0.340992                | 0.304530  | -0.093820 |
| 7             | 6             | 0           | 2.275641                | 1.039369  | 0.035222  |
| 8             | 7             | 0           | 3.477676                | 0.398609  | 0.152493  |
| 9             | 6             | 0           | 4.524069                | 1.313253  | 0.236272  |
| 10            | 6             | 0           | 3.971544                | 2.548742  | 0.198169  |
| 11            | 7             | 0           | 2.599199                | 2.369977  | 0.058004  |
| 12            | 6             | 0           | 3.711004                | -1.030475 | 0.052157  |
| 13            | 6             | 0           | 1.649868                | 3.466605  | 0.101137  |
| 14            | 6             | 0           | 1.134056                | 3.825815  | 1.365241  |
| 15            | 6             | 0           | 0.233996                | 4.897407  | 1.426716  |
| 16            | 6             | 0           | -0.135295               | 5.591148  | 0.281806  |
| 17            | 6             | 0           | 0.398551                | 5.223777  | -0.949605 |
| 18            | 6             | 0           | 1.301551                | 4.159381  | -1.081887 |
| 19            | 6             | 0           | 3.879463                | -1.564914 | -1.243341 |
| 20            | 6             | 0           | 4.177045                | -2.928523 | -1.357956 |
| 21            | 6             | 0           | 4.305277                | -3.730704 | -0.231161 |
| 22            | 6             | 0           | 4.133995                | -3.177257 | 1.033970  |
| 23            | 6             | 0           | 3.838318                | -1.818798 | 1.219787  |
| 24            | 7             | 0           | -3.472732               | -1.801763 | 0.231687  |
| 25            | 6             | 0           | -4.390710               | -0.858388 | -0.003335 |
| 26            | 7             | 0           | -5.748925               | -1.237985 | 0.095243  |
| 27            | 6             | 0           | -6.017228               | -2.491267 | 0.786508  |
| 28            | 6             | 0           | -6.556582               | -1.096220 | -1.116900 |
| 29            | 6             | 0           | 1.783658                | 3.853626  | -2.505337 |
| 30            | 6             | 0           | 3.309438                | 3.883420  | -2.715919 |
| 31            | 6             | 0           | 1.156928                | 2.573303  | -3.089294 |
| 32            | 6             | 0           | -4.974379               | 1.601068  | -0.479354 |
| 33            | 6             | 0           | -4.853016               | 2.484698  | -1.565192 |
| 34            | 6             | 0           | -5.703876               | 3.583622  | -1.696586 |
| 35            | 6             | 0           | -6.692867               | 3.822361  | -0.742126 |
| 36            | 6             | 0           | -6.824738               | 2.951424  | 0.343053  |
| 37            | 6             | 0           | -5.978202               | 1.852278  | 0.473342  |
| 38            | 6             | 0           | -2.592933               | -4.468479 | 2.002491  |
| 39            | 16            | 0           | -1.281581               | -3.228059 | 2.016705  |
| 40            | 8             | 0           | -1.678459               | -2.137664 | 2.907970  |
| 41            | 8             | 0           | -0.017052               | -3.941534 | 2.239039  |

|     |   |   |           |           |           |
|-----|---|---|-----------|-----------|-----------|
| 42  | 6 | 0 | 3.663186  | -1.355737 | 2.671167  |
| 43  | 6 | 0 | 2.190451  | -1.095470 | 3.039021  |
| 44  | 6 | 0 | 4.579452  | -0.201647 | 3.120443  |
| 45  | 6 | 0 | 3.759336  | -0.729611 | -2.515348 |
| 46  | 6 | 0 | 5.081326  | -0.712156 | -3.308052 |
| 47  | 6 | 0 | 2.587204  | -1.211501 | -3.392192 |
| 48  | 6 | 0 | 1.520030  | 3.116202  | 2.660625  |
| 49  | 6 | 0 | 2.294760  | 4.061197  | 3.601222  |
| 50  | 6 | 0 | 0.292055  | 2.508937  | 3.365979  |
| 51  | 1 | 0 | -2.340839 | 1.754496  | -0.616235 |
| 52  | 1 | 0 | 5.549832  | 0.995445  | 0.324023  |
| 53  | 1 | 0 | 4.416531  | 3.528628  | 0.250912  |
| 54  | 1 | 0 | -0.179668 | 5.187204  | 2.387454  |
| 55  | 1 | 0 | -0.834854 | 6.419544  | 0.346008  |
| 56  | 1 | 0 | 0.108779  | 5.772649  | -1.841271 |
| 57  | 1 | 0 | 4.310143  | -3.360916 | -2.344700 |
| 58  | 1 | 0 | 4.540237  | -4.786315 | -0.334254 |
| 59  | 1 | 0 | 4.228483  | -3.811137 | 1.910618  |
| 60  | 1 | 0 | -7.093586 | -2.553531 | 0.979209  |
| 61  | 1 | 0 | -5.716363 | -3.381074 | 0.210267  |
| 62  | 1 | 0 | -5.489641 | -2.509254 | 1.741794  |
| 63  | 1 | 0 | -6.355512 | -0.144885 | -1.607664 |
| 64  | 1 | 0 | -6.363296 | -1.909840 | -1.837361 |
| 65  | 1 | 0 | -7.618734 | -1.121345 | -0.851649 |
| 66  | 1 | 0 | 1.391463  | 4.684258  | -3.104955 |
| 67  | 1 | 0 | 3.758623  | 4.776293  | -2.267682 |
| 68  | 1 | 0 | 3.526648  | 3.906708  | -3.789288 |
| 69  | 1 | 0 | 3.808748  | 3.004825  | -2.302001 |
| 70  | 1 | 0 | 0.065111  | 2.608981  | -3.032035 |
| 71  | 1 | 0 | 1.439795  | 2.466477  | -4.142845 |
| 72  | 1 | 0 | 1.479760  | 1.676863  | -2.555775 |
| 73  | 1 | 0 | -4.090809 | 2.297852  | -2.316634 |
| 74  | 1 | 0 | -5.594872 | 4.249879  | -2.548168 |
| 75  | 1 | 0 | -7.356705 | 4.676490  | -0.842514 |
| 76  | 1 | 0 | -7.588680 | 3.132006  | 1.094568  |
| 77  | 1 | 0 | -6.088726 | 1.174935  | 1.313036  |
| 78  | 1 | 0 | -2.322878 | -5.245325 | 1.286056  |
| 79  | 1 | 0 | -2.658633 | -4.881217 | 3.010636  |
| 80  | 1 | 0 | -3.513100 | -3.966481 | 1.706571  |
| 81  | 1 | 0 | 3.975502  | -2.222191 | 3.266713  |
| 82  | 1 | 0 | 2.110407  | -0.867527 | 4.108124  |
| 83  | 1 | 0 | 1.770250  | -0.254485 | 2.481680  |
| 84  | 1 | 0 | 1.571305  | -1.971844 | 2.833322  |
| 85  | 1 | 0 | 5.620314  | -0.370998 | 2.822483  |
| 86  | 1 | 0 | 4.555914  | -0.129426 | 4.213058  |
| 87  | 1 | 0 | 4.263952  | 0.766333  | 2.725156  |
| 88  | 1 | 0 | 3.543119  | 0.303023  | -2.231711 |
| 89  | 1 | 0 | 5.910610  | -0.339120 | -2.697869 |
| 90  | 1 | 0 | 4.988227  | -0.064190 | -4.186168 |
| 91  | 1 | 0 | 5.353227  | -1.711911 | -3.662802 |
| 92  | 1 | 0 | 1.643815  | -1.179369 | -2.839755 |
| 93  | 1 | 0 | 2.490671  | -0.574013 | -4.277879 |
| 94  | 1 | 0 | 2.738708  | -2.239963 | -3.736196 |
| 95  | 1 | 0 | 2.187650  | 2.287206  | 2.415749  |
| 96  | 1 | 0 | 3.191788  | 4.463427  | 3.118435  |
| 97  | 1 | 0 | 2.606744  | 3.525422  | 4.503943  |
| 98  | 1 | 0 | 1.677607  | 4.909749  | 3.915391  |
| 99  | 1 | 0 | -0.417179 | 3.282312  | 3.679834  |
| 100 | 1 | 0 | -0.234043 | 1.809775  | 2.709744  |

|     |   |   |           |           |           |
|-----|---|---|-----------|-----------|-----------|
| 101 | 1 | 0 | 0.604851  | 1.962897  | 4.262040  |
| 102 | 6 | 0 | -0.866829 | -3.439768 | -0.647994 |
| 103 | 6 | 0 | 0.433988  | -3.960718 | -0.704907 |
| 104 | 6 | 0 | -1.776381 | -3.740408 | -1.674293 |
| 105 | 6 | 0 | 0.805752  | -4.784678 | -1.766949 |
| 106 | 1 | 0 | 1.135938  | -3.722289 | 0.083047  |
| 107 | 6 | 0 | -1.384074 | -4.544860 | -2.744082 |
| 108 | 1 | 0 | -2.783576 | -3.343880 | -1.623190 |
| 109 | 6 | 0 | -0.094647 | -5.077199 | -2.793217 |
| 110 | 1 | 0 | 1.815123  | -5.184642 | -1.796272 |
| 111 | 1 | 0 | -2.096124 | -4.764458 | -3.534983 |
| 112 | 1 | 0 | 0.205611  | -5.710568 | -3.623182 |

Sum of electronic and zero-point Energies= -2781.975964  
Sum of electronic and thermal Energies= -2781.918451  
Sum of electronic and thermal Enthalpies= -2781.917507  
Sum of electronic and thermal Free Energies= -2782.074208

### B-b3

| Center<br>Number | Atomic<br>Number | Atomic<br>Type | Coordinates (Angstroms) |           |           |
|------------------|------------------|----------------|-------------------------|-----------|-----------|
|                  |                  |                | X                       | Y         | Z         |
| 1                | 6                | 0              | -2.340120               | -0.920063 | -0.436211 |
| 2                | 6                | 0              | -1.050518               | -1.410980 | -0.495239 |
| 3                | 6                | 0              | -2.701404               | 0.467663  | -0.209703 |
| 4                | 7                | 0              | -0.914669               | -2.825577 | -0.620694 |
| 5                | 6                | 0              | -4.069075               | 0.540837  | -0.176270 |
| 6                | 79               | 0              | 0.583113                | -0.164792 | -0.223729 |
| 7                | 6                | 0              | 2.148313                | 1.134886  | 0.170275  |
| 8                | 7                | 0              | 3.362322                | 0.864941  | 0.740067  |
| 9                | 6                | 0              | 4.123357                | 2.023258  | 0.860359  |
| 10               | 6                | 0              | 3.371257                | 3.041983  | 0.380809  |
| 11               | 7                | 0              | 2.171730                | 2.485482  | -0.051464 |
| 12               | 6                | 0              | 3.896192                | -0.448495 | 1.058247  |
| 13               | 6                | 0              | 1.057301                | 3.289004  | -0.515698 |
| 14               | 6                | 0              | 0.169826                | 3.786598  | 0.463812  |
| 15               | 6                | 0              | -0.896700               | 4.587848  | 0.036366  |
| 16               | 6                | 0              | -1.071211               | 4.890445  | -1.308469 |
| 17               | 6                | 0              | -0.172214               | 4.399553  | -2.250097 |
| 18               | 6                | 0              | 0.916190                | 3.592337  | -1.889452 |
| 19               | 6                | 0              | 3.750282                | -0.985914 | 2.357356  |
| 20               | 6                | 0              | 4.333394                | -2.239643 | 2.590372  |
| 21               | 6                | 0              | 5.033576                | -2.923865 | 1.602754  |
| 22               | 6                | 0              | 5.175882                | -2.359556 | 0.342137  |
| 23               | 6                | 0              | 4.612854                | -1.114406 | 0.040567  |
| 24               | 7                | 0              | -3.504466               | -1.681779 | -0.583635 |
| 25               | 6                | 0              | -4.510493               | -0.847697 | -0.440915 |
| 26               | 7                | 0              | -5.830425               | -1.283759 | -0.507216 |
| 27               | 6                | 0              | -6.009224               | -2.729540 | -0.593936 |
| 28               | 6                | 0              | -6.754541               | -0.548661 | -1.369326 |
| 29               | 6                | 0              | 1.824165                | 3.127044  | -3.034514 |
| 30               | 6                | 0              | 3.315073                | 3.485244  | -2.886564 |
| 31               | 6                | 0              | 1.632907                | 1.641693  | -3.396324 |
| 32               | 6                | 0              | 4.829452                | -0.517967 | -1.348189 |
| 33               | 6                | 0              | 6.261078                | 0.040148  | -1.488425 |
| 34               | 6                | 0              | 4.521224                | -1.522545 | -2.474162 |
| 35               | 6                | 0              | 3.013303                | -0.354496 | 3.545098  |
| 36               | 6                | 0              | 3.465867                | 1.064509  | 3.937020  |

|    |    |   |           |           |           |
|----|----|---|-----------|-----------|-----------|
| 37 | 6  | 0 | 1.480693  | -0.446544 | 3.421645  |
| 38 | 6  | 0 | 0.346377  | 3.527697  | 1.958795  |
| 39 | 6  | 0 | 0.762748  | 4.820723  | 2.690118  |
| 40 | 6  | 0 | -0.910680 | 2.911794  | 2.601094  |
| 41 | 6  | 0 | -4.865391 | 1.728259  | 0.175322  |
| 42 | 6  | 0 | -5.992094 | 1.633049  | 1.015562  |
| 43 | 6  | 0 | -6.703188 | 2.771265  | 1.393074  |
| 44 | 6  | 0 | -6.308782 | 4.033628  | 0.943877  |
| 45 | 6  | 0 | -5.194710 | 4.144179  | 0.108519  |
| 46 | 6  | 0 | -4.484283 | 3.007031  | -0.273845 |
| 47 | 6  | 0 | 0.189794  | -2.789852 | -3.105189 |
| 48 | 16 | 0 | 0.450246  | -3.450289 | -1.448262 |
| 49 | 8  | 0 | 0.296602  | -4.905616 | -1.492052 |
| 50 | 8  | 0 | 1.710743  | -2.882775 | -0.941181 |
| 51 | 1  | 0 | -2.002421 | 1.275856  | -0.041444 |
| 52 | 1  | 0 | 5.114311  | 2.009168  | 1.282982  |
| 53 | 1  | 0 | 3.571873  | 4.097446  | 0.298420  |
| 54 | 1  | 0 | -1.596857 | 4.976280  | 0.768723  |
| 55 | 1  | 0 | -1.901382 | 5.515570  | -1.624554 |
| 56 | 1  | 0 | -0.309988 | 4.647605  | -3.298721 |
| 57 | 1  | 0 | 4.231905  | -2.683689 | 3.576629  |
| 58 | 1  | 0 | 5.469940  | -3.894514 | 1.819243  |
| 59 | 1  | 0 | 5.725722  | -2.893823 | -0.425388 |
| 60 | 1  | 0 | -5.368452 | -3.224339 | 0.135552  |
| 61 | 1  | 0 | -7.058715 | -2.963715 | -0.386209 |
| 62 | 1  | 0 | -5.749382 | -3.124446 | -1.588264 |
| 63 | 1  | 0 | -7.785210 | -0.768158 | -1.071098 |
| 64 | 1  | 0 | -6.596105 | 0.524796  | -1.283443 |
| 65 | 1  | 0 | -6.636141 | -0.835199 | -2.427683 |
| 66 | 1  | 0 | 1.471969  | 3.697162  | -3.902920 |
| 67 | 1  | 0 | 3.448449  | 4.534264  | -2.601059 |
| 68 | 1  | 0 | 3.820523  | 3.336546  | -3.846801 |
| 69 | 1  | 0 | 3.826738  | 2.862581  | -2.149674 |
| 70 | 1  | 0 | 0.578833  | 1.417797  | -3.585889 |
| 71 | 1  | 0 | 2.202044  | 1.404340  | -4.302513 |
| 72 | 1  | 0 | 1.970177  | 0.977884  | -2.596919 |
| 73 | 1  | 0 | 4.136698  | 0.318206  | -1.472487 |
| 74 | 1  | 0 | 6.474972  | 0.807005  | -0.736697 |
| 75 | 1  | 0 | 6.402845  | 0.488784  | -2.477801 |
| 76 | 1  | 0 | 7.004535  | -0.755917 | -1.371521 |
| 77 | 1  | 0 | 3.538977  | -1.978487 | -2.330646 |
| 78 | 1  | 0 | 4.543071  | -1.011781 | -3.443268 |
| 79 | 1  | 0 | 5.264551  | -2.325972 | -2.516383 |
| 80 | 1  | 0 | 3.286114  | -0.990675 | 4.395995  |
| 81 | 1  | 0 | 4.557197  | 1.134078  | 4.000844  |
| 82 | 1  | 0 | 3.059968  | 1.314854  | 4.923134  |
| 83 | 1  | 0 | 3.116094  | 1.827685  | 3.238518  |
| 84 | 1  | 0 | 1.166630  | -1.476909 | 3.230881  |
| 85 | 1  | 0 | 1.009502  | -0.112379 | 4.353214  |
| 86 | 1  | 0 | 1.095273  | 0.168042  | 2.604541  |
| 87 | 1  | 0 | 1.155250  | 2.805356  | 2.090211  |
| 88 | 1  | 0 | 1.682614  | 5.242565  | 2.271692  |
| 89 | 1  | 0 | 0.935407  | 4.618909  | 3.752620  |
| 90 | 1  | 0 | -0.016800 | 5.586733  | 2.618198  |
| 91 | 1  | 0 | -1.184604 | 1.970416  | 2.117601  |
| 92 | 1  | 0 | -0.725168 | 2.707874  | 3.661038  |
| 93 | 1  | 0 | -1.773142 | 3.583333  | 2.541661  |
| 94 | 1  | 0 | -6.297891 | 0.654830  | 1.373478  |
| 95 | 1  | 0 | -7.566262 | 2.671971  | 2.046127  |



|     |   |   |           |           |           |
|-----|---|---|-----------|-----------|-----------|
| 96  | 1 | 0 | -6.865436 | 4.919278  | 1.237064  |
| 97  | 1 | 0 | -4.885614 | 5.120362  | -0.257245 |
| 98  | 1 | 0 | -3.628705 | 3.098380  | -0.936307 |
| 99  | 1 | 0 | 0.156600  | -1.701749 | -3.051491 |
| 100 | 1 | 0 | 1.034947  | -3.124746 | -3.709396 |
| 101 | 1 | 0 | -0.748002 | -3.190135 | -3.490324 |
| 102 | 6 | 0 | -1.628985 | -3.744241 | 0.234275  |
| 103 | 6 | 0 | -2.409121 | -4.773446 | -0.298806 |
| 104 | 6 | 0 | -1.526379 | -3.591723 | 1.620599  |
| 105 | 6 | 0 | -3.079675 | -5.646923 | 0.554529  |
| 106 | 1 | 0 | -2.490246 | -4.878422 | -1.373573 |
| 107 | 6 | 0 | -2.216175 | -4.456615 | 2.470085  |
| 108 | 1 | 0 | -0.914862 | -2.789759 | 2.021043  |
| 109 | 6 | 0 | -2.991293 | -5.489290 | 1.940428  |
| 110 | 1 | 0 | -3.681560 | -6.448224 | 0.135119  |
| 111 | 1 | 0 | -2.137778 | -4.328743 | 3.546171  |
| 112 | 1 | 0 | -3.522162 | -6.168329 | 2.601698  |

Sum of electronic and zero-point Energies= -2781.942976  
Sum of electronic and thermal Energies= -2781.884960  
Sum of electronic and thermal Enthalpies= -2781.884015  
Sum of electronic and thermal Free Energies= -2782.042481

#### B-tsa4

| Center<br>Number | Atomic<br>Number | Atomic<br>Type | Coordinates (Angstroms) |           |           |
|------------------|------------------|----------------|-------------------------|-----------|-----------|
|                  |                  |                | X                       | Y         | Z         |
| 1                | 6                | 0              | -1.018593               | 0.732752  | 0.297190  |
| 2                | 6                | 0              | -1.124982               | 2.150115  | 0.459047  |
| 3                | 6                | 0              | -1.903608               | 0.027736  | 1.162973  |
| 4                | 7                | 0              | -0.292984               | 3.024461  | -0.300401 |
| 5                | 6                | 0              | -2.760254               | 0.615183  | 2.084603  |
| 6                | 79               | 0              | 0.919744                | -0.153427 | 0.254960  |
| 7                | 6                | 0              | 2.759567                | -1.016896 | 0.605994  |
| 8                | 7                | 0              | 4.015037                | -0.568952 | 0.298475  |
| 9                | 6                | 0              | 4.984384                | -1.439486 | 0.785993  |
| 10               | 6                | 0              | 4.331971                | -2.456551 | 1.397356  |
| 11               | 7                | 0              | 2.972871                | -2.178932 | 1.298557  |
| 12               | 6                | 0              | 4.337025                | 0.719974  | -0.289176 |
| 13               | 6                | 0              | 1.941682                | -3.088602 | 1.761985  |
| 14               | 6                | 0              | 1.538243                | -4.109416 | 0.874194  |
| 15               | 6                | 0              | 0.521050                | -4.978103 | 1.290061  |
| 16               | 6                | 0              | -0.058623               | -4.853386 | 2.545841  |
| 17               | 6                | 0              | 0.394202                | -3.869471 | 3.419706  |
| 18               | 6                | 0              | 1.406271                | -2.964776 | 3.066149  |
| 19               | 6                | 0              | 4.426449                | 1.822735  | 0.591398  |
| 20               | 6                | 0              | 4.716614                | 3.076616  | 0.040252  |
| 21               | 6                | 0              | 4.940187                | 3.225251  | -1.323077 |
| 22               | 6                | 0              | 4.896452                | 2.112847  | -2.157276 |
| 23               | 6                | 0              | 4.597092                | 0.830034  | -1.673766 |
| 24               | 7                | 0              | -1.929995               | 2.758683  | 1.323106  |
| 25               | 6                | 0              | -2.682539               | 2.039858  | 2.177327  |
| 26               | 7                | 0              | -3.395222               | 2.769817  | 3.105857  |
| 27               | 6                | 0              | -3.462552               | 4.218603  | 2.958635  |
| 28               | 6                | 0              | -3.571976               | 2.309926  | 4.481349  |
| 29               | 6                | 0              | 1.819018                | -1.961256 | 4.152057  |
| 30               | 6                | 0              | 3.324532                | -1.915462 | 4.474073  |
| 31               | 6                | 0              | 1.246031                | -0.547390 | 3.939705  |

|    |    |   |           |           |           |
|----|----|---|-----------|-----------|-----------|
| 32 | 6  | 0 | -3.766233 | -0.229435 | 2.785810  |
| 33 | 6  | 0 | -3.384446 | -1.414729 | 3.435926  |
| 34 | 6  | 0 | -4.336257 | -2.243878 | 4.032073  |
| 35 | 6  | 0 | -5.689061 | -1.905173 | 3.990189  |
| 36 | 6  | 0 | -6.083007 | -0.732147 | 3.340842  |
| 37 | 6  | 0 | -5.134116 | 0.095547  | 2.743857  |
| 38 | 6  | 0 | -1.073650 | 5.657994  | 0.204689  |
| 39 | 16 | 0 | 0.279162  | 4.485904  | 0.402150  |
| 40 | 8  | 0 | 1.377091  | 4.945261  | -0.450988 |
| 41 | 8  | 0 | 0.511300  | 4.252820  | 1.828754  |
| 42 | 6  | 0 | 4.629621  | -0.310403 | -2.698342 |
| 43 | 6  | 0 | 3.310991  | -1.080502 | -2.866780 |
| 44 | 6  | 0 | 5.823941  | -1.268262 | -2.506881 |
| 45 | 6  | 0 | 4.313290  | 1.677647  | 2.108020  |
| 46 | 6  | 0 | 5.723322  | 1.589528  | 2.733166  |
| 47 | 6  | 0 | 3.500587  | 2.797561  | 2.778929  |
| 48 | 6  | 0 | 2.184386  | -4.335010 | -0.490556 |
| 49 | 6  | 0 | 2.915231  | -5.692889 | -0.531598 |
| 50 | 6  | 0 | 1.167817  | -4.211651 | -1.638254 |
| 51 | 1  | 0 | -1.959643 | -1.051977 | 1.052196  |
| 52 | 1  | 0 | 6.036363  | -1.248100 | 0.655840  |
| 53 | 1  | 0 | 4.697741  | -3.338103 | 1.897347  |
| 54 | 1  | 0 | 0.187582  | -5.763390 | 0.619071  |
| 55 | 1  | 0 | -0.847399 | -5.533558 | 2.854035  |
| 56 | 1  | 0 | -0.038933 | -3.799443 | 4.413737  |
| 57 | 1  | 0 | 4.763885  | 3.944726  | 0.687722  |
| 58 | 1  | 0 | 5.153152  | 4.206790  | -1.735476 |
| 59 | 1  | 0 | 5.096237  | 2.233462  | -3.218330 |
| 60 | 1  | 0 | -4.253122 | 4.590423  | 3.617061  |
| 61 | 1  | 0 | -2.516949 | 4.710599  | 3.223720  |
| 62 | 1  | 0 | -3.716056 | 4.479378  | 1.930536  |
| 63 | 1  | 0 | -3.216200 | 1.290164  | 4.602312  |
| 64 | 1  | 0 | -2.998173 | 2.955379  | 5.160585  |
| 65 | 1  | 0 | -4.626437 | 2.342407  | 4.778995  |
| 66 | 1  | 0 | 1.340408  | -2.346393 | 5.060984  |
| 67 | 1  | 0 | 3.739710  | -2.921538 | 4.597659  |
| 68 | 1  | 0 | 3.475888  | -1.376813 | 5.415576  |
| 69 | 1  | 0 | 3.904255  | -1.397608 | 3.707355  |
| 70 | 1  | 0 | 0.160095  | -0.574018 | 3.811636  |
| 71 | 1  | 0 | 1.469828  | 0.077945  | 4.811386  |
| 72 | 1  | 0 | 1.662787  | -0.060302 | 3.055706  |
| 73 | 1  | 0 | -2.332567 | -1.684727 | 3.476065  |
| 74 | 1  | 0 | -4.018196 | -3.154173 | 4.533149  |
| 75 | 1  | 0 | -6.430032 | -2.548770 | 4.455528  |
| 76 | 1  | 0 | -7.135256 | -0.465957 | 3.290126  |
| 77 | 1  | 0 | -5.447564 | 0.998407  | 2.228932  |
| 78 | 1  | 0 | -1.930993 | 5.267406  | 0.747676  |
| 79 | 1  | 0 | -0.732630 | 6.611196  | 0.613116  |
| 80 | 1  | 0 | -1.282874 | 5.752616  | -0.861642 |
| 81 | 1  | 0 | 4.808082  | 0.195158  | -3.655343 |
| 82 | 1  | 0 | 3.385339  | -1.746647 | -3.733708 |
| 83 | 1  | 0 | 3.077287  | -1.697433 | -1.997428 |
| 84 | 1  | 0 | 2.463496  | -0.412407 | -3.028370 |
| 85 | 1  | 0 | 6.762915  | -0.719791 | -2.376772 |
| 86 | 1  | 0 | 5.928310  | -1.907531 | -3.390219 |
| 87 | 1  | 0 | 5.687144  | -1.927358 | -1.645278 |
| 88 | 1  | 0 | 3.798714  | 0.738245  | 2.324548  |
| 89 | 1  | 0 | 6.305615  | 0.760232  | 2.318773  |
| 90 | 1  | 0 | 5.652271  | 1.444354  | 3.816626  |

|     |    |   |           |           |           |
|-----|----|---|-----------|-----------|-----------|
| 91  | 1  | 0 | 6.285300  | 2.512557  | 2.553597  |
| 92  | 1  | 0 | 2.508775  | 2.916184  | 2.338089  |
| 93  | 1  | 0 | 3.376626  | 2.569851  | 3.843316  |
| 94  | 1  | 0 | 4.009527  | 3.765271  | 2.717622  |
| 95  | 1  | 0 | 2.939827  | -3.561738 | -0.648577 |
| 96  | 1  | 0 | 3.662764  | -5.773810 | 0.264814  |
| 97  | 1  | 0 | 3.427146  | -5.817397 | -1.491588 |
| 98  | 1  | 0 | 2.217132  | -6.528923 | -0.417204 |
| 99  | 1  | 0 | 0.365864  | -4.952229 | -1.551751 |
| 100 | 1  | 0 | 0.717389  | -3.217772 | -1.657940 |
| 101 | 1  | 0 | 1.664856  | -4.373083 | -2.600466 |
| 102 | 1  | 0 | -1.501288 | 0.209970  | -1.016928 |
| 103 | 7  | 0 | -2.176874 | -0.225933 | -1.996505 |
| 104 | 16 | 0 | -3.735091 | 0.370217  | -2.122816 |
| 105 | 16 | 0 | -1.322443 | -0.920010 | -3.255536 |
| 106 | 8  | 0 | -3.840596 | 1.480404  | -1.178279 |
| 107 | 8  | 0 | -4.200126 | 0.484135  | -3.498631 |
| 108 | 8  | 0 | -1.627506 | -0.374129 | -4.569338 |
| 109 | 8  | 0 | 0.050771  | -1.019900 | -2.765696 |
| 110 | 6  | 0 | -4.773687 | -0.990453 | -1.352399 |
| 111 | 6  | 0 | -1.934000 | -2.698998 | -3.303457 |
| 112 | 9  | 0 | -0.996428 | -3.437455 | -3.905746 |
| 113 | 9  | 0 | -2.126775 | -3.165962 | -2.064213 |
| 114 | 9  | 0 | -3.068590 | -2.787669 | -3.992962 |
| 115 | 9  | 0 | -4.264706 | -1.376110 | -0.181135 |
| 116 | 9  | 0 | -4.840464 | -2.045461 | -2.166718 |
| 117 | 9  | 0 | -6.001540 | -0.504496 | -1.160810 |
| 118 | 6  | 0 | -0.151646 | 2.888890  | -1.727021 |
| 119 | 6  | 0 | 1.101661  | 2.640114  | -2.293808 |
| 120 | 6  | 0 | -1.274864 | 3.060407  | -2.546171 |
| 121 | 6  | 0 | 1.224855  | 2.561527  | -3.680743 |
| 122 | 1  | 0 | 1.964253  | 2.527086  | -1.650012 |
| 123 | 6  | 0 | -1.145613 | 2.960676  | -3.931579 |
| 124 | 1  | 0 | -2.243564 | 3.243905  | -2.093699 |
| 125 | 6  | 0 | 0.105503  | 2.716098  | -4.500743 |
| 126 | 1  | 0 | 2.200169  | 2.371970  | -4.119071 |
| 127 | 1  | 0 | -2.023178 | 3.063990  | -4.561736 |
| 128 | 1  | 0 | 0.204155  | 2.636158  | -5.579064 |

Sum of electronic and zero-point Energies= -4609.590233  
Sum of electronic and thermal Energies= -4609.516405  
Sum of electronic and thermal Enthalpies= -4609.515460  
Sum of electronic and thermal Free Energies= -4609.708545

#### B-tsb4

| Center Number | Atomic Number | Atomic Type | Coordinates (Angstroms) |           |           |
|---------------|---------------|-------------|-------------------------|-----------|-----------|
|               |               |             | X                       | Y         | Z         |
| 1             | 6             | 0           | 1.960717                | -0.167411 | -1.245181 |
| 2             | 6             | 0           | 0.859706                | 0.639763  | -1.009535 |
| 3             | 6             | 0           | 2.393124                | -1.245511 | -0.342780 |
| 4             | 7             | 0           | 0.499995                | 1.612892  | -2.035350 |
| 5             | 6             | 0           | 3.493827                | -1.822284 | -0.887141 |
| 6             | 79            | 0           | -0.840291               | -0.417627 | -0.222795 |
| 7             | 6             | 0           | -2.521818               | -1.457370 | 0.341649  |
| 8             | 7             | 0           | -3.822354               | -1.079144 | 0.165913  |
| 9             | 6             | 0           | -4.686441               | -2.009128 | 0.727805  |
| 10            | 6             | 0           | -3.917054               | -2.986740 | 1.266173  |

|    |    |   |           |           |           |
|----|----|---|-----------|-----------|-----------|
| 11 | 7  | 0 | -2.592525 | -2.650278 | 1.004518  |
| 12 | 6  | 0 | -4.252382 | 0.081733  | -0.593253 |
| 13 | 6  | 0 | -1.476430 | -3.461336 | 1.461511  |
| 14 | 6  | 0 | -0.953161 | -3.189859 | 2.745856  |
| 15 | 6  | 0 | 0.068069  | -4.019331 | 3.226200  |
| 16 | 6  | 0 | 0.549074  | -5.078737 | 2.467581  |
| 17 | 6  | 0 | 0.020012  | -5.319526 | 1.203573  |
| 18 | 6  | 0 | -1.000776 | -4.525345 | 0.659147  |
| 19 | 6  | 0 | -4.563943 | 1.286981  | 0.068177  |
| 20 | 6  | 0 | -4.891883 | 2.384128  | -0.744387 |
| 21 | 6  | 0 | -4.936203 | 2.287447  | -2.128986 |
| 22 | 6  | 0 | -4.684540 | 1.066893  | -2.747389 |
| 23 | 6  | 0 | -4.347382 | -0.063922 | -1.998113 |
| 24 | 7  | 0 | 2.816596  | -0.099403 | -2.335128 |
| 25 | 6  | 0 | 3.705178  | -1.066925 | -2.163176 |
| 26 | 7  | 0 | 4.713367  | -1.270380 | -3.055362 |
| 27 | 6  | 0 | 4.883906  | -0.305859 | -4.136076 |
| 28 | 6  | 0 | 5.240706  | -2.600202 | -3.352269 |
| 29 | 6  | 0 | -1.448855 | -4.891748 | -0.761833 |
| 30 | 6  | 0 | -2.953343 | -5.158431 | -0.953718 |
| 31 | 6  | 0 | -0.903134 | -3.917330 | -1.824202 |
| 32 | 6  | 0 | -4.197492 | -1.416522 | -2.692814 |
| 33 | 6  | 0 | -5.584192 | -2.079811 | -2.848695 |
| 34 | 6  | 0 | -3.483059 | -1.344854 | -4.052279 |
| 35 | 6  | 0 | -4.701509 | 1.522318  | 1.577419  |
| 36 | 6  | 0 | -6.169212 | 1.297257  | 2.006295  |
| 37 | 6  | 0 | -3.748710 | 0.790161  | 2.530913  |
| 38 | 6  | 0 | -1.474847 | -2.061894 | 3.630918  |
| 39 | 6  | 0 | -2.487505 | -2.599829 | 4.663954  |
| 40 | 6  | 0 | -0.346517 | -1.285317 | 4.334780  |
| 41 | 6  | 0 | 4.355003  | -2.826870 | -0.233660 |
| 42 | 6  | 0 | 5.748178  | -2.646995 | -0.146471 |
| 43 | 6  | 0 | 6.544269  | -3.566694 | 0.533356  |
| 44 | 6  | 0 | 5.966912  | -4.684438 | 1.140422  |
| 45 | 6  | 0 | 4.585700  | -4.871459 | 1.064831  |
| 46 | 6  | 0 | 3.786106  | -3.953174 | 0.384912  |
| 47 | 6  | 0 | 1.283364  | 1.481804  | -4.710518 |
| 48 | 16 | 0 | -0.054098 | 1.107269  | -3.560518 |
| 49 | 8  | 0 | -1.192089 | 1.950692  | -3.947556 |
| 50 | 8  | 0 | -0.224676 | -0.350089 | -3.498348 |
| 51 | 1  | 0 | 1.962765  | -1.451709 | 0.626288  |
| 52 | 1  | 0 | -5.756290 | -1.887556 | 0.689944  |
| 53 | 1  | 0 | -4.179666 | -3.892620 | 1.786774  |
| 54 | 1  | 0 | 0.487030  | -3.827784 | 4.207939  |
| 55 | 1  | 0 | 1.334898  | -5.717932 | 2.860124  |
| 56 | 1  | 0 | 0.401153  | -6.148773 | 0.613923  |
| 57 | 1  | 0 | -5.114919 | 3.333312  | -0.264879 |
| 58 | 1  | 0 | -5.176882 | 3.160727  | -2.728246 |
| 59 | 1  | 0 | -4.739557 | 0.993410  | -3.827259 |
| 60 | 1  | 0 | 4.692829  | 0.699605  | -3.763794 |
| 61 | 1  | 0 | 5.912163  | -0.372610 | -4.503903 |
| 62 | 1  | 0 | 4.199405  | -0.506144 | -4.972253 |
| 63 | 1  | 0 | 6.332882  | -2.569869 | -3.427305 |
| 64 | 1  | 0 | 4.964165  | -3.311409 | -2.579309 |
| 65 | 1  | 0 | 4.838137  | -2.953958 | -4.311867 |
| 66 | 1  | 0 | -0.959262 | -5.854457 | -0.954272 |
| 67 | 1  | 0 | -3.345141 | -5.826254 | -0.178831 |
| 68 | 1  | 0 | -3.111074 | -5.646235 | -1.921606 |
| 69 | 1  | 0 | -3.550244 | -4.244721 | -0.950390 |

|     |    |   |           |           |           |
|-----|----|---|-----------|-----------|-----------|
| 70  | 1  | 0 | 0.183791  | -3.819620 | -1.747282 |
| 71  | 1  | 0 | -1.139559 | -4.287668 | -2.827952 |
| 72  | 1  | 0 | -1.324422 | -2.914437 | -1.727888 |
| 73  | 1  | 0 | -3.592500 | -2.063952 | -2.052927 |
| 74  | 1  | 0 | -6.091863 | -2.203800 | -1.886676 |
| 75  | 1  | 0 | -5.485927 | -3.069333 | -3.308594 |
| 76  | 1  | 0 | -6.232747 | -1.472913 | -3.490079 |
| 77  | 1  | 0 | -2.506856 | -0.864108 | -3.968357 |
| 78  | 1  | 0 | -3.333221 | -2.359715 | -4.437061 |
| 79  | 1  | 0 | -4.076638 | -0.805535 | -4.798412 |
| 80  | 1  | 0 | -4.494283 | 2.591048  | 1.707308  |
| 81  | 1  | 0 | -6.863487 | 1.880769  | 1.394120  |
| 82  | 1  | 0 | -6.307966 | 1.587984  | 3.053340  |
| 83  | 1  | 0 | -6.449848 | 0.241365  | 1.916845  |
| 84  | 1  | 0 | -2.712754 | 0.867643  | 2.202633  |
| 85  | 1  | 0 | -3.812411 | 1.254143  | 3.520540  |
| 86  | 1  | 0 | -4.012823 | -0.263724 | 2.651894  |
| 87  | 1  | 0 | -1.998673 | -1.348530 | 2.993004  |
| 88  | 1  | 0 | -3.341056 | -3.090827 | 4.185238  |
| 89  | 1  | 0 | -2.872350 | -1.779841 | 5.279208  |
| 90  | 1  | 0 | -2.014220 | -3.328362 | 5.331847  |
| 91  | 1  | 0 | 0.441236  | -0.992080 | 3.636724  |
| 92  | 1  | 0 | -0.749190 | -0.372731 | 4.782867  |
| 93  | 1  | 0 | 0.113936  | -1.871559 | 5.137933  |
| 94  | 1  | 0 | 6.200659  | -1.770910 | -0.601680 |
| 95  | 1  | 0 | 7.616702  | -3.405347 | 0.597302  |
| 96  | 1  | 0 | 6.588377  | -5.400838 | 1.669741  |
| 97  | 1  | 0 | 4.127644  | -5.737349 | 1.534835  |
| 98  | 1  | 0 | 2.712532  | -4.104492 | 0.327317  |
| 99  | 1  | 0 | 2.153100  | 0.919742  | -4.374792 |
| 100 | 1  | 0 | 0.940259  | 1.172663  | -5.699516 |
| 101 | 1  | 0 | 1.464576  | 2.556977  | -4.688208 |
| 102 | 1  | 0 | 0.925421  | 1.264703  | 0.361117  |
| 103 | 7  | 0 | 1.120919  | 1.925075  | 1.437648  |
| 104 | 16 | 0 | 2.394865  | 1.527090  | 2.441396  |
| 105 | 16 | 0 | -0.231207 | 2.700525  | 2.056546  |
| 106 | 6  | 0 | 3.846322  | 2.203734  | 1.468465  |
| 107 | 6  | 0 | 0.305116  | 4.495701  | 2.342340  |
| 108 | 8  | 0 | 2.599094  | 0.079303  | 2.461637  |
| 109 | 8  | 0 | 2.358032  | 2.310042  | 3.672863  |
| 110 | 8  | 0 | -1.184252 | 2.746869  | 0.949725  |
| 111 | 8  | 0 | -0.631914 | 2.194189  | 3.366081  |
| 112 | 9  | 0 | 4.950612  | 1.974231  | 2.182116  |
| 113 | 9  | 0 | 3.956537  | 1.586525  | 0.286172  |
| 114 | 9  | 0 | 3.712675  | 3.513740  | 1.270308  |
| 115 | 9  | 0 | -0.764116 | 5.262559  | 2.111764  |
| 116 | 9  | 0 | 1.282308  | 4.833468  | 1.502993  |
| 117 | 9  | 0 | 0.708208  | 4.669891  | 3.594358  |
| 118 | 6  | 0 | 0.752931  | 3.016866  | -1.866802 |
| 119 | 6  | 0 | -0.294355 | 3.947071  | -1.895665 |
| 120 | 6  | 0 | 2.074257  | 3.458052  | -1.704362 |
| 121 | 6  | 0 | -0.011914 | 5.307782  | -1.776348 |
| 122 | 1  | 0 | -1.310498 | 3.593735  | -2.012260 |
| 123 | 6  | 0 | 2.344445  | 4.818967  | -1.566003 |
| 124 | 1  | 0 | 2.874990  | 2.727324  | -1.690795 |
| 125 | 6  | 0 | 1.302975  | 5.748005  | -1.610023 |
| 126 | 1  | 0 | -0.826678 | 6.025754  | -1.800451 |
| 127 | 1  | 0 | 3.369303  | 5.152400  | -1.429668 |
| 128 | 1  | 0 | 1.514047  | 6.808764  | -1.508154 |

Sum of electronic and zero-point Energies= -4609.558049  
 Sum of electronic and thermal Energies= -4609.484033  
 Sum of electronic and thermal Enthalpies= -4609.483089  
 Sum of electronic and thermal Free Energies= -4609.676227

C-tsai

| Center Number | Atomic Number | Atomic Type | Coordinates (Angstroms) |           |           |
|---------------|---------------|-------------|-------------------------|-----------|-----------|
|               |               |             | X                       | Y         | Z         |
| 1             | 6             | 0           | -1.741282               | 0.567612  | -0.372629 |
| 2             | 6             | 0           | -1.935943               | 1.870277  | -0.408520 |
| 3             | 6             | 0           | -2.727712               | -0.498378 | -0.487179 |
| 4             | 7             | 0           | -1.289584               | 3.020397  | -0.599924 |
| 5             | 6             | 0           | -3.731158               | -0.536826 | -1.397840 |
| 6             | 79            | 0           | 0.252440                | -0.039195 | -0.110681 |
| 7             | 6             | 0           | 2.162903                | -0.773075 | 0.108349  |
| 8             | 7             | 0           | 3.310807                | -0.338936 | -0.486595 |
| 9             | 6             | 0           | 4.388262                | -1.130057 | -0.102582 |
| 10            | 6             | 0           | 3.901190                | -2.084666 | 0.727542  |
| 11            | 7             | 0           | 2.537857                | -1.846616 | 0.860450  |
| 12            | 6             | 0           | 3.447347                | 0.872933  | -1.276893 |
| 13            | 6             | 0           | 1.636563                | -2.728684 | 1.582185  |
| 14            | 6             | 0           | 1.376149                | -2.515975 | 2.956064  |
| 15            | 6             | 0           | 0.505451                | -3.422258 | 3.578310  |
| 16            | 6             | 0           | -0.071091               | -4.485652 | 2.890019  |
| 17            | 6             | 0           | 0.220526                | -4.676999 | 1.545367  |
| 18            | 6             | 0           | 1.081356                | -3.808656 | 0.861700  |
| 19            | 6             | 0           | 3.734872                | 2.065197  | -0.575046 |
| 20            | 6             | 0           | 3.869538                | 3.244238  | -1.319441 |
| 21            | 6             | 0           | 3.734584                | 3.238322  | -2.702534 |
| 22            | 6             | 0           | 3.479944                | 2.043124  | -3.368670 |
| 23            | 6             | 0           | 3.336918                | 0.825775  | -2.686152 |
| 24            | 7             | 0           | -3.778206               | 2.357085  | -0.382455 |
| 25            | 6             | 0           | -4.508947               | 2.135773  | 0.518947  |
| 26            | 7             | 0           | -5.322905               | 1.912647  | 1.506344  |
| 27            | 6             | 0           | -5.174368               | 2.654168  | 2.772632  |
| 28            | 6             | 0           | -6.414969               | 0.933062  | 1.375391  |
| 29            | 6             | 0           | 1.938022                | -1.396410 | 3.841267  |
| 30            | 6             | 0           | 3.474897                | -1.318299 | 3.913479  |
| 31            | 6             | 0           | 1.313282                | -0.017677 | 3.552974  |
| 32            | 6             | 0           | 1.396647                | -4.089063 | -0.605994 |
| 33            | 6             | 0           | 2.191469                | -5.401798 | -0.760340 |
| 34            | 6             | 0           | 0.123284                | -4.107874 | -1.473116 |
| 35            | 6             | 0           | -0.652502               | 3.360754  | -1.887670 |
| 36            | 6             | 0           | -2.354431               | 5.497282  | 0.031893  |
| 37            | 16            | 0           | -1.268785               | 4.211060  | 0.673640  |
| 38            | 8             | 0           | 0.088056                | 4.748167  | 0.740759  |
| 39            | 8             | 0           | -1.909685               | 3.576627  | 1.825590  |
| 40            | 6             | 0           | 3.091518                | -0.414037 | -3.556207 |
| 41            | 6             | 0           | 4.099246                | -1.563610 | -3.366011 |
| 42            | 6             | 0           | 1.639020                | -0.924552 | -3.507678 |
| 43            | 6             | 0           | 3.968206                | 2.106445  | 0.933871  |
| 44            | 6             | 0           | 5.478283                | 2.200009  | 1.241183  |
| 45            | 6             | 0           | 3.201630                | 3.245904  | 1.628998  |
| 46            | 1             | 0           | -2.571355               | -1.354057 | 0.166994  |
| 47            | 1             | 0           | -3.833507               | 0.290482  | -2.097221 |
| 48            | 1             | 0           | 5.387382                | -0.942380 | -0.459612 |

|     |    |   |           |           |           |
|-----|----|---|-----------|-----------|-----------|
| 49  | 1  | 0 | 4.388895  | -2.899234 | 1.237285  |
| 50  | 1  | 0 | 0.284055  | -3.288204 | 4.633169  |
| 51  | 1  | 0 | -0.736168 | -5.170654 | 3.407541  |
| 52  | 1  | 0 | -0.217317 | -5.516772 | 1.015237  |
| 53  | 1  | 0 | 4.091610  | 4.173530  | -0.805778 |
| 54  | 1  | 0 | 3.848341  | 4.160034  | -3.265769 |
| 55  | 1  | 0 | 3.402243  | 2.043046  | -4.452179 |
| 56  | 1  | 0 | -4.238840 | 3.213758  | 2.753508  |
| 57  | 1  | 0 | -6.021036 | 3.333948  | 2.909719  |
| 58  | 1  | 0 | -5.146863 | 1.938301  | 3.598875  |
| 59  | 1  | 0 | -6.335963 | 0.422229  | 0.415612  |
| 60  | 1  | 0 | -6.336394 | 0.197559  | 2.180784  |
| 61  | 1  | 0 | -7.380812 | 1.443198  | 1.441631  |
| 62  | 1  | 0 | 1.612317  | -1.667924 | 4.852362  |
| 63  | 1  | 0 | 3.918212  | -2.303950 | 4.088999  |
| 64  | 1  | 0 | 3.766118  | -0.672058 | 4.747870  |
| 65  | 1  | 0 | 3.919087  | -0.898352 | 3.008135  |
| 66  | 1  | 0 | 0.220329  | -0.065246 | 3.579653  |
| 67  | 1  | 0 | 1.638828  | 0.703847  | 4.310159  |
| 68  | 1  | 0 | 1.603441  | 0.370437  | 2.573708  |
| 69  | 1  | 0 | 2.029214  | -3.282846 | -0.986052 |
| 70  | 1  | 0 | 3.118921  | -5.380987 | -0.179243 |
| 71  | 1  | 0 | 2.453148  | -5.566914 | -1.810540 |
| 72  | 1  | 0 | 1.608261  | -6.264811 | -0.423102 |
| 73  | 1  | 0 | -0.426081 | -3.164761 | -1.391995 |
| 74  | 1  | 0 | 0.385914  | -4.260017 | -2.525063 |
| 75  | 1  | 0 | -0.553138 | -4.918175 | -1.182936 |
| 76  | 1  | 0 | -1.399295 | 3.676910  | -2.622905 |
| 77  | 1  | 0 | -0.121756 | 2.478675  | -2.249868 |
| 78  | 1  | 0 | 0.075273  | 4.155649  | -1.718923 |
| 79  | 1  | 0 | -2.413188 | 6.267526  | 0.803523  |
| 80  | 1  | 0 | -1.915732 | 5.912210  | -0.876231 |
| 81  | 1  | 0 | -3.332534 | 5.058997  | -0.165595 |
| 82  | 1  | 0 | 3.249131  | -0.055098 | -4.580141 |
| 83  | 1  | 0 | 5.130608  | -1.196326 | -3.368137 |
| 84  | 1  | 0 | 3.999985  | -2.273273 | -4.193755 |
| 85  | 1  | 0 | 3.934727  | -2.119962 | -2.440396 |
| 86  | 1  | 0 | 1.497424  | -1.714523 | -4.253331 |
| 87  | 1  | 0 | 1.378486  | -1.334241 | -2.528913 |
| 88  | 1  | 0 | 0.930059  | -0.120975 | -3.730926 |
| 89  | 1  | 0 | 3.604640  | 1.169670  | 1.364086  |
| 90  | 1  | 0 | 6.036024  | 1.364960  | 0.805378  |
| 91  | 1  | 0 | 5.648283  | 2.192163  | 2.322747  |
| 92  | 1  | 0 | 5.903056  | 3.126876  | 0.841610  |
| 93  | 1  | 0 | 2.134691  | 3.226992  | 1.393977  |
| 94  | 1  | 0 | 3.315909  | 3.158765  | 2.714316  |
| 95  | 1  | 0 | 3.585866  | 4.230637  | 1.344179  |
| 96  | 6  | 0 | -4.709423 | -1.586371 | -1.570030 |
| 97  | 6  | 0 | -5.717673 | -1.614521 | -2.516087 |
| 98  | 16 | 0 | -4.789178 | -3.024291 | -0.563342 |
| 99  | 6  | 0 | -6.542934 | -2.769687 | -2.439528 |
| 100 | 1  | 0 | -5.848524 | -0.825001 | -3.248447 |
| 101 | 6  | 0 | -6.164542 | -3.620026 | -1.435320 |
| 102 | 1  | 0 | -7.377647 | -2.963953 | -3.102617 |
| 103 | 1  | 0 | -6.607208 | -4.566344 | -1.156116 |

---

Sum of electronic and zero-point Energies= -2911.392540

Sum of electronic and thermal Energies= -2911.335501

Sum of electronic and thermal Enthalpies= -2911.334557

Sum of electronic and thermal Free Energies= -2911.493796

C-tsb1

| Center<br>Number | Atomic<br>Number | Atomic<br>Type | Coordinates (Angstroms) |           |           |
|------------------|------------------|----------------|-------------------------|-----------|-----------|
|                  |                  |                | X                       | Y         | Z         |
| 1                | 6                | 0              | 2.359044                | -0.612074 | -1.135374 |
| 2                | 6                | 0              | 1.397847                | -1.437256 | -0.823675 |
| 3                | 6                | 0              | 2.875837                | 0.707974  | -1.172102 |
| 4                | 7                | 0              | 1.478281                | -2.853584 | -0.802590 |
| 5                | 6                | 0              | 3.156733                | 1.409567  | -0.038244 |
| 6                | 79               | 0              | -0.380381               | -0.432284 | -0.297021 |
| 7                | 6                | 0              | -2.188160               | 0.404490  | 0.241850  |
| 8                | 7                | 0              | -2.680484               | 0.582570  | 1.501889  |
| 9                | 6                | 0              | -3.947784               | 1.151979  | 1.455531  |
| 10               | 6                | 0              | -4.261131               | 1.311518  | 0.146355  |
| 11               | 7                | 0              | -3.170347               | 0.860677  | -0.588394 |
| 12               | 6                | 0              | -1.943035               | 0.379216  | 2.738087  |
| 13               | 6                | 0              | -3.177993               | 0.753498  | -2.037936 |
| 14               | 6                | 0              | -2.703064               | 1.818658  | -2.837450 |
| 15               | 6                | 0              | -2.754802               | 1.634501  | -4.226760 |
| 16               | 6                | 0              | -3.262356               | 0.472731  | -4.800045 |
| 17               | 6                | 0              | -3.749939               | -0.542385 | -3.986477 |
| 18               | 6                | 0              | -3.722703               | -0.426570 | -2.590917 |
| 19               | 6                | 0              | -1.187623               | 1.471842  | 3.217432  |
| 20               | 6                | 0              | -0.467323               | 1.298063  | 4.405787  |
| 21               | 6                | 0              | -0.500109               | 0.091362  | 5.093531  |
| 22               | 6                | 0              | -1.279102               | -0.956647 | 4.613589  |
| 23               | 6                | 0              | -2.031570               | -0.848101 | 3.435002  |
| 24               | 7                | 0              | 3.922057                | -1.708401 | -1.796696 |
| 25               | 6                | 0              | 5.005388                | -1.541746 | -1.360350 |
| 26               | 7                | 0              | 6.194437                | -1.366092 | -0.852230 |
| 27               | 6                | 0              | 6.568183                | -2.044853 | 0.401146  |
| 28               | 6                | 0              | 7.229725                | -0.629722 | -1.591253 |
| 29               | 6                | 0              | -2.145637               | 3.161934  | -2.350619 |
| 30               | 6                | 0              | -3.096783               | 3.981151  | -1.457454 |
| 31               | 6                | 0              | -0.738311               | 3.058169  | -1.733790 |
| 32               | 6                | 0              | -4.327234               | -1.543763 | -1.742841 |
| 33               | 6                | 0              | -5.866714               | -1.535355 | -1.848027 |
| 34               | 6                | 0              | -3.764104               | -2.930058 | -2.106158 |
| 35               | 6                | 0              | -2.878961               | -2.069341 | 3.056454  |
| 36               | 6                | 0              | -4.389457               | -1.795384 | 2.923011  |
| 37               | 6                | 0              | -2.337059               | -2.855213 | 1.848424  |
| 38               | 6                | 0              | -1.165278               | 2.837024  | 2.532930  |
| 39               | 6                | 0              | 0.265626                | 3.307915  | 2.217072  |
| 40               | 6                | 0              | -1.916527               | 3.885852  | 3.378818  |
| 41               | 6                | 0              | 0.251966                | -3.576331 | -1.191853 |
| 42               | 6                | 0              | 3.170742                | -4.914554 | -0.227883 |
| 43               | 16               | 0              | 2.281434                | -3.557217 | 0.554548  |
| 44               | 8                | 0              | 1.290353                | -4.127432 | 1.472631  |
| 45               | 8                | 0              | 3.268769                | -2.587518 | 1.046150  |
| 46               | 1                | 0              | 3.098599                | 1.128340  | -2.152186 |
| 47               | 1                | 0              | 2.952284                | 0.931759  | 0.918145  |
| 48               | 1                | 0              | -4.500336               | 1.382719  | 2.351406  |
| 49               | 1                | 0              | -5.144373               | 1.704122  | -0.329997 |
| 50               | 1                | 0              | -2.394850               | 2.432089  | -4.870169 |
| 51               | 1                | 0              | -3.291519               | 0.368112  | -5.880488 |
| 52               | 1                | 0              | -4.167224               | -1.436619 | -4.437797 |



|     |    |   |           |           |           |
|-----|----|---|-----------|-----------|-----------|
| 53  | 1  | 0 | 0.116903  | 2.123928  | 4.799279  |
| 54  | 1  | 0 | 0.065027  | -0.029614 | 6.012842  |
| 55  | 1  | 0 | -1.316580 | -1.889156 | 5.168702  |
| 56  | 1  | 0 | 5.667712  | -2.428916 | 0.881323  |
| 57  | 1  | 0 | 7.268028  | -2.861745 | 0.194928  |
| 58  | 1  | 0 | 7.049268  | -1.319265 | 1.063064  |
| 59  | 1  | 0 | 6.789855  | -0.164320 | -2.473345 |
| 60  | 1  | 0 | 7.652019  | 0.146492  | -0.946570 |
| 61  | 1  | 0 | 8.027220  | -1.312003 | -1.903397 |
| 62  | 1  | 0 | -2.028101 | 3.750015  | -3.268422 |
| 63  | 1  | 0 | -2.721202 | 5.005897  | -1.369542 |
| 64  | 1  | 0 | -3.177547 | 3.576865  | -0.445698 |
| 65  | 1  | 0 | -4.102257 | 4.033731  | -1.887389 |
| 66  | 1  | 0 | -0.744784 | 2.520276  | -0.782976 |
| 67  | 1  | 0 | -0.051546 | 2.535402  | -2.406473 |
| 68  | 1  | 0 | -0.337461 | 4.061399  | -1.551423 |
| 69  | 1  | 0 | -4.070544 | -1.362141 | -0.696022 |
| 70  | 1  | 0 | -6.287360 | -0.572589 | -1.541069 |
| 71  | 1  | 0 | -6.298003 | -2.312159 | -1.208260 |
| 72  | 1  | 0 | -6.193595 | -1.727058 | -2.875331 |
| 73  | 1  | 0 | -2.672447 | -2.944683 | -2.039741 |
| 74  | 1  | 0 | -4.158630 | -3.685838 | -1.419487 |
| 75  | 1  | 0 | -4.044031 | -3.233374 | -3.119863 |
| 76  | 1  | 0 | -2.778025 | -2.739900 | 3.917656  |
| 77  | 1  | 0 | -4.767697 | -1.211866 | 3.768806  |
| 78  | 1  | 0 | -4.931275 | -2.746668 | 2.909555  |
| 79  | 1  | 0 | -4.641239 | -1.266313 | 2.000582  |
| 80  | 1  | 0 | -2.906800 | -3.783641 | 1.728808  |
| 81  | 1  | 0 | -2.428272 | -2.285102 | 0.919886  |
| 82  | 1  | 0 | -1.284388 | -3.119751 | 1.984459  |
| 83  | 1  | 0 | -1.689097 | 2.756496  | 1.577152  |
| 84  | 1  | 0 | 0.792267  | 2.580357  | 1.592969  |
| 85  | 1  | 0 | 0.239593  | 4.260746  | 1.678574  |
| 86  | 1  | 0 | 0.852546  | 3.462686  | 3.128434  |
| 87  | 1  | 0 | -2.950652 | 3.582309  | 3.569926  |
| 88  | 1  | 0 | -1.937016 | 4.850843  | 2.861794  |
| 89  | 1  | 0 | -1.431586 | 4.035975  | 4.348958  |
| 90  | 1  | 0 | 0.469047  | -4.642827 | -1.277718 |
| 91  | 1  | 0 | -0.044208 | -3.211596 | -2.176333 |
| 92  | 1  | 0 | -0.565849 | -3.435539 | -0.479409 |
| 93  | 1  | 0 | 3.829799  | -4.497987 | -0.988635 |
| 94  | 1  | 0 | 3.734214  | -5.410697 | 0.564766  |
| 95  | 1  | 0 | 2.459667  | -5.614039 | -0.667013 |
| 96  | 6  | 0 | 3.703016  | 2.734370  | 0.042890  |
| 97  | 6  | 0 | 4.011541  | 3.416813  | 1.209571  |
| 98  | 16 | 0 | 4.099245  | 3.718396  | -1.357161 |
| 99  | 6  | 0 | 4.560025  | 4.704113  | 0.986070  |
| 100 | 1  | 0 | 3.845091  | 2.989017  | 2.192102  |
| 101 | 6  | 0 | 4.667141  | 5.002925  | -0.349433 |
| 102 | 1  | 0 | 4.862589  | 5.382599  | 1.774551  |
| 103 | 1  | 0 | 5.045085  | 5.910321  | -0.800952 |

---

Sum of electronic and zero-point Energies= -2911.379138  
Sum of electronic and thermal Energies= -2911.322300  
Sum of electronic and thermal Enthalpies= -2911.321356  
Sum of electronic and thermal Free Energies= -2911.479140

C-a1

---

| Center<br>Number | Atomic<br>Number | Atomic<br>Type | Coordinates (Angstroms) |           |           |
|------------------|------------------|----------------|-------------------------|-----------|-----------|
|                  |                  |                | X                       | Y         | Z         |
| 1                | 6                | 0              | 1.983324                | -0.019835 | -0.371447 |
| 2                | 6                | 0              | 2.754375                | -1.172986 | -0.434748 |
| 3                | 6                | 0              | 2.688035                | 1.235688  | -0.477242 |
| 4                | 7                | 0              | 2.300408                | -2.530574 | -0.470424 |
| 5                | 6                | 0              | 2.124870                | 2.463286  | -0.291478 |
| 6                | 79               | 0              | -0.083229               | -0.008503 | -0.142400 |
| 7                | 6                | 0              | -2.149431               | 0.134773  | 0.028023  |
| 8                | 7                | 0              | -3.113938               | -0.724687 | -0.418363 |
| 9                | 6                | 0              | -4.383451               | -0.223055 | -0.152211 |
| 10               | 6                | 0              | -4.214464               | 0.974767  | 0.456556  |
| 11               | 7                | 0              | -2.843768               | 1.177577  | 0.571474  |
| 12               | 6                | 0              | -2.892065               | -2.057574 | -0.951708 |
| 13               | 6                | 0              | -2.279820               | 2.422697  | 1.061066  |
| 14               | 6                | 0              | -1.956182               | 2.572260  | 2.430068  |
| 15               | 6                | 0              | -1.459113               | 3.822660  | 2.825787  |
| 16               | 6                | 0              | -1.311172               | 4.877112  | 1.929408  |
| 17               | 6                | 0              | -1.659365               | 4.703754  | 0.594773  |
| 18               | 6                | 0              | -2.148293               | 3.475600  | 0.128865  |
| 19               | 6                | 0              | -2.906444               | -3.127722 | -0.027118 |
| 20               | 6                | 0              | -2.689436               | -4.419589 | -0.523223 |
| 21               | 6                | 0              | -2.482152               | -4.642616 | -1.879386 |
| 22               | 6                | 0              | -2.516286               | -3.574102 | -2.770414 |
| 23               | 6                | 0              | -2.734445               | -2.255328 | -2.343432 |
| 24               | 7                | 0              | 4.129783                | -1.076372 | -0.431353 |
| 25               | 6                | 0              | 5.218059                | -1.545344 | -0.391949 |
| 26               | 7                | 0              | 6.394872                | -1.956831 | -0.062020 |
| 27               | 6                | 0              | 6.745117                | -2.147065 | 1.367637  |
| 28               | 6                | 0              | 7.444594                | -2.202840 | -1.068556 |
| 29               | 6                | 0              | -2.110557               | 1.518951  | 3.534433  |
| 30               | 6                | 0              | -3.547025               | 0.996933  | 3.731989  |
| 31               | 6                | 0              | -1.094756               | 0.364329  | 3.446253  |
| 32               | 6                | 0              | -2.556074               | 3.351091  | -1.338196 |
| 33               | 6                | 0              | -3.811788               | 4.197009  | -1.633943 |
| 34               | 6                | 0              | -1.407347               | 3.720338  | -2.295934 |
| 35               | 6                | 0              | 1.173737                | -2.876590 | -1.356343 |
| 36               | 6                | 0              | 2.639414                | -5.028584 | 0.618545  |
| 37               | 16               | 0              | 2.303986                | -3.313837 | 1.062666  |
| 38               | 8                | 0              | 0.985603                | -3.270342 | 1.701688  |
| 39               | 8                | 0              | 3.480422                | -2.790705 | 1.771362  |
| 40               | 6                | 0              | -2.816334               | -1.191139 | -3.446818 |
| 41               | 6                | 0              | -4.117965               | -0.366879 | -3.459375 |
| 42               | 6                | 0              | -1.575453               | -0.284236 | -3.542481 |
| 43               | 6                | 0              | -3.232365               | -2.940698 | 1.454367  |
| 44               | 6                | 0              | -4.710020               | -3.302717 | 1.722450  |
| 45               | 6                | 0              | -2.310660               | -3.741807 | 2.390853  |
| 46               | 1                | 0              | 3.755700                | 1.204341  | -0.696853 |
| 47               | 1                | 0              | 1.063069                | 2.520007  | -0.058734 |
| 48               | 1                | 0              | -5.276282               | -0.759878 | -0.426310 |
| 49               | 1                | 0              | -4.928879               | 1.694211  | 0.821501  |
| 50               | 1                | 0              | -1.198835               | 3.971331  | 3.869572  |
| 51               | 1                | 0              | -0.940760               | 5.836796  | 2.277906  |
| 52               | 1                | 0              | -1.568069               | 5.535207  | -0.097322 |
| 53               | 1                | 0              | -2.696076               | -5.258972 | 0.163720  |
| 54               | 1                | 0              | -2.321730               | -5.651645 | -2.248304 |
| 55               | 1                | 0              | -2.390838               | -3.761927 | -3.832986 |
| 56               | 1                | 0              | 5.831136                | -2.135328 | 1.959943  |

|     |    |   |           |           |           |
|-----|----|---|-----------|-----------|-----------|
| 57  | 1  | 0 | 7.236532  | -3.117273 | 1.476850  |
| 58  | 1  | 0 | 7.426313  | -1.353284 | 1.687162  |
| 59  | 1  | 0 | 7.043732  | -2.021846 | -2.065583 |
| 60  | 1  | 0 | 8.287886  | -1.530045 | -0.887937 |
| 61  | 1  | 0 | 7.786012  | -3.238867 | -0.992996 |
| 62  | 1  | 0 | -1.867556 | 2.062070  | 4.455347  |
| 63  | 1  | 0 | -4.268960 | 1.818726  | 3.781146  |
| 64  | 1  | 0 | -3.606472 | 0.447289  | 4.676928  |
| 65  | 1  | 0 | -3.858821 | 0.313515  | 2.938620  |
| 66  | 1  | 0 | -0.070864 | 0.740715  | 3.362587  |
| 67  | 1  | 0 | -1.155121 | -0.249451 | 4.351403  |
| 68  | 1  | 0 | -1.278380 | -0.287271 | 2.589065  |
| 69  | 1  | 0 | -2.812095 | 2.307813  | -1.538595 |
| 70  | 1  | 0 | -4.650675 | 3.911969  | -0.991192 |
| 71  | 1  | 0 | -4.123334 | 4.065513  | -2.675226 |
| 72  | 1  | 0 | -3.620274 | 5.263323  | -1.475211 |
| 73  | 1  | 0 | -0.520925 | 3.105344  | -2.113878 |
| 74  | 1  | 0 | -1.720192 | 3.564659  | -3.333413 |
| 75  | 1  | 0 | -1.115510 | 4.770950  | -2.197978 |
| 76  | 1  | 0 | 1.330810  | -2.354744 | -2.301219 |
| 77  | 1  | 0 | 0.200097  | -2.593521 | -0.947596 |
| 78  | 1  | 0 | 1.184231  | -3.951173 | -1.556194 |
| 79  | 1  | 0 | 2.739665  | -5.562446 | 1.565414  |
| 80  | 1  | 0 | 1.804359  | -5.439038 | 0.051683  |
| 81  | 1  | 0 | 3.567714  | -5.074596 | 0.049749  |
| 82  | 1  | 0 | -2.832385 | -1.774153 | -4.375346 |
| 83  | 1  | 0 | -4.999482 | -1.009860 | -3.369518 |
| 84  | 1  | 0 | -4.197214 | 0.171591  | -4.409358 |
| 85  | 1  | 0 | -4.153382 | 0.376888  | -2.660062 |
| 86  | 1  | 0 | -1.647048 | 0.347879  | -4.434410 |
| 87  | 1  | 0 | -1.471727 | 0.368634  | -2.672668 |
| 88  | 1  | 0 | -0.658118 | -0.875537 | -3.623606 |
| 89  | 1  | 0 | -3.098380 | -1.884623 | 1.704327  |
| 90  | 1  | 0 | -5.398704 | -2.711293 | 1.111465  |
| 91  | 1  | 0 | -4.958763 | -3.129555 | 2.774487  |
| 92  | 1  | 0 | -4.897347 | -4.359163 | 1.502826  |
| 93  | 1  | 0 | -1.256435 | -3.528691 | 2.205792  |
| 94  | 1  | 0 | -2.536033 | -3.484447 | 3.430878  |
| 95  | 1  | 0 | -2.467201 | -4.821249 | 2.290390  |
| 96  | 6  | 0 | 2.801597  | 3.728553  | -0.355024 |
| 97  | 6  | 0 | 2.236290  | 4.971315  | -0.120323 |
| 98  | 16 | 0 | 4.504752  | 3.909039  | -0.754278 |
| 99  | 6  | 0 | 3.148496  | 6.048257  | -0.256853 |
| 100 | 1  | 0 | 1.192534  | 5.084315  | 0.149718  |
| 101 | 6  | 0 | 4.409696  | 5.629136  | -0.596695 |
| 102 | 1  | 0 | 2.887262  | 7.089681  | -0.111041 |
| 103 | 1  | 0 | 5.290551  | 6.233345  | -0.766211 |

Sum of electronic and zero-point Energies= -2911.414820  
Sum of electronic and thermal Energies= -2911.358374  
Sum of electronic and thermal Enthalpies= -2911.357429  
Sum of electronic and thermal Free Energies= -2911.513473

### C-b1

| Center<br>Number | Atomic<br>Number | Atomic<br>Type | Coordinates (Angstroms) |           |           |
|------------------|------------------|----------------|-------------------------|-----------|-----------|
|                  |                  |                | X                       | Y         | Z         |
| 1                | 6                | 0              | 2.717325                | -0.397439 | -0.720190 |

|    |    |   |            |            |            |
|----|----|---|------------|------------|------------|
| 2  | 6  | 0 | 1. 554834  | -1. 144970 | -0. 759285 |
| 3  | 6  | 0 | 2. 786985  | 1. 030824  | -0. 430783 |
| 4  | 7  | 0 | 1. 687725  | -2. 542825 | -1. 038455 |
| 5  | 6  | 0 | 3. 919917  | 1. 749311  | -0. 261653 |
| 6  | 79 | 0 | -0. 318354 | -0. 379225 | -0. 310994 |
| 7  | 6  | 0 | -2. 204055 | 0. 287878  | 0. 247834  |
| 8  | 7  | 0 | -2. 737900 | 0. 250742  | 1. 503319  |
| 9  | 6  | 0 | -4. 021958 | 0. 782474  | 1. 506764  |
| 10 | 6  | 0 | -4. 306491 | 1. 134178  | 0. 229079  |
| 11 | 7  | 0 | -3. 180755 | 0. 837839  | -0. 531879 |
| 12 | 6  | 0 | -2. 039782 | -0. 148605 | 2. 715459  |
| 13 | 6  | 0 | -3. 152271 | 0. 951376  | -1. 980689 |
| 14 | 6  | 0 | -2. 723736 | 2. 149250  | -2. 597677 |
| 15 | 6  | 0 | -2. 733022 | 2. 175357  | -3. 999834 |
| 16 | 6  | 0 | -3. 159431 | 1. 088377  | -4. 756432 |
| 17 | 6  | 0 | -3. 608459 | -0. 061527 | -4. 119220 |
| 18 | 6  | 0 | -3. 620334 | -0. 156464 | -2. 721766 |
| 19 | 6  | 0 | -1. 302062 | 0. 848689  | 3. 389710  |
| 20 | 6  | 0 | -0. 635451 | 0. 486666  | 4. 567050  |
| 21 | 6  | 0 | -0. 701876 | -0. 810643 | 5. 058350  |
| 22 | 6  | 0 | -1. 455686 | -1. 766649 | 4. 385012  |
| 23 | 6  | 0 | -2. 152788 | -1. 471309 | 3. 204675  |
| 24 | 7  | 0 | 3. 919284  | -1. 035342 | -0. 976021 |
| 25 | 6  | 0 | 5. 082395  | -1. 187017 | -1. 048982 |
| 26 | 7  | 0 | 6. 322557  | -1. 549612 | -0. 995999 |
| 27 | 6  | 0 | 6. 831960  | -2. 236042 | 0. 215846  |
| 28 | 6  | 0 | 7. 279492  | -1. 217918 | -2. 069092 |
| 29 | 6  | 0 | -2. 262119 | 3. 432530  | -1. 897452 |
| 30 | 6  | 0 | -3. 296049 | 4. 065865  | -0. 946500 |
| 31 | 6  | 0 | -0. 881062 | 3. 309638  | -1. 229501 |
| 32 | 6  | 0 | -4. 189489 | -1. 415889 | -2. 072003 |
| 33 | 6  | 0 | -5. 722141 | -1. 471495 | -2. 242455 |
| 34 | 6  | 0 | -3. 534474 | -2. 702286 | -2. 607637 |
| 35 | 6  | 0 | -2. 962311 | -2. 621105 | 2. 591748  |
| 36 | 6  | 0 | -4. 472909 | -2. 353280 | 2. 447693  |
| 37 | 6  | 0 | -2. 357915 | -3. 179494 | 1. 290300  |
| 38 | 6  | 0 | -1. 235192 | 2. 300313  | 2. 922028  |
| 39 | 6  | 0 | 0. 215074  | 2. 796767  | 2. 777226  |
| 40 | 6  | 0 | -2. 039760 | 3. 218460  | 3. 865268  |
| 41 | 6  | 0 | 0. 508669  | -3. 161972 | -1. 685571 |
| 42 | 6  | 0 | 3. 199370  | -4. 832467 | -0. 766756 |
| 43 | 16 | 0 | 2. 337231  | -3. 578711 | 0. 203401  |
| 44 | 8  | 0 | 1. 235930  | -4. 237970 | 0. 909225  |
| 45 | 8  | 0 | 3. 348120  | -2. 823821 | 0. 952853  |
| 46 | 1  | 0 | 1. 815158  | 1. 512392  | -0. 368467 |
| 47 | 1  | 0 | 4. 882572  | 1. 240109  | -0. 285862 |
| 48 | 1  | 0 | -4. 606141 | 0. 852116  | 2. 409509  |
| 49 | 1  | 0 | -5. 191119 | 1. 566661  | -0. 208498 |
| 50 | 1  | 0 | -2. 405158 | 3. 079484  | -4. 504510 |
| 51 | 1  | 0 | -3. 157654 | 1. 146923  | -5. 840780 |
| 52 | 1  | 0 | -3. 966606 | -0. 897173 | -4. 711743 |
| 53 | 1  | 0 | -0. 063557 | 1. 235486  | 5. 105376  |
| 54 | 1  | 0 | -0. 178487 | -1. 076659 | 5. 971816  |
| 55 | 1  | 0 | -1. 514590 | -2. 775072 | 4. 783570  |
| 56 | 1  | 0 | 5. 989434  | -2. 498487 | 0. 856359  |
| 57 | 1  | 0 | 7. 358775  | -3. 143188 | -0. 091934 |
| 58 | 1  | 0 | 7. 521455  | -1. 576266 | 0. 750170  |
| 59 | 1  | 0 | 6. 755914  | -0. 721469 | -2. 885915 |
| 60 | 1  | 0 | 8. 055996  | -0. 554923 | -1. 677123 |

|     |    |   |           |           |           |
|-----|----|---|-----------|-----------|-----------|
| 61  | 1  | 0 | 7.740416  | -2.138205 | -2.438048 |
| 62  | 1  | 0 | -2.136769 | 4.152543  | -2.714661 |
| 63  | 1  | 0 | -2.984668 | 5.085695  | -0.697836 |
| 64  | 1  | 0 | -3.393656 | 3.517943  | -0.006402 |
| 65  | 1  | 0 | -4.284227 | 4.126711  | -1.413885 |
| 66  | 1  | 0 | -0.900160 | 2.637326  | -0.368403 |
| 67  | 1  | 0 | -0.135061 | 2.931596  | -1.935315 |
| 68  | 1  | 0 | -0.547743 | 4.292810  | -0.881344 |
| 69  | 1  | 0 | -3.983092 | -1.377107 | -0.999705 |
| 70  | 1  | 0 | -6.207093 | -0.586309 | -1.819032 |
| 71  | 1  | 0 | -6.130862 | -2.354049 | -1.739615 |
| 72  | 1  | 0 | -6.001335 | -1.528360 | -3.299713 |
| 73  | 1  | 0 | -2.447131 | -2.670667 | -2.492354 |
| 74  | 1  | 0 | -3.911075 | -3.571392 | -2.058858 |
| 75  | 1  | 0 | -3.756422 | -2.864058 | -3.667205 |
| 76  | 1  | 0 | -2.878198 | -3.427783 | 3.329105  |
| 77  | 1  | 0 | -4.893995 | -1.929496 | 3.365320  |
| 78  | 1  | 0 | -4.992233 | -3.297005 | 2.251204  |
| 79  | 1  | 0 | -4.703923 | -1.677881 | 1.620418  |
| 80  | 1  | 0 | -2.902801 | -4.081195 | 0.988378  |
| 81  | 1  | 0 | -2.423705 | -2.458907 | 0.470889  |
| 82  | 1  | 0 | -1.305850 | -3.447408 | 1.423533  |
| 83  | 1  | 0 | -1.695843 | 2.368358  | 1.933125  |
| 84  | 1  | 0 | 0.795441  | 2.145921  | 2.116536  |
| 85  | 1  | 0 | 0.228352  | 3.807445  | 2.357540  |
| 86  | 1  | 0 | 0.730166  | 2.837361  | 3.742258  |
| 87  | 1  | 0 | -3.086377 | 2.905528  | 3.936380  |
| 88  | 1  | 0 | -2.019175 | 4.251450  | 3.502578  |
| 89  | 1  | 0 | -1.622272 | 3.210899  | 4.877472  |
| 90  | 1  | 0 | 0.763947  | -4.165486 | -2.032776 |
| 91  | 1  | 0 | 0.259761  | -2.558278 | -2.558209 |
| 92  | 1  | 0 | -0.353568 | -3.222019 | -1.016226 |
| 93  | 1  | 0 | 3.956690  | -4.347020 | -1.381470 |
| 94  | 1  | 0 | 3.657324  | -5.506314 | -0.039891 |
| 95  | 1  | 0 | 2.490469  | -5.384307 | -1.382750 |
| 96  | 6  | 0 | 4.044651  | 3.170929  | -0.033672 |
| 97  | 6  | 0 | 5.219186  | 3.850320  | 0.227978  |
| 98  | 16 | 0 | 2.698733  | 4.294810  | -0.069761 |
| 99  | 6  | 0 | 5.045805  | 5.249907  | 0.406517  |
| 100 | 1  | 0 | 6.178916  | 3.348744  | 0.294015  |
| 101 | 6  | 0 | 3.739801  | 5.637750  | 0.275432  |
| 102 | 1  | 0 | 5.854069  | 5.938847  | 0.621698  |
| 103 | 1  | 0 | 3.323639  | 6.632344  | 0.357292  |

Sum of electronic and zero-point Energies= -2911.408262  
Sum of electronic and thermal Energies= -2911.351782  
Sum of electronic and thermal Enthalpies= -2911.350838  
Sum of electronic and thermal Free Energies= -2911.506561

### C-tsa2

| Center Number | Atomic Number | Atomic Type | Coordinates (Angstroms) |           |           |
|---------------|---------------|-------------|-------------------------|-----------|-----------|
|               |               |             | X                       | Y         | Z         |
| 1             | 6             | 0           | 1.638758                | -0.270758 | -0.480096 |
| 2             | 6             | 0           | 2.606454                | 0.712755  | -0.599064 |
| 3             | 6             | 0           | 1.993308                | -1.602704 | -0.850997 |
| 4             | 7             | 0           | 2.482919                | 2.067366  | -0.253925 |
| 5             | 6             | 0           | 3.055069                | -2.372240 | -0.395984 |

|    |    |   |           |           |           |
|----|----|---|-----------|-----------|-----------|
| 6  | 79 | 0 | -0.422459 | -0.103089 | -0.200143 |
| 7  | 6  | 0 | -2.469685 | -0.078866 | 0.048361  |
| 8  | 7  | 0 | -3.255394 | 0.953977  | 0.470597  |
| 9  | 6  | 0 | -4.593176 | 0.574436  | 0.494366  |
| 10 | 6  | 0 | -4.641507 | -0.722735 | 0.104241  |
| 11 | 7  | 0 | -3.336158 | -1.107984 | -0.181186 |
| 12 | 6  | 0 | -2.806344 | 2.313707  | 0.714518  |
| 13 | 6  | 0 | -2.962015 | -2.470454 | -0.520763 |
| 14 | 6  | 0 | -2.647579 | -3.336380 | 0.549293  |
| 15 | 6  | 0 | -2.299201 | -4.658003 | 0.241369  |
| 16 | 6  | 0 | -2.273071 | -5.105153 | -1.073425 |
| 17 | 6  | 0 | -2.606788 | -4.234006 | -2.106366 |
| 18 | 6  | 0 | -2.964566 | -2.898895 | -1.869216 |
| 19 | 6  | 0 | -2.752761 | 3.182184  | -0.398178 |
| 20 | 6  | 0 | -2.328327 | 4.499597  | -0.180662 |
| 21 | 6  | 0 | -1.979778 | 4.940496  | 1.089926  |
| 22 | 6  | 0 | -2.065215 | 4.068500  | 2.171494  |
| 23 | 6  | 0 | -2.484411 | 2.737796  | 2.025475  |
| 24 | 7  | 0 | 3.764845  | 0.458148  | -1.316974 |
| 25 | 6  | 0 | 4.301069  | -0.622845 | -1.603456 |
| 26 | 7  | 0 | 5.504944  | -1.097950 | -1.757454 |
| 27 | 6  | 0 | 6.662895  | -0.476965 | -1.076867 |
| 28 | 6  | 0 | 5.762007  | -2.323284 | -2.518462 |
| 29 | 1  | 0 | 3.177676  | -3.336284 | -0.888262 |
| 30 | 6  | 0 | -3.309888 | -2.060033 | -3.106211 |
| 31 | 6  | 0 | -4.712174 | -1.422144 | -3.106196 |
| 32 | 6  | 0 | -2.221261 | -1.031741 | -3.467375 |
| 33 | 6  | 0 | 4.180638  | 3.567627  | -1.857072 |
| 34 | 16 | 0 | 3.913121  | 3.056158  | -0.153722 |
| 35 | 8  | 0 | 5.047484  | 2.235572  | 0.282177  |
| 36 | 8  | 0 | 3.523653  | 4.235869  | 0.614388  |
| 37 | 6  | 0 | 1.310741  | 2.531890  | 0.496049  |
| 38 | 6  | 0 | -2.542149 | 1.900126  | 3.309580  |
| 39 | 6  | 0 | -1.405887 | 0.865562  | 3.415649  |
| 40 | 6  | 0 | -3.911282 | 1.270081  | 3.629125  |
| 41 | 6  | 0 | -3.166858 | 2.766096  | -1.808174 |
| 42 | 6  | 0 | -4.434638 | 3.521670  | -2.256566 |
| 43 | 6  | 0 | -2.023399 | 2.954181  | -2.823581 |
| 44 | 6  | 0 | -2.699177 | -2.912959 | 2.015410  |
| 45 | 6  | 0 | -3.813999 | -3.665139 | 2.770508  |
| 46 | 6  | 0 | -1.336843 | -3.095493 | 2.711718  |
| 47 | 1  | 0 | 1.348970  | -2.096593 | -1.579264 |
| 48 | 1  | 0 | -5.373106 | 1.256709  | 0.789930  |
| 49 | 1  | 0 | -5.471461 | -1.401754 | -0.001936 |
| 50 | 1  | 0 | -2.056428 | -5.343955 | 1.046670  |
| 51 | 1  | 0 | -2.007933 | -6.134637 | -1.295430 |
| 52 | 1  | 0 | -2.600255 | -4.595637 | -3.130576 |
| 53 | 1  | 0 | -2.281988 | 5.187862  | -1.018637 |
| 54 | 1  | 0 | -1.656229 | 5.965655  | 1.243361  |
| 55 | 1  | 0 | -1.808733 | 4.426256  | 3.164391  |
| 56 | 1  | 0 | 7.047638  | -1.169531 | -0.321813 |
| 57 | 1  | 0 | 7.443237  | -0.275557 | -1.816697 |
| 58 | 1  | 0 | 6.345466  | 0.450636  | -0.601330 |
| 59 | 1  | 0 | 4.839000  | -2.661244 | -2.987598 |
| 60 | 1  | 0 | 6.508000  | -2.119541 | -3.292292 |
| 61 | 1  | 0 | 6.145912  | -3.103523 | -1.853724 |
| 62 | 1  | 0 | -3.320965 | -2.786875 | -3.926881 |
| 63 | 1  | 0 | -5.480568 | -2.144973 | -2.813439 |
| 64 | 1  | 0 | -4.952966 | -1.075943 | -4.116556 |

|     |    |   |           |           |           |
|-----|----|---|-----------|-----------|-----------|
| 65  | 1  | 0 | -4.782542 | -0.557993 | -2.441701 |
| 66  | 1  | 0 | -1.242007 | -1.511911 | -3.561044 |
| 67  | 1  | 0 | -2.458347 | -0.559542 | -4.427032 |
| 68  | 1  | 0 | -2.133725 | -0.244014 | -2.715486 |
| 69  | 1  | 0 | 3.301793  | 4.121569  | -2.187646 |
| 70  | 1  | 0 | 5.059665  | 4.215556  | -1.847970 |
| 71  | 1  | 0 | 4.350283  | 2.684787  | -2.471036 |
| 72  | 1  | 0 | 0.418019  | 2.445759  | -0.128086 |
| 73  | 1  | 0 | 1.463291  | 3.573653  | 0.767704  |
| 74  | 1  | 0 | 1.169202  | 1.941239  | 1.405866  |
| 75  | 1  | 0 | -2.362286 | 2.627014  | 4.110204  |
| 76  | 1  | 0 | -1.431138 | 0.384569  | 4.399476  |
| 77  | 1  | 0 | -1.486869 | 0.084647  | 2.655781  |
| 78  | 1  | 0 | -0.427302 | 1.342216  | 3.301378  |
| 79  | 1  | 0 | -4.722914 | 1.995809  | 3.514043  |
| 80  | 1  | 0 | -3.918744 | 0.929562  | 4.669566  |
| 81  | 1  | 0 | -4.133600 | 0.403290  | 3.002644  |
| 82  | 1  | 0 | -3.412856 | 1.701407  | -1.798533 |
| 83  | 1  | 0 | -5.264490 | 3.361396  | -1.561054 |
| 84  | 1  | 0 | -4.751426 | 3.178876  | -3.246880 |
| 85  | 1  | 0 | -4.257627 | 4.600277  | -2.318496 |
| 86  | 1  | 0 | -1.135648 | 2.383970  | -2.531285 |
| 87  | 1  | 0 | -2.337879 | 2.608570  | -3.813633 |
| 88  | 1  | 0 | -1.735302 | 4.006085  | -2.919172 |
| 89  | 1  | 0 | -2.941434 | -1.848354 | 2.061577  |
| 90  | 1  | 0 | -4.791754 | -3.508085 | 2.304041  |
| 91  | 1  | 0 | -3.872984 | -3.316596 | 3.806660  |
| 92  | 1  | 0 | -3.626523 | -4.743537 | 2.792796  |
| 93  | 1  | 0 | -1.035586 | -4.147643 | 2.741459  |
| 94  | 1  | 0 | -0.550966 | -2.532918 | 2.197919  |
| 95  | 1  | 0 | -1.391306 | -2.739811 | 3.745720  |
| 96  | 6  | 0 | 3.854422  | -2.264916 | 0.803940  |
| 97  | 6  | 0 | 4.793501  | -3.207903 | 1.198060  |
| 98  | 16 | 0 | 3.740315  | -0.993714 | 2.007345  |
| 99  | 6  | 0 | 5.415875  | -2.913672 | 2.437351  |
| 100 | 1  | 0 | 5.003251  | -4.097589 | 0.613160  |
| 101 | 6  | 0 | 4.946180  | -1.748802 | 2.989335  |
| 102 | 1  | 0 | 6.167154  | -3.538635 | 2.905049  |
| 103 | 1  | 0 | 5.235758  | -1.289861 | 3.925152  |

Sum of electronic and zero-point Energies= -2911.393830  
Sum of electronic and thermal Energies= -2911.338808  
Sum of electronic and thermal Enthalpies= -2911.337864  
Sum of electronic and thermal Free Energies= -2911.489651

### C-tsb2

| Center<br>Number | Atomic<br>Number | Atomic<br>Type | Coordinates (Angstroms) |           |           |
|------------------|------------------|----------------|-------------------------|-----------|-----------|
|                  |                  |                | X                       | Y         | Z         |
| 1                | 6                | 0              | 2.448088                | 1.579529  | -0.126245 |
| 2                | 6                | 0              | 1.064631                | 2.050709  | -0.084843 |
| 3                | 6                | 0              | 2.804730                | 0.311199  | 0.389057  |
| 4                | 7                | 0              | 0.825892                | 3.364098  | -0.062895 |
| 5                | 6                | 0              | 4.117464                | -0.143615 | 0.258153  |
| 6                | 79               | 0              | -0.397900               | 0.555796  | -0.128577 |
| 7                | 6                | 0              | -1.748569               | -1.016081 | -0.137310 |
| 8                | 7                | 0              | -2.728772               | -1.256299 | 0.782170  |
| 9                | 6                | 0              | -3.413350               | -2.424873 | 0.474195  |

|    |    |   |           |           |           |
|----|----|---|-----------|-----------|-----------|
| 10 | 6  | 0 | -2.845219 | -2.932728 | -0.646158 |
| 11 | 7  | 0 | -1.833140 | -2.056236 | -1.019420 |
| 12 | 6  | 0 | -3.141214 | -0.366614 | 1.858029  |
| 13 | 6  | 0 | -0.924098 | -2.334911 | -2.118987 |
| 14 | 6  | 0 | 0.203702  | -3.136717 | -1.833348 |
| 15 | 6  | 0 | 1.079789  | -3.430332 | -2.885953 |
| 16 | 6  | 0 | 0.842161  | -2.958339 | -4.170972 |
| 17 | 6  | 0 | -0.295104 | -2.199944 | -4.429374 |
| 18 | 6  | 0 | -1.216865 | -1.874283 | -3.423554 |
| 19 | 6  | 0 | -2.580802 | -0.497501 | 3.149445  |
| 20 | 6  | 0 | -3.043802 | 0.393839  | 4.128215  |
| 21 | 6  | 0 | -4.020680 | 1.346342  | 3.857276  |
| 22 | 6  | 0 | -4.578635 | 1.421866  | 2.587483  |
| 23 | 6  | 0 | -4.156829 | 0.569216  | 1.560497  |
| 24 | 7  | 0 | 3.456150  | 2.374666  | -0.564144 |
| 25 | 6  | 0 | 4.678878  | 2.032732  | -0.378134 |
| 26 | 7  | 0 | 5.742093  | 2.244899  | -1.125726 |
| 27 | 6  | 0 | 5.669791  | 2.604041  | -2.550344 |
| 28 | 6  | 0 | 7.083363  | 2.076261  | -0.562759 |
| 29 | 1  | 0 | 4.583435  | -0.059409 | -0.719486 |
| 30 | 6  | 0 | -2.446396 | -1.071589 | -3.867354 |
| 31 | 6  | 0 | -3.808207 | -1.723357 | -3.560753 |
| 32 | 6  | 0 | -2.411862 | 0.400451  | -3.418126 |
| 33 | 6  | 0 | -4.849052 | 0.642203  | 0.200519  |
| 34 | 6  | 0 | -6.225896 | -0.054029 | 0.253964  |
| 35 | 6  | 0 | -4.997754 | 2.084095  | -0.319509 |
| 36 | 6  | 0 | -1.540991 | -1.527590 | 3.609500  |
| 37 | 6  | 0 | -1.952012 | -2.999630 | 3.414057  |
| 38 | 6  | 0 | -0.119321 | -1.264493 | 3.079827  |
| 39 | 6  | 0 | 0.461025  | -3.748019 | -0.457450 |
| 40 | 6  | 0 | 0.034294  | -5.231656 | -0.436505 |
| 41 | 6  | 0 | 1.924515  | -3.605770 | -0.003049 |
| 42 | 6  | 0 | -1.210004 | 3.717570  | -1.939001 |
| 43 | 16 | 0 | -0.878339 | 3.969741  | -0.190056 |
| 44 | 8  | 0 | -0.795747 | 5.403427  | 0.068016  |
| 45 | 8  | 0 | -1.735303 | 3.107980  | 0.617061  |
| 46 | 6  | 0 | 1.822452  | 4.440610  | 0.158734  |
| 47 | 1  | 0 | 2.098867  | -0.207086 | 1.031076  |
| 48 | 1  | 0 | -4.228764 | -2.781695 | 1.081282  |
| 49 | 1  | 0 | -3.066607 | -3.820412 | -1.215108 |
| 50 | 1  | 0 | 1.951637  | -4.046950 | -2.695064 |
| 51 | 1  | 0 | 1.529534  | -3.198168 | -4.976777 |
| 52 | 1  | 0 | -0.488869 | -1.858866 | -5.442233 |
| 53 | 1  | 0 | -2.630870 | 0.325276  | 5.130410  |
| 54 | 1  | 0 | -4.356653 | 2.017818  | 4.641589  |
| 55 | 1  | 0 | -5.355539 | 2.151856  | 2.387553  |
| 56 | 1  | 0 | 6.254984  | 3.511389  | -2.730792 |
| 57 | 1  | 0 | 6.078290  | 1.796750  | -3.168760 |
| 58 | 1  | 0 | 4.629817  | 2.783898  | -2.819517 |
| 59 | 1  | 0 | 7.642453  | 3.015129  | -0.636508 |
| 60 | 1  | 0 | 6.995519  | 1.786874  | 0.483826  |
| 61 | 1  | 0 | 7.631262  | 1.301181  | -1.110185 |
| 62 | 1  | 0 | -2.371914 | -1.051988 | -4.960827 |
| 63 | 1  | 0 | -3.819678 | -2.778448 | -3.852132 |
| 64 | 1  | 0 | -4.590941 | -1.214949 | -4.133022 |
| 65 | 1  | 0 | -4.081207 | -1.655460 | -2.505330 |
| 66 | 1  | 0 | -1.475052 | 0.875142  | -3.728856 |
| 67 | 1  | 0 | -3.240459 | 0.951071  | -3.877038 |
| 68 | 1  | 0 | -2.500804 | 0.496869  | -2.332841 |



|     |    |   |           |           |           |
|-----|----|---|-----------|-----------|-----------|
| 69  | 1  | 0 | -4.235432 | 0.103435  | -0.527213 |
| 70  | 1  | 0 | -6.143204 | -1.101513 | 0.559892  |
| 71  | 1  | 0 | -6.707746 | -0.026792 | -0.729015 |
| 72  | 1  | 0 | -6.888712 | 0.447413  | 0.966816  |
| 73  | 1  | 0 | -4.042345 | 2.613458  | -0.295369 |
| 74  | 1  | 0 | -5.372307 | 2.070223  | -1.348602 |
| 75  | 1  | 0 | -5.714766 | 2.659936  | 0.274088  |
| 76  | 1  | 0 | -1.485098 | -1.381428 | 4.694436  |
| 77  | 1  | 0 | -2.968416 | -3.181661 | 3.777664  |
| 78  | 1  | 0 | -1.276487 | -3.645918 | 3.984064  |
| 79  | 1  | 0 | -1.899655 | -3.316324 | 2.369489  |
| 80  | 1  | 0 | 0.185529  | -0.230605 | 3.269300  |
| 81  | 1  | 0 | 0.594415  | -1.926777 | 3.581873  |
| 82  | 1  | 0 | -0.044642 | -1.446784 | 2.004501  |
| 83  | 1  | 0 | -0.153626 | -3.217892 | 0.275105  |
| 84  | 1  | 0 | -1.021160 | -5.356957 | -0.696496 |
| 85  | 1  | 0 | 0.189180  | -5.659539 | 0.559328  |
| 86  | 1  | 0 | 0.623294  | -5.817734 | -1.149793 |
| 87  | 1  | 0 | 2.267074  | -2.569704 | -0.063162 |
| 88  | 1  | 0 | 2.027138  | -3.939878 | 1.034054  |
| 89  | 1  | 0 | 2.601694  | -4.218977 | -0.606161 |
| 90  | 1  | 0 | -1.136128 | 2.655227  | -2.167680 |
| 91  | 1  | 0 | -2.225612 | 4.082164  | -2.106827 |
| 92  | 1  | 0 | -0.493695 | 4.308999  | -2.510414 |
| 93  | 1  | 0 | 2.389257  | 4.630060  | -0.753549 |
| 94  | 1  | 0 | 2.507251  | 4.122372  | 0.942675  |
| 95  | 1  | 0 | 1.292495  | 5.336986  | 0.471284  |
| 96  | 6  | 0 | 4.762092  | -1.097026 | 1.132570  |
| 97  | 6  | 0 | 5.838089  | -1.914411 | 0.838050  |
| 98  | 16 | 0 | 4.265518  | -1.330225 | 2.799178  |
| 99  | 6  | 0 | 6.245030  | -2.732618 | 1.925173  |
| 100 | 1  | 0 | 6.311340  | -1.927479 | -0.138141 |
| 101 | 6  | 0 | 5.486885  | -2.531047 | 3.049403  |
| 102 | 1  | 0 | 7.064207  | -3.440469 | 1.878466  |
| 103 | 1  | 0 | 5.577931  | -3.013863 | 4.012695  |

Sum of electronic and zero-point Energies= -2911.398421

Sum of electronic and thermal Energies= -2911.343462

Sum of electronic and thermal Enthalpies= -2911.342518

Sum of electronic and thermal Free Energies= -2911.492958

### C-a2

| Center<br>Number | Atomic<br>Number | Atomic<br>Type | Coordinates (Angstroms) |           |           |
|------------------|------------------|----------------|-------------------------|-----------|-----------|
|                  |                  |                | X                       | Y         | Z         |
| 1                | 6                | 0              | 1.621880                | -0.227751 | -0.193490 |
| 2                | 6                | 0              | 2.592812                | 0.868430  | -0.373503 |
| 3                | 6                | 0              | 2.222826                | -1.441633 | -0.231141 |
| 4                | 7                | 0              | 2.387107                | 2.094145  | 0.165764  |
| 5                | 6                | 0              | 3.698851                | -1.666680 | -0.502762 |
| 6                | 79               | 0              | -0.451029               | -0.122128 | -0.067125 |
| 7                | 6                | 0              | -2.513205               | -0.134005 | -0.006255 |
| 8                | 7                | 0              | -3.346830               | 0.864778  | 0.407426  |
| 9                | 6                | 0              | -4.676967               | 0.476670  | 0.285151  |
| 10               | 6                | 0              | -4.673821               | -0.793615 | -0.187758 |
| 11               | 7                | 0              | -3.343328               | -1.151698 | -0.376530 |
| 12               | 6                | 0              | -2.934344               | 2.206740  | 0.778825  |
| 13               | 6                | 0              | -2.922614               | -2.488118 | -0.762886 |

|    |    |   |           |           |           |
|----|----|---|-----------|-----------|-----------|
| 14 | 6  | 0 | -2.698225 | -3.416987 | 0.276633  |
| 15 | 6  | 0 | -2.304428 | -4.713975 | -0.077963 |
| 16 | 6  | 0 | -2.149364 | -5.077730 | -1.409456 |
| 17 | 6  | 0 | -2.397608 | -4.146425 | -2.413477 |
| 18 | 6  | 0 | -2.794034 | -2.831697 | -2.129250 |
| 19 | 6  | 0 | -2.783365 | 3.145674  | -0.265709 |
| 20 | 6  | 0 | -2.385939 | 4.445816  | 0.073778  |
| 21 | 6  | 0 | -2.158044 | 4.803920  | 1.396791  |
| 22 | 6  | 0 | -2.339710 | 3.864359  | 2.407564  |
| 23 | 6  | 0 | -2.737078 | 2.546032  | 2.138425  |
| 24 | 7  | 0 | 3.724727  | 0.735511  | -1.093524 |
| 25 | 6  | 0 | 4.273756  | -0.462988 | -1.221575 |
| 26 | 7  | 0 | 5.380714  | -0.580324 | -1.962212 |
| 27 | 6  | 0 | 5.916541  | 0.606785  | -2.642485 |
| 28 | 6  | 0 | 6.066867  | -1.861075 | -2.162229 |
| 29 | 1  | 0 | 3.770227  | -2.533511 | -1.171057 |
| 30 | 6  | 0 | -3.035439 | -1.920003 | -3.338870 |
| 31 | 6  | 0 | -4.445874 | -1.307670 | -3.435447 |
| 32 | 6  | 0 | -1.941249 | -0.852247 | -3.525954 |
| 33 | 6  | 0 | 3.681319  | 3.781804  | -1.665403 |
| 34 | 16 | 0 | 3.681903  | 3.347596  | 0.078264  |
| 35 | 8  | 0 | 4.953204  | 2.748375  | 0.469944  |
| 36 | 8  | 0 | 3.131725  | 4.474499  | 0.824745  |
| 37 | 6  | 0 | 1.244625  | 2.419144  | 1.041140  |
| 38 | 6  | 0 | -2.907406 | 1.627922  | 3.355835  |
| 39 | 6  | 0 | -1.775689 | 0.593191  | 3.501647  |
| 40 | 6  | 0 | -4.294018 | 0.973383  | 3.505012  |
| 41 | 6  | 0 | -3.066393 | 2.822067  | -1.731202 |
| 42 | 6  | 0 | -4.284506 | 3.615186  | -2.247133 |
| 43 | 6  | 0 | -1.832562 | 3.062593  | -2.622028 |
| 44 | 6  | 0 | -2.894199 | -3.087633 | 1.754793  |
| 45 | 6  | 0 | -4.068062 | -3.891601 | 2.350311  |
| 46 | 6  | 0 | -1.603601 | -3.307935 | 2.567008  |
| 47 | 1  | 0 | 1.651480  | -2.348788 | -0.055211 |
| 48 | 1  | 0 | -5.488900 | 1.133490  | 0.550739  |
| 49 | 1  | 0 | -5.482524 | -1.470099 | -0.410422 |
| 50 | 1  | 0 | -2.128509 | -5.447205 | 0.702689  |
| 51 | 1  | 0 | -1.849518 | -6.088849 | -1.668417 |
| 52 | 1  | 0 | -2.289771 | -4.443013 | -3.452770 |
| 53 | 1  | 0 | -2.267227 | 5.186928  | -0.710336 |
| 54 | 1  | 0 | -1.854937 | 5.816744  | 1.644761  |
| 55 | 1  | 0 | -2.179213 | 4.157550  | 3.440986  |
| 56 | 1  | 0 | 6.905729  | 0.369785  | -3.032172 |
| 57 | 1  | 0 | 5.270599  | 0.906096  | -3.474147 |
| 58 | 1  | 0 | 5.989527  | 1.431617  | -1.931738 |
| 59 | 1  | 0 | 6.013996  | -2.473752 | -1.263011 |
| 60 | 1  | 0 | 5.644965  | -2.411099 | -3.011834 |
| 61 | 1  | 0 | 7.119087  | -1.663159 | -2.367922 |
| 62 | 1  | 0 | -2.950121 | -2.592086 | -4.200793 |
| 63 | 1  | 0 | -5.221781 | -2.061683 | -3.267991 |
| 64 | 1  | 0 | -4.595699 | -0.897638 | -4.439535 |
| 65 | 1  | 0 | -4.600755 | -0.491996 | -2.725384 |
| 66 | 1  | 0 | -0.945798 | -1.306829 | -3.541815 |
| 67 | 1  | 0 | -2.090974 | -0.329055 | -4.476876 |
| 68 | 1  | 0 | -1.952391 | -0.108947 | -2.725520 |
| 69 | 1  | 0 | 2.706991  | 4.208991  | -1.903634 |
| 70 | 1  | 0 | 4.465857  | 4.532644  | -1.783152 |
| 71 | 1  | 0 | 3.892436  | 2.887485  | -2.246776 |
| 72 | 1  | 0 | 0.325945  | 2.491164  | 0.456436  |

|     |    |   |           |           |           |
|-----|----|---|-----------|-----------|-----------|
| 73  | 1  | 0 | 1.447423  | 3.376623  | 1.515644  |
| 74  | 1  | 0 | 1.132706  | 1.648188  | 1.803109  |
| 75  | 1  | 0 | -2.810525 | 2.302776  | 4.214287  |
| 76  | 1  | 0 | -1.890256 | 0.046050  | 4.443578  |
| 77  | 1  | 0 | -1.774147 | -0.133517 | 2.685920  |
| 78  | 1  | 0 | -0.795820 | 1.080864  | 3.516328  |
| 79  | 1  | 0 | -5.098504 | 1.701591  | 3.359549  |
| 80  | 1  | 0 | -4.395242 | 0.568390  | 4.517033  |
| 81  | 1  | 0 | -4.448109 | 0.146728  | 2.807905  |
| 82  | 1  | 0 | -3.315439 | 1.761185  | -1.811428 |
| 83  | 1  | 0 | -5.175200 | 3.420354  | -1.641658 |
| 84  | 1  | 0 | -4.510001 | 3.335465  | -3.281273 |
| 85  | 1  | 0 | -4.099260 | 4.694003  | -2.226795 |
| 86  | 1  | 0 | -0.979724 | 2.464456  | -2.284321 |
| 87  | 1  | 0 | -2.053919 | 2.783158  | -3.657092 |
| 88  | 1  | 0 | -1.533078 | 4.115825  | -2.622519 |
| 89  | 1  | 0 | -3.151073 | -2.029221 | 1.844355  |
| 90  | 1  | 0 | -4.998111 | -3.710200 | 1.802300  |
| 91  | 1  | 0 | -4.230171 | -3.609850 | 3.395744  |
| 92  | 1  | 0 | -3.871572 | -4.968249 | 2.322846  |
| 93  | 1  | 0 | -1.294034 | -4.357977 | 2.558756  |
| 94  | 1  | 0 | -0.778342 | -2.708532 | 2.169519  |
| 95  | 1  | 0 | -1.761257 | -3.020155 | 3.611469  |
| 96  | 6  | 0 | 4.477772  | -1.971841 | 0.770028  |
| 97  | 6  | 0 | 5.126307  | -1.098951 | 1.607926  |
| 98  | 16 | 0 | 4.556286  | -3.604908 | 1.386421  |
| 99  | 6  | 0 | 5.693650  | -1.742922 | 2.749694  |
| 100 | 1  | 0 | 5.206064  | -0.032769 | 1.420927  |
| 101 | 6  | 0 | 5.468397  | -3.090647 | 2.769033  |
| 102 | 1  | 0 | 6.250482  | -1.220862 | 3.518888  |
| 103 | 1  | 0 | 5.785329  | -3.817381 | 3.504024  |

Sum of electronic and zero-point Energies= -2911.464288  
Sum of electronic and thermal Energies= -2911.409477  
Sum of electronic and thermal Enthalpies= -2911.408533  
Sum of electronic and thermal Free Energies= -2911.560928

### C-b2

| Center Number | Atomic Number | Atomic Type | Coordinates (Angstroms) |           |           |
|---------------|---------------|-------------|-------------------------|-----------|-----------|
|               |               |             | X                       | Y         | Z         |
| 1             | 6             | 0           | 2.275934                | 1.790455  | -0.309085 |
| 2             | 6             | 0           | 0.849594                | 2.128843  | -0.413405 |
| 3             | 6             | 0           | 2.738246                | 0.538888  | -0.595761 |
| 4             | 7             | 0           | 0.472376                | 3.387526  | -0.591067 |
| 5             | 6             | 0           | 4.245152                | 0.569209  | -0.492868 |
| 6             | 79            | 0           | -0.473082               | 0.519589  | -0.188669 |
| 7             | 6             | 0           | -1.688754               | -1.134733 | 0.067213  |
| 8             | 7             | 0           | -2.813761               | -1.253316 | 0.829914  |
| 9             | 6             | 0           | -3.333615               | -2.538786 | 0.735852  |
| 10            | 6             | 0           | -2.514544               | -3.239891 | -0.085305 |
| 11            | 7             | 0           | -1.516257               | -2.365864 | -0.498220 |
| 12            | 6             | 0           | -3.499669               | -0.187000 | 1.545178  |
| 13            | 6             | 0           | -0.355906               | -2.785195 | -1.263835 |
| 14            | 6             | 0           | 0.732073                | -3.313834 | -0.533899 |
| 15            | 6             | 0           | 1.869850                | -3.706777 | -1.251147 |
| 16            | 6             | 0           | 1.918646                | -3.593859 | -2.635659 |
| 17            | 6             | 0           | 0.815118                | -3.106896 | -3.330451 |

|    |    |   |           |           |           |
|----|----|---|-----------|-----------|-----------|
| 18 | 6  | 0 | -0.355519 | -2.697537 | -2.675019 |
| 19 | 6  | 0 | -3.180452 | 0.091786  | 2.893918  |
| 20 | 6  | 0 | -3.909444 | 1.117867  | 3.512358  |
| 21 | 6  | 0 | -4.912985 | 1.815716  | 2.848719  |
| 22 | 6  | 0 | -5.224679 | 1.492975  | 1.534322  |
| 23 | 6  | 0 | -4.528793 | 0.487781  | 0.852697  |
| 24 | 7  | 0 | 3.312111  | 2.693501  | 0.021822  |
| 25 | 6  | 0 | 4.442255  | 2.031133  | -0.059103 |
| 26 | 7  | 0 | 5.636854  | 2.584285  | 0.228070  |
| 27 | 6  | 0 | 5.691534  | 3.988142  | 0.631340  |
| 28 | 6  | 0 | 6.912724  | 1.969058  | -0.120955 |
| 29 | 1  | 0 | 4.677625  | 0.433509  | -1.495771 |
| 30 | 6  | 0 | -1.511663 | -2.233033 | -3.569601 |
| 31 | 6  | 0 | -2.813683 | -3.042129 | -3.412473 |
| 32 | 6  | 0 | -1.781507 | -0.717660 | -3.514276 |
| 33 | 6  | 0 | -4.942161 | 0.137314  | -0.575367 |
| 34 | 6  | 0 | -6.264963 | -0.657151 | -0.586458 |
| 35 | 6  | 0 | -5.052111 | 1.381444  | -1.476450 |
| 36 | 6  | 0 | -2.138201 | -0.617817 | 3.767605  |
| 37 | 6  | 0 | -2.313285 | -2.143426 | 3.888290  |
| 38 | 6  | 0 | -0.683758 | -0.237205 | 3.431991  |
| 39 | 6  | 0 | 0.691484  | -3.535815 | 0.976965  |
| 40 | 6  | 0 | 0.572641  | -5.041069 | 1.296782  |
| 41 | 6  | 0 | 1.897623  | -2.916949 | 1.704519  |
| 42 | 6  | 0 | -1.544878 | 3.276457  | -2.516567 |
| 43 | 16 | 0 | -1.295640 | 3.785141  | -0.807526 |
| 44 | 8  | 0 | -1.354987 | 5.239052  | -0.726530 |
| 45 | 8  | 0 | -2.075757 | 2.940868  | 0.090223  |
| 46 | 6  | 0 | 1.308432  | 4.608132  | -0.739837 |
| 47 | 1  | 0 | 2.161921  | -0.334756 | -0.865485 |
| 48 | 1  | 0 | -4.225241 | -2.829210 | 1.266564  |
| 49 | 1  | 0 | -2.544751 | -4.265992 | -0.412882 |
| 50 | 1  | 0 | 2.720893  | -4.114573 | -0.715964 |
| 51 | 1  | 0 | 2.806346  | -3.906268 | -3.177620 |
| 52 | 1  | 0 | 0.850320  | -3.052309 | -4.414675 |
| 53 | 1  | 0 | -3.686390 | 1.362269  | 4.546786  |
| 54 | 1  | 0 | -5.459795 | 2.600448  | 3.362567  |
| 55 | 1  | 0 | -6.021500 | 2.026732  | 1.027206  |
| 56 | 1  | 0 | 4.795271  | 4.239380  | 1.197293  |
| 57 | 1  | 0 | 6.575008  | 4.140808  | 1.255952  |
| 58 | 1  | 0 | 5.756749  | 4.653019  | -0.239520 |
| 59 | 1  | 0 | 7.602499  | 2.043989  | 0.725188  |
| 60 | 1  | 0 | 6.787438  | 0.915246  | -0.359422 |
| 61 | 1  | 0 | 7.365574  | 2.479260  | -0.981125 |
| 62 | 1  | 0 | -1.159845 | -2.435858 | -4.587838 |
| 63 | 1  | 0 | -2.618276 | -4.118944 | -3.433189 |
| 64 | 1  | 0 | -3.488920 | -2.812633 | -4.243111 |
| 65 | 1  | 0 | -3.344538 | -2.806586 | -2.486964 |
| 66 | 1  | 0 | -0.860578 | -0.151026 | -3.687719 |
| 67 | 1  | 0 | -2.502486 | -0.442424 | -4.291952 |
| 68 | 1  | 0 | -2.192255 | -0.410524 | -2.549226 |
| 69 | 1  | 0 | -4.170609 | -0.503682 | -1.011276 |
| 70 | 1  | 0 | -6.190176 | -1.579628 | -0.002349 |
| 71 | 1  | 0 | -6.541788 | -0.927988 | -1.610744 |
| 72 | 1  | 0 | -7.082057 | -0.063510 | -0.163699 |
| 73 | 1  | 0 | -4.143967 | 1.986541  | -1.417541 |
| 74 | 1  | 0 | -5.211437 | 1.078613  | -2.516693 |
| 75 | 1  | 0 | -5.895659 | 2.018018  | -1.191949 |
| 76 | 1  | 0 | -2.323438 | -0.223552 | 4.773542  |

|     |    |   |           |           |           |
|-----|----|---|-----------|-----------|-----------|
| 77  | 1  | 0 | -3.350262 | -2.409064 | 4.117828  |
| 78  | 1  | 0 | -1.687963 | -2.518450 | 4.705116  |
| 79  | 1  | 0 | -2.017125 | -2.676262 | 2.981517  |
| 80  | 1  | 0 | -0.558031 | 0.849482  | 3.404353  |
| 81  | 1  | 0 | -0.009144 | -0.637974 | 4.196749  |
| 82  | 1  | 0 | -0.366643 | -0.635599 | 2.464753  |
| 83  | 1  | 0 | -0.201675 | -3.048210 | 1.374735  |
| 84  | 1  | 0 | -0.309647 | -5.486647 | 0.826492  |
| 85  | 1  | 0 | 0.494196  | -5.195611 | 2.377763  |
| 86  | 1  | 0 | 1.450264  | -5.591607 | 0.942341  |
| 87  | 1  | 0 | 1.985128  | -1.846194 | 1.500349  |
| 88  | 1  | 0 | 1.785453  | -3.046693 | 2.785790  |
| 89  | 1  | 0 | 2.841110  | -3.390365 | 1.416935  |
| 90  | 1  | 0 | -1.373979 | 2.203013  | -2.596596 |
| 91  | 1  | 0 | -2.580221 | 3.525791  | -2.757326 |
| 92  | 1  | 0 | -0.862417 | 3.846610  | -3.148131 |
| 93  | 1  | 0 | 2.334901  | 4.339774  | -0.505908 |
| 94  | 1  | 0 | 0.939702  | 5.372503  | -0.057357 |
| 95  | 1  | 0 | 1.222519  | 4.981811  | -1.763873 |
| 96  | 6  | 0 | 4.820984  | -0.466092 | 0.446379  |
| 97  | 6  | 0 | 4.859158  | -0.443703 | 1.817885  |
| 98  | 16 | 0 | 5.537916  | -1.935165 | -0.167654 |
| 99  | 6  | 0 | 5.468648  | -1.605340 | 2.381994  |
| 100 | 1  | 0 | 4.477059  | 0.382443  | 2.407558  |
| 101 | 6  | 0 | 5.885837  | -2.499394 | 1.435043  |
| 102 | 1  | 0 | 5.597737  | -1.761961 | 3.446574  |
| 103 | 1  | 0 | 6.384707  | -3.448028 | 1.577324  |

Sum of electronic and zero-point Energies= -2911.450662  
Sum of electronic and thermal Energies= -2911.395741  
Sum of electronic and thermal Enthalpies= -2911.394797  
Sum of electronic and thermal Free Energies= -2911.544987

### C-tsa3

| Center<br>Number | Atomic<br>Number | Atomic<br>Type | Coordinates (Angstroms) |           |           |
|------------------|------------------|----------------|-------------------------|-----------|-----------|
|                  |                  |                | X                       | Y         | Z         |
| 1                | 6                | 0              | 0.119487                | 1.035283  | 1.087711  |
| 2                | 6                | 0              | 0.480097                | 2.431135  | 0.997752  |
| 3                | 6                | 0              | 1.161231                | 0.257290  | 1.549490  |
| 4                | 7                | 0              | -0.477493               | 3.417923  | 0.771261  |
| 5                | 6                | 0              | 2.539217                | 0.694867  | 1.721790  |
| 6                | 79               | 0              | -1.596205               | 0.060560  | 0.453594  |
| 7                | 6                | 0              | -3.217100               | -1.028096 | -0.225701 |
| 8                | 7                | 0              | -4.500557               | -0.605730 | -0.438017 |
| 9                | 6                | 0              | -5.293413               | -1.647816 | -0.910220 |
| 10               | 6                | 0              | -4.502235               | -2.746145 | -0.969055 |
| 11               | 7                | 0              | -3.231788               | -2.351696 | -0.564505 |
| 12               | 6                | 0              | -4.962323               | 0.766426  | -0.349821 |
| 13               | 6                | 0              | -2.121255               | -3.272661 | -0.392781 |
| 14               | 6                | 0              | -1.964166               | -3.860336 | 0.880951  |
| 15               | 6                | 0              | -0.894539               | -4.744595 | 1.067327  |
| 16               | 6                | 0              | -0.015429               | -5.033291 | 0.032055  |
| 17               | 6                | 0              | -0.207932               | -4.457360 | -1.219144 |
| 18               | 6                | 0              | -1.262909               | -3.570771 | -1.476764 |
| 19               | 6                | 0              | -4.795464               | 1.578277  | -1.493368 |
| 20               | 6                | 0              | -5.243675               | 2.904063  | -1.429360 |
| 21               | 6                | 0              | -5.842837               | 3.403945  | -0.280289 |

|    |    |   |           |           |           |
|----|----|---|-----------|-----------|-----------|
| 22 | 6  | 0 | -6.013160 | 2.575710  | 0.824910  |
| 23 | 6  | 0 | -5.585835 | 1.239852  | 0.828378  |
| 24 | 7  | 0 | 1.724061  | 2.898423  | 1.091392  |
| 25 | 6  | 0 | 2.749618  | 2.107034  | 1.409627  |
| 26 | 7  | 0 | 3.979767  | 2.687024  | 1.404811  |
| 27 | 6  | 0 | 4.118416  | 4.117754  | 1.140076  |
| 28 | 6  | 0 | 5.226018  | 1.936678  | 1.310311  |
| 29 | 1  | 0 | 2.981094  | 0.145595  | 0.416454  |
| 30 | 6  | 0 | -1.351728 | -3.021394 | -2.906088 |
| 31 | 6  | 0 | -2.684162 | -3.289292 | -3.632727 |
| 32 | 6  | 0 | -0.926158 | -1.546792 | -3.024180 |
| 33 | 6  | 0 | 0.890428  | 4.745749  | -1.232865 |
| 34 | 16 | 0 | -0.010867 | 5.031087  | 0.297965  |
| 35 | 8  | 0 | 0.858052  | 5.674902  | 1.283906  |
| 36 | 8  | 0 | -1.281566 | 5.677956  | -0.049331 |
| 37 | 6  | 0 | -1.903429 | 3.231443  | 1.079735  |
| 38 | 6  | 0 | -5.827531 | 0.455493  | 2.124102  |
| 39 | 6  | 0 | -4.542632 | 0.251875  | 2.949204  |
| 40 | 6  | 0 | -6.617203 | -0.858579 | 1.975220  |
| 41 | 6  | 0 | -4.171408 | 1.075468  | -2.793097 |
| 42 | 6  | 0 | -5.202591 | 1.075929  | -3.939693 |
| 43 | 6  | 0 | -2.915819 | 1.882895  | -3.174762 |
| 44 | 6  | 0 | -2.911661 | -3.596005 | 2.048850  |
| 45 | 6  | 0 | -3.691550 | -4.870802 | 2.429333  |
| 46 | 6  | 0 | -2.170606 | -3.013993 | 3.267692  |
| 47 | 1  | 0 | 0.989966  | -0.797745 | 1.740920  |
| 48 | 1  | 0 | -6.334888 | -1.507979 | -1.148512 |
| 49 | 1  | 0 | -4.715857 | -3.760184 | -1.263904 |
| 50 | 1  | 0 | -0.748960 | -5.204534 | 2.039801  |
| 51 | 1  | 0 | 0.820754  | -5.705927 | 0.196403  |
| 52 | 1  | 0 | 0.487444  | -4.682307 | -2.021926 |
| 53 | 1  | 0 | -5.119415 | 3.548836  | -2.293561 |
| 54 | 1  | 0 | -6.182122 | 4.434944  | -0.245150 |
| 55 | 1  | 0 | -6.491100 | 2.969938  | 1.717291  |
| 56 | 1  | 0 | 4.989341  | 4.487851  | 1.690486  |
| 57 | 1  | 0 | 4.278826  | 4.301345  | 0.069559  |
| 58 | 1  | 0 | 3.223841  | 4.649682  | 1.458578  |
| 59 | 1  | 0 | 5.045825  | 0.868868  | 1.224662  |
| 60 | 1  | 0 | 5.768672  | 2.265217  | 0.416325  |
| 61 | 1  | 0 | 5.857255  | 2.107707  | 2.189997  |
| 62 | 1  | 0 | -0.598744 | -3.595181 | -3.458774 |
| 63 | 1  | 0 | -3.009606 | -4.328205 | -3.509039 |
| 64 | 1  | 0 | -2.553295 | -3.108998 | -4.705103 |
| 65 | 1  | 0 | -3.489634 | -2.634866 | -3.291086 |
| 66 | 1  | 0 | 0.088007  | -1.394284 | -2.648866 |
| 67 | 1  | 0 | -0.937212 | -1.241885 | -4.076834 |
| 68 | 1  | 0 | -1.592812 | -0.880883 | -2.471089 |
| 69 | 1  | 0 | 0.186115  | 4.342346  | -1.960452 |
| 70 | 1  | 0 | 1.246765  | 5.728374  | -1.548520 |
| 71 | 1  | 0 | 1.718074  | 4.061748  | -1.057894 |
| 72 | 1  | 0 | -2.445877 | 2.780249  | 0.245880  |
| 73 | 1  | 0 | -2.341539 | 4.205081  | 1.293303  |
| 74 | 1  | 0 | -1.990929 | 2.587621  | 1.955023  |
| 75 | 1  | 0 | -6.470054 | 1.115006  | 2.720134  |
| 76 | 1  | 0 | -4.785036 | -0.217843 | 3.909131  |
| 77 | 1  | 0 | -3.818377 | -0.381131 | 2.431700  |
| 78 | 1  | 0 | -4.053387 | 1.208463  | 3.156164  |
| 79 | 1  | 0 | -7.508845 | -0.722664 | 1.353795  |
| 80 | 1  | 0 | -6.950487 | -1.193506 | 2.963266  |

|     |    |   |           |           |           |
|-----|----|---|-----------|-----------|-----------|
| 81  | 1  | 0 | -6.018829 | -1.663646 | 1.543701  |
| 82  | 1  | 0 | -3.852544 | 0.040987  | -2.647846 |
| 83  | 1  | 0 | -6.080998 | 0.471823  | -3.689698 |
| 84  | 1  | 0 | -4.756260 | 0.664506  | -4.851059 |
| 85  | 1  | 0 | -5.549971 | 2.089212  | -4.167583 |
| 86  | 1  | 0 | -2.163815 | 1.838743  | -2.381301 |
| 87  | 1  | 0 | -2.467858 | 1.474771  | -4.086517 |
| 88  | 1  | 0 | -3.153280 | 2.935401  | -3.362261 |
| 89  | 1  | 0 | -3.647533 | -2.850425 | 1.737586  |
| 90  | 1  | 0 | -4.254375 | -5.265721 | 1.577051  |
| 91  | 1  | 0 | -4.401536 | -4.658084 | 3.235905  |
| 92  | 1  | 0 | -3.019300 | -5.661943 | 2.777754  |
| 93  | 1  | 0 | -1.432751 | -3.717893 | 3.666172  |
| 94  | 1  | 0 | -1.647070 | -2.089938 | 3.005044  |
| 95  | 1  | 0 | -2.881000 | -2.789419 | 4.070739  |
| 96  | 7  | 0 | 3.330208  | -0.331464 | -0.745164 |
| 97  | 16 | 0 | 3.163013  | 0.686937  | -2.061058 |
| 98  | 16 | 0 | 3.279467  | -1.999578 | -0.865924 |
| 99  | 8  | 0 | 2.188280  | 0.235477  | -3.045304 |
| 100 | 8  | 0 | 3.091870  | 2.033643  | -1.494065 |
| 101 | 8  | 0 | 3.013620  | -2.477297 | -2.218245 |
| 102 | 8  | 0 | 2.528740  | -2.495372 | 0.284103  |
| 103 | 6  | 0 | 5.070622  | -2.433946 | -0.510984 |
| 104 | 6  | 0 | 4.833556  | 0.629036  | -2.914970 |
| 105 | 9  | 0 | 5.504082  | -1.793985 | 0.578278  |
| 106 | 9  | 0 | 5.147072  | -3.750011 | -0.311134 |
| 107 | 9  | 0 | 5.841084  | -2.098405 | -1.547575 |
| 108 | 9  | 0 | 4.986227  | -0.510456 | -3.582823 |
| 109 | 9  | 0 | 5.812592  | 0.753309  | -2.012172 |
| 110 | 9  | 0 | 4.889183  | 1.654771  | -3.766284 |
| 111 | 6  | 0 | 3.282765  | 0.103940  | 2.882234  |
| 112 | 6  | 0 | 3.834580  | 0.783812  | 3.944808  |
| 113 | 16 | 0 | 3.425551  | -1.626048 | 3.150125  |
| 114 | 6  | 0 | 4.374500  | -0.062129 | 4.958060  |
| 115 | 1  | 0 | 3.837822  | 1.865890  | 4.004572  |
| 116 | 6  | 0 | 4.220471  | -1.388839 | 4.672465  |
| 117 | 1  | 0 | 4.845753  | 0.307700  | 5.861985  |
| 118 | 1  | 0 | 4.528204  | -2.244832 | 5.257125  |

Sum of electronic and zero-point Energies= -4738.682154  
Sum of electronic and thermal Energies= -4738.611707  
Sum of electronic and thermal Enthalpies= -4738.610763  
Sum of electronic and thermal Free Energies= -4738.797093

### C-tsb3

| Center Number | Atomic Number | Atomic Type | Coordinates (Angstroms) |           |           |
|---------------|---------------|-------------|-------------------------|-----------|-----------|
|               |               |             | X                       | Y         | Z         |
| 1             | 6             | 0           | 0.954113                | -0.427579 | -2.187001 |
| 2             | 6             | 0           | -0.355799               | -0.994054 | -2.110898 |
| 3             | 6             | 0           | 1.357466                | 0.647442  | -1.384656 |
| 4             | 7             | 0           | -0.733686               | -2.021089 | -2.912342 |
| 5             | 6             | 0           | 2.762014                | 0.860199  | -1.599454 |
| 6             | 79            | 0           | -1.643953               | -0.176282 | -0.674551 |
| 7             | 6             | 0           | -2.896230               | 0.673430  | 0.726136  |
| 8             | 7             | 0           | -3.777424               | 0.047061  | 1.562535  |
| 9             | 6             | 0           | -4.468868               | 0.976847  | 2.330134  |
| 10            | 6             | 0           | -4.031866               | 2.204331  | 1.951815  |

|    |    |   |           |           |           |
|----|----|---|-----------|-----------|-----------|
| 11 | 7  | 0 | -3.060196 | 2.005196  | 0.980094  |
| 12 | 6  | 0 | -3.965086 | -1.388782 | 1.684728  |
| 13 | 6  | 0 | -2.340042 | 3.081237  | 0.319299  |
| 14 | 6  | 0 | -2.750301 | 3.453276  | -0.981945 |
| 15 | 6  | 0 | -2.046074 | 4.479381  | -1.622476 |
| 16 | 6  | 0 | -0.979906 | 5.117676  | -1.001336 |
| 17 | 6  | 0 | -0.614107 | 4.747819  | 0.286884  |
| 18 | 6  | 0 | -1.279563 | 3.732238  | 0.990660  |
| 19 | 6  | 0 | -5.100826 | -2.001894 | 1.104693  |
| 20 | 6  | 0 | -5.232384 | -3.388887 | 1.277730  |
| 21 | 6  | 0 | -4.304353 | -4.136133 | 1.994373  |
| 22 | 6  | 0 | -3.207075 | -3.503006 | 2.565080  |
| 23 | 6  | 0 | -3.011999 | -2.122145 | 2.430290  |
| 24 | 7  | 0 | 2.025002  | -0.864450 | -2.983792 |
| 25 | 6  | 0 | 3.068316  | -0.128690 | -2.672037 |
| 26 | 7  | 0 | 4.290919  | -0.303324 | -3.282420 |
| 27 | 6  | 0 | 4.359930  | -1.352451 | -4.294919 |
| 28 | 6  | 0 | 5.516566  | -0.173226 | -2.492239 |
| 29 | 1  | 0 | 3.154893  | 0.050716  | -0.447320 |
| 30 | 6  | 0 | -0.798126 | 3.518474  | 2.432679  |
| 31 | 6  | 0 | -1.538960 | 4.466581  | 3.401690  |
| 32 | 6  | 0 | -0.767315 | 2.087246  | 2.984863  |
| 33 | 6  | 0 | -1.819932 | -1.484155 | 3.136952  |
| 34 | 6  | 0 | -2.037457 | -1.481686 | 4.664588  |
| 35 | 6  | 0 | -0.485038 | -2.157625 | 2.769984  |
| 36 | 6  | 0 | -6.257199 | -1.328195 | 0.352584  |
| 37 | 6  | 0 | -7.381015 | -0.902499 | 1.323009  |
| 38 | 6  | 0 | -5.912482 | -0.194414 | -0.623309 |
| 39 | 6  | 0 | -3.950634 | 2.837570  | -1.694008 |
| 40 | 6  | 0 | -5.115000 | 3.847512  | -1.761890 |
| 41 | 6  | 0 | -3.597839 | 2.303690  | -3.094629 |
| 42 | 6  | 0 | -2.220482 | -3.659848 | -1.230739 |
| 43 | 16 | 0 | -2.351347 | -2.721601 | -2.760599 |
| 44 | 8  | 0 | -2.468771 | -3.664740 | -3.871516 |
| 45 | 8  | 0 | -3.343599 | -1.654675 | -2.604642 |
| 46 | 6  | 0 | 0.053719  | -2.675940 | -3.989534 |
| 47 | 1  | 0 | 0.744512  | 1.193272  | -0.680976 |
| 48 | 1  | 0 | -5.193263 | 0.678813  | 3.069500  |
| 49 | 1  | 0 | -4.314168 | 3.190211  | 2.281600  |
| 50 | 1  | 0 | -2.341344 | 4.778205  | -2.623052 |
| 51 | 1  | 0 | -0.433950 | 5.901201  | -1.518284 |
| 52 | 1  | 0 | 0.217853  | 5.250610  | 0.770711  |
| 53 | 1  | 0 | -6.093655 | -3.884838 | 0.838278  |
| 54 | 1  | 0 | -4.439684 | -5.207788 | 2.110203  |
| 55 | 1  | 0 | -2.487343 | -4.082801 | 3.133467  |
| 56 | 1  | 0 | 3.527332  | -1.247118 | -4.991467 |
| 57 | 1  | 0 | 5.301888  | -1.245766 | -4.841062 |
| 58 | 1  | 0 | 4.313791  | -2.354902 | -3.847959 |
| 59 | 1  | 0 | 6.343897  | 0.108128  | -3.152170 |
| 60 | 1  | 0 | 5.409353  | 0.602363  | -1.736105 |
| 61 | 1  | 0 | 5.767344  | -1.117883 | -1.992196 |
| 62 | 1  | 0 | 0.246960  | 3.848531  | 2.416241  |
| 63 | 1  | 0 | -1.503048 | 5.503969  | 3.055356  |
| 64 | 1  | 0 | -1.080504 | 4.422680  | 4.395457  |
| 65 | 1  | 0 | -2.591591 | 4.185524  | 3.514080  |
| 66 | 1  | 0 | -0.295231 | 1.395590  | 2.285081  |
| 67 | 1  | 0 | -0.169010 | 2.076253  | 3.901587  |
| 68 | 1  | 0 | -1.763056 | 1.721559  | 3.246245  |
| 69 | 1  | 0 | -1.748555 | -0.445058 | 2.818094  |



|     |    |   |           |           |           |
|-----|----|---|-----------|-----------|-----------|
| 70  | 1  | 0 | -2.960718 | -0.960945 | 4.941120  |
| 71  | 1  | 0 | -1.201353 | -0.980552 | 5.162711  |
| 72  | 1  | 0 | -2.099025 | -2.501395 | 5.060134  |
| 73  | 1  | 0 | -0.310530 | -2.140913 | 1.690485  |
| 74  | 1  | 0 | 0.350264  | -1.635304 | 3.244057  |
| 75  | 1  | 0 | -0.444156 | -3.200694 | 3.101013  |
| 76  | 1  | 0 | -6.677334 | -2.133065 | -0.262665 |
| 77  | 1  | 0 | -7.675341 | -1.724343 | 1.982858  |
| 78  | 1  | 0 | -8.264549 | -0.586259 | 0.758177  |
| 79  | 1  | 0 | -7.074245 | -0.058521 | 1.948760  |
| 80  | 1  | 0 | -5.065257 | -0.453728 | -1.262008 |
| 81  | 1  | 0 | -6.777845 | -0.008656 | -1.268892 |
| 82  | 1  | 0 | -5.697697 | 0.741607  | -0.102762 |
| 83  | 1  | 0 | -4.295188 | 1.984086  | -1.111136 |
| 84  | 1  | 0 | -5.404509 | 4.195588  | -0.764593 |
| 85  | 1  | 0 | -5.992202 | 3.386549  | -2.228390 |
| 86  | 1  | 0 | -4.844817 | 4.727965  | -2.354900 |
| 87  | 1  | 0 | -2.792842 | 1.565506  | -3.043095 |
| 88  | 1  | 0 | -4.471789 | 1.816983  | -3.539619 |
| 89  | 1  | 0 | -3.285929 | 3.105594  | -3.772133 |
| 90  | 1  | 0 | -2.003999 | -2.980627 | -0.406663 |
| 91  | 1  | 0 | -3.187095 | -4.143947 | -1.082877 |
| 92  | 1  | 0 | -1.429456 | -4.400197 | -1.356463 |
| 93  | 1  | 0 | -0.413242 | -2.475707 | -4.955685 |
| 94  | 1  | 0 | 0.072911  | -3.755178 | -3.828470 |
| 95  | 1  | 0 | 1.059095  | -2.262534 | -3.945271 |
| 96  | 7  | 0 | 3.500442  | -0.667198 | 0.604008  |
| 97  | 16 | 0 | 3.169895  | 0.072169  | 2.058988  |
| 98  | 16 | 0 | 3.572911  | -2.330801 | 0.419449  |
| 99  | 8  | 0 | 2.244475  | 1.174483  | 1.793271  |
| 100 | 8  | 0 | 2.935913  | -0.858344 | 3.158952  |
| 101 | 8  | 0 | 3.769151  | -2.553867 | -1.010000 |
| 102 | 8  | 0 | 2.540626  | -3.047162 | 1.160180  |
| 103 | 6  | 0 | 5.211958  | -2.813542 | 1.197086  |
| 104 | 6  | 0 | 4.822035  | 0.884922  | 2.422035  |
| 105 | 9  | 0 | 5.473352  | -4.072046 | 0.837667  |
| 106 | 9  | 0 | 6.181900  | -2.015051 | 0.739427  |
| 107 | 9  | 0 | 5.161783  | -2.734680 | 2.523907  |
| 108 | 9  | 0 | 5.711678  | -0.039231 | 2.790712  |
| 109 | 9  | 0 | 4.649380  | 1.754270  | 3.419608  |
| 110 | 9  | 0 | 5.280440  | 1.526784  | 1.346794  |
| 111 | 6  | 0 | 3.376156  | 2.215241  | -1.566346 |
| 112 | 6  | 0 | 4.152829  | 2.802941  | -2.539981 |
| 113 | 16 | 0 | 3.067860  | 3.369483  | -0.279121 |
| 114 | 6  | 0 | 4.503300  | 4.157121  | -2.262122 |
| 115 | 1  | 0 | 4.440838  | 2.275608  | -3.441056 |
| 116 | 6  | 0 | 3.982000  | 4.605394  | -1.081808 |
| 117 | 1  | 0 | 5.112272  | 4.767198  | -2.920179 |
| 118 | 1  | 0 | 4.092313  | 5.578479  | -0.623059 |

---

Sum of electronic and zero-point Energies= -4738.664479  
Sum of electronic and thermal Energies= -4738.594299  
Sum of electronic and thermal Enthalpies= -4738.593354  
Sum of electronic and thermal Free Energies= -4738.777628

### C-a3

---

| Center<br>Number | Atomic<br>Number | Atomic<br>Type | Coordinates (Angstroms) |   |   |
|------------------|------------------|----------------|-------------------------|---|---|
|                  |                  |                | X                       | Y | Z |

|    |    |   |           |           |           |
|----|----|---|-----------|-----------|-----------|
| 1  | 6  | 0 | 1.720823  | -0.292617 | 0.215117  |
| 2  | 6  | 0 | 2.296626  | -1.558099 | 0.025810  |
| 3  | 6  | 0 | 2.668094  | 0.731465  | 0.391285  |
| 4  | 7  | 0 | 1.426499  | -2.699144 | -0.151441 |
| 5  | 6  | 0 | 4.055196  | 0.520623  | 0.368232  |
| 6  | 79 | 0 | -0.299162 | 0.097254  | 0.129688  |
| 7  | 6  | 0 | -2.317191 | 0.554997  | 0.019844  |
| 8  | 7  | 0 | -3.389082 | -0.245188 | 0.303222  |
| 9  | 6  | 0 | -4.585520 | 0.439050  | 0.111104  |
| 10 | 6  | 0 | -4.262406 | 1.680004  | -0.325647 |
| 11 | 7  | 0 | -2.872757 | 1.745490  | -0.360755 |
| 12 | 6  | 0 | -3.315884 | -1.576902 | 0.875800  |
| 13 | 6  | 0 | -2.144640 | 2.885803  | -0.886419 |
| 14 | 6  | 0 | -1.837392 | 2.877467  | -2.264163 |
| 15 | 6  | 0 | -1.152953 | 3.980309  | -2.791026 |
| 16 | 6  | 0 | -0.794486 | 5.053809  | -1.986605 |
| 17 | 6  | 0 | -1.122136 | 5.041882  | -0.634369 |
| 18 | 6  | 0 | -1.802226 | 3.968215  | -0.042426 |
| 19 | 6  | 0 | -3.180624 | -1.668773 | 2.278357  |
| 20 | 6  | 0 | -3.117987 | -2.945612 | 2.850346  |
| 21 | 6  | 0 | -3.192909 | -4.087494 | 2.062603  |
| 22 | 6  | 0 | -3.344307 | -3.967320 | 0.684797  |
| 23 | 6  | 0 | -3.415881 | -2.719480 | 0.048079  |
| 24 | 7  | 0 | 3.609456  | -1.820765 | 0.048303  |
| 25 | 6  | 0 | 4.486844  | -0.825825 | 0.212594  |
| 26 | 7  | 0 | 5.860497  | -1.165064 | 0.199271  |
| 27 | 6  | 0 | 6.194725  | -2.456109 | -0.386373 |
| 28 | 6  | 0 | 6.591079  | -0.925731 | 1.445933  |
| 29 | 6  | 0 | -2.064372 | 4.083742  | 1.464260  |
| 30 | 6  | 0 | -3.533846 | 3.947551  | 1.905207  |
| 31 | 6  | 0 | -1.136126 | 3.182199  | 2.300359  |
| 32 | 6  | 0 | 3.022718  | -4.778555 | -1.155378 |
| 33 | 16 | 0 | 1.634151  | -3.675800 | -1.501344 |
| 34 | 8  | 0 | 2.014697  | -2.805183 | -2.614376 |
| 35 | 8  | 0 | 0.437580  | -4.528079 | -1.585866 |
| 36 | 6  | 0 | 0.895757  | -3.322182 | 1.066886  |
| 37 | 6  | 0 | -3.582480 | -2.743365 | -1.476236 |
| 38 | 6  | 0 | -2.315121 | -2.308493 | -2.234239 |
| 39 | 6  | 0 | -4.842202 | -2.033679 | -2.010121 |
| 40 | 6  | 0 | -3.123293 | -0.449674 | 3.195931  |
| 41 | 6  | 0 | -4.348524 | -0.399225 | 4.130829  |
| 42 | 6  | 0 | -1.808729 | -0.399793 | 3.997816  |
| 43 | 6  | 0 | -2.221049 | 1.736389  | -3.202591 |
| 44 | 6  | 0 | -3.215688 | 2.211385  | -4.280897 |
| 45 | 6  | 0 | -0.978030 | 1.083399  | -3.837764 |
| 46 | 1  | 0 | 2.318932  | 1.755945  | 0.487522  |
| 47 | 1  | 0 | -5.541474 | -0.022508 | 0.295356  |
| 48 | 1  | 0 | -4.879437 | 2.517726  | -0.605773 |
| 49 | 1  | 0 | -0.900372 | 3.991629  | -3.846573 |
| 50 | 1  | 0 | -0.263686 | 5.901557  | -2.410035 |
| 51 | 1  | 0 | -0.841521 | 5.885829  | -0.010515 |
| 52 | 1  | 0 | -3.012309 | -3.040612 | 3.926693  |
| 53 | 1  | 0 | -3.141173 | -5.071617 | 2.519612  |
| 54 | 1  | 0 | -3.404792 | -4.863462 | 0.074476  |
| 55 | 1  | 0 | 7.278602  | -2.492943 | -0.540658 |
| 56 | 1  | 0 | 5.908062  | -3.310679 | 0.247702  |
| 57 | 1  | 0 | 5.699830  | -2.564895 | -1.353053 |
| 58 | 1  | 0 | 6.343457  | 0.052489  | 1.856253  |

|     |    |   |           |           |           |
|-----|----|---|-----------|-----------|-----------|
| 59  | 1  | 0 | 6.368315  | -1.694266 | 2.205557  |
| 60  | 1  | 0 | 7.667763  | -0.945342 | 1.246319  |
| 61  | 1  | 0 | -1.783508 | 5.116035  | 1.706398  |
| 62  | 1  | 0 | -4.197424 | 4.558841  | 1.284030  |
| 63  | 1  | 0 | -3.634983 | 4.295495  | 2.938906  |
| 64  | 1  | 0 | -3.890237 | 2.915850  | 1.872990  |
| 65  | 1  | 0 | -0.085666 | 3.373198  | 2.062123  |
| 66  | 1  | 0 | -1.284196 | 3.380839  | 3.368079  |
| 67  | 1  | 0 | -1.322733 | 2.121260  | 2.119817  |
| 68  | 1  | 0 | 2.759796  | -5.416754 | -0.310148 |
| 69  | 1  | 0 | 3.182559  | -5.384085 | -2.049319 |
| 70  | 1  | 0 | 3.886184  | -4.157927 | -0.923129 |
| 71  | 1  | 0 | 0.409002  | -2.543232 | 1.657734  |
| 72  | 1  | 0 | 1.684756  | -3.789590 | 1.674168  |
| 73  | 1  | 0 | 0.147410  | -4.065294 | 0.790875  |
| 74  | 1  | 0 | -3.724904 | -3.804760 | -1.712058 |
| 75  | 1  | 0 | -2.472628 | -2.428118 | -3.312322 |
| 76  | 1  | 0 | -2.061590 | -1.263173 | -2.044098 |
| 77  | 1  | 0 | -1.455893 | -2.920596 | -1.950714 |
| 78  | 1  | 0 | -5.735387 | -2.308407 | -1.437706 |
| 79  | 1  | 0 | -5.010304 | -2.333048 | -3.050124 |
| 80  | 1  | 0 | -4.748000 | -0.945420 | -1.998432 |
| 81  | 1  | 0 | -3.153357 | 0.450589  | 2.577939  |
| 82  | 1  | 0 | -5.285303 | -0.395657 | 3.563902  |
| 83  | 1  | 0 | -4.320858 | 0.506423  | 4.746211  |
| 84  | 1  | 0 | -4.373453 | -1.259989 | 4.807495  |
| 85  | 1  | 0 | -0.942515 | -0.387392 | 3.329416  |
| 86  | 1  | 0 | -1.776478 | 0.504295  | 4.615284  |
| 87  | 1  | 0 | -1.711330 | -1.261030 | 4.667420  |
| 88  | 1  | 0 | -2.726104 | 0.962842  | -2.619803 |
| 89  | 1  | 0 | -4.118063 | 2.642494  | -3.834361 |
| 90  | 1  | 0 | -3.518534 | 1.369960  | -4.912933 |
| 91  | 1  | 0 | -2.771223 | 2.971622  | -4.932056 |
| 92  | 1  | 0 | -0.431313 | 1.790416  | -4.470910 |
| 93  | 1  | 0 | -0.290836 | 0.711791  | -3.072161 |
| 94  | 1  | 0 | -1.275537 | 0.237042  | -4.465326 |
| 95  | 6  | 0 | 4.972418  | 1.669892  | 0.434357  |
| 96  | 6  | 0 | 6.159094  | 1.890401  | -0.228770 |
| 97  | 16 | 0 | 4.573674  | 3.073082  | 1.418142  |
| 98  | 6  | 0 | 6.735125  | 3.167451  | 0.032020  |
| 99  | 1  | 0 | 6.594547  | 1.146564  | -0.883699 |
| 100 | 6  | 0 | 5.995004  | 3.920208  | 0.902252  |
| 101 | 1  | 0 | 7.662269  | 3.510670  | -0.413833 |
| 102 | 1  | 0 | 6.198697  | 4.914722  | 1.274293  |

Sum of electronic and zero-point Energies= -2911.076114  
Sum of electronic and thermal Energies= -2911.022076  
Sum of electronic and thermal Enthalpies= -2911.021132  
Sum of electronic and thermal Free Energies= -2911.169990

### C-b3

| Center Number | Atomic Number | Atomic Type | Coordinates (Angstroms) |          |           |
|---------------|---------------|-------------|-------------------------|----------|-----------|
|               |               |             | X                       | Y        | Z         |
| 1             | 6             | 0           | 2.272132                | 1.724116 | 0.065906  |
| 2             | 6             | 0           | 0.913575                | 1.992112 | -0.037896 |
| 3             | 6             | 0           | 2.857742                | 0.401751 | 0.098173  |
| 4             | 7             | 0           | 0.466358                | 3.322766 | 0.046042  |

|    |    |   |           |           |           |
|----|----|---|-----------|-----------|-----------|
| 5  | 6  | 0 | 4.222182  | 0.553873  | 0.189294  |
| 6  | 79 | 0 | -0.472309 | 0.439366  | -0.058836 |
| 7  | 6  | 0 | -1.814529 | -1.132338 | 0.077396  |
| 8  | 7  | 0 | -3.066500 | -1.122229 | 0.630237  |
| 9  | 6  | 0 | -3.647295 | -2.384589 | 0.568307  |
| 10 | 6  | 0 | -2.743010 | -3.207010 | -0.013830 |
| 11 | 7  | 0 | -1.632555 | -2.428033 | -0.322374 |
| 12 | 6  | 0 | -3.799393 | 0.046321  | 1.086633  |
| 13 | 6  | 0 | -0.404928 | -2.995285 | -0.845422 |
| 14 | 6  | 0 | 0.516723  | -3.508261 | 0.093343  |
| 15 | 6  | 0 | 1.691757  | -4.093174 | -0.394519 |
| 16 | 6  | 0 | 1.941194  | -4.169941 | -1.759005 |
| 17 | 6  | 0 | 1.008105  | -3.670027 | -2.661470 |
| 18 | 6  | 0 | -0.189698 | -3.075026 | -2.240292 |
| 19 | 6  | 0 | -3.743082 | 0.444680  | 2.441506  |
| 20 | 6  | 0 | -4.504338 | 1.566346  | 2.800616  |
| 21 | 6  | 0 | -5.291809 | 2.250144  | 1.880733  |
| 22 | 6  | 0 | -5.347413 | 1.815934  | 0.562881  |
| 23 | 6  | 0 | -4.606360 | 0.708482  | 0.135663  |
| 24 | 7  | 0 | 3.299466  | 2.681325  | 0.106187  |
| 25 | 6  | 0 | 4.429362  | 2.012154  | 0.161516  |
| 26 | 7  | 0 | 5.668208  | 2.657917  | 0.225969  |
| 27 | 6  | 0 | 5.602483  | 4.097866  | 0.449579  |
| 28 | 6  | 0 | 6.646875  | 2.302832  | -0.804160 |
| 29 | 6  | 0 | -1.124573 | -2.573073 | -3.347386 |
| 30 | 6  | 0 | -2.556283 | -3.140543 | -3.314288 |
| 31 | 6  | 0 | -1.126936 | -1.039001 | -3.490492 |
| 32 | 6  | 0 | -4.738980 | 0.238248  | -1.311449 |
| 33 | 6  | 0 | -6.069948 | -0.514641 | -1.519780 |
| 34 | 6  | 0 | -4.600580 | 1.388506  | -2.325870 |
| 35 | 6  | 0 | -2.943254 | -0.217279 | 3.570867  |
| 36 | 6  | 0 | -3.206104 | -1.721084 | 3.776063  |
| 37 | 6  | 0 | -1.435196 | 0.090946  | 3.515807  |
| 38 | 6  | 0 | 0.270492  | -3.488668 | 1.600795  |
| 39 | 6  | 0 | 0.020888  | -4.915239 | 2.132205  |
| 40 | 6  | 0 | 1.414573  | -2.805711 | 2.373198  |
| 41 | 6  | 0 | -0.301431 | 3.596684  | -2.583689 |
| 42 | 16 | 0 | -0.880597 | 3.801983  | -0.886245 |
| 43 | 8  | 0 | -1.079087 | 5.233737  | -0.642541 |
| 44 | 8  | 0 | -2.004993 | 2.877789  | -0.691346 |
| 45 | 6  | 0 | 1.206764  | 4.424303  | 0.700504  |
| 46 | 1  | 0 | 2.304049  | -0.527566 | 0.090045  |
| 47 | 1  | 0 | -4.636552 | -2.573039 | 0.951137  |
| 48 | 1  | 0 | -2.781451 | -4.258973 | -0.243836 |
| 49 | 1  | 0 | 2.419562  | -4.487748 | 0.306583  |
| 50 | 1  | 0 | 2.859738  | -4.621756 | -2.121267 |
| 51 | 1  | 0 | 1.206061  | -3.741072 | -3.727278 |
| 52 | 1  | 0 | -4.476087 | 1.903299  | 3.833040  |
| 53 | 1  | 0 | -5.866750 | 3.116283  | 2.195107  |
| 54 | 1  | 0 | -5.969660 | 2.345954  | -0.150383 |
| 55 | 1  | 0 | 4.937023  | 4.309739  | 1.287229  |
| 56 | 1  | 0 | 6.608623  | 4.460536  | 0.684823  |
| 57 | 1  | 0 | 5.225681  | 4.647323  | -0.427159 |
| 58 | 1  | 0 | 7.640956  | 2.641039  | -0.492922 |
| 59 | 1  | 0 | 6.682401  | 1.223559  | -0.944521 |
| 60 | 1  | 0 | 6.410383  | 2.776250  | -1.771889 |
| 61 | 1  | 0 | -0.678013 | -2.962026 | -4.270733 |
| 62 | 1  | 0 | -2.552708 | -4.228462 | -3.187025 |
| 63 | 1  | 0 | -3.056138 | -2.919665 | -4.263551 |

|     |    |   |           |           |           |
|-----|----|---|-----------|-----------|-----------|
| 64  | 1  | 0 | -3.163791 | -2.705622 | -2.517827 |
| 65  | 1  | 0 | -0.108080 | -0.655713 | -3.601346 |
| 66  | 1  | 0 | -1.700534 | -0.749596 | -4.378628 |
| 67  | 1  | 0 | -1.569642 | -0.545834 | -2.622009 |
| 68  | 1  | 0 | -3.927381 | -0.464079 | -1.518226 |
| 69  | 1  | 0 | -6.159438 | -1.378454 | -0.853053 |
| 70  | 1  | 0 | -6.149255 | -0.875072 | -2.551283 |
| 71  | 1  | 0 | -6.924875 | 0.142816  | -1.327456 |
| 72  | 1  | 0 | -3.690589 | 1.963430  | -2.142063 |
| 73  | 1  | 0 | -4.568795 | 0.982170  | -3.342932 |
| 74  | 1  | 0 | -5.452575 | 2.075485  | -2.280244 |
| 75  | 1  | 0 | -3.316892 | 0.268981  | 4.480410  |
| 76  | 1  | 0 | -4.278902 | -1.941724 | 3.796023  |
| 77  | 1  | 0 | -2.785293 | -2.035075 | 4.737397  |
| 78  | 1  | 0 | -2.745307 | -2.339160 | 3.002412  |
| 79  | 1  | 0 | -1.256214 | 1.167792  | 3.447452  |
| 80  | 1  | 0 | -0.946175 | -0.279799 | 4.424092  |
| 81  | 1  | 0 | -0.950093 | -0.373954 | 2.654340  |
| 82  | 1  | 0 | -0.633448 | -2.906758 | 1.795168  |
| 83  | 1  | 0 | -0.822452 | -5.393691 | 1.623212  |
| 84  | 1  | 0 | -0.201086 | -4.889548 | 3.204411  |
| 85  | 1  | 0 | 0.900175  | -5.552304 | 1.988484  |
| 86  | 1  | 0 | 1.568064  | -1.778540 | 2.032090  |
| 87  | 1  | 0 | 1.177258  | -2.776634 | 3.442065  |
| 88  | 1  | 0 | 2.362405  | -3.341529 | 2.260520  |
| 89  | 1  | 0 | -0.040477 | 2.549646  | -2.738669 |
| 90  | 1  | 0 | -1.121575 | 3.897044  | -3.238380 |
| 91  | 1  | 0 | 0.565784  | 4.241405  | -2.731705 |
| 92  | 1  | 0 | 1.718905  | 3.997057  | 1.560672  |
| 93  | 1  | 0 | 0.487565  | 5.175276  | 1.023598  |
| 94  | 1  | 0 | 1.958600  | 4.869165  | 0.046924  |
| 95  | 6  | 0 | 5.226193  | -0.480684 | 0.387212  |
| 96  | 6  | 0 | 6.406703  | -0.417616 | 1.097721  |
| 97  | 16 | 0 | 5.017571  | -2.098155 | -0.271134 |
| 98  | 6  | 0 | 7.128879  | -1.646468 | 1.126070  |
| 99  | 1  | 0 | 6.724787  | 0.490371  | 1.595905  |
| 100 | 6  | 0 | 6.505286  | -2.649259 | 0.436460  |
| 101 | 1  | 0 | 8.071927  | -1.777446 | 1.645636  |
| 102 | 1  | 0 | 6.828291  | -3.671676 | 0.297020  |

Sum of electronic and zero-point Energies= -2911.048988  
Sum of electronic and thermal Energies= -2910.994575  
Sum of electronic and thermal Enthalpies= -2910.993630  
Sum of electronic and thermal Free Energies= -2911.144361

#### C-tsa4

| Center<br>Number | Atomic<br>Number | Atomic<br>Type | Coordinates (Angstroms) |           |           |
|------------------|------------------|----------------|-------------------------|-----------|-----------|
|                  |                  |                | X                       | Y         | Z         |
| 1                | 6                | 0              | 1.045373                | 0.407175  | -0.498913 |
| 2                | 6                | 0              | 1.563419                | 1.628480  | -1.061015 |
| 3                | 6                | 0              | 1.715677                | -0.743812 | -1.012409 |
| 4                | 7                | 0              | 1.111684                | 2.892696  | -0.663314 |
| 5                | 6                | 0              | 2.755485                | -0.732833 | -1.932890 |
| 6                | 79               | 0              | -1.039860               | 0.029505  | -0.256171 |
| 7                | 6                | 0              | -3.060247               | -0.353882 | -0.175354 |
| 8                | 7                | 0              | -4.034361               | 0.475957  | 0.304911  |
| 9                | 6                | 0              | -5.293943               | -0.090486 | 0.140422  |

|    |    |   |           |           |           |
|----|----|---|-----------|-----------|-----------|
| 10 | 6  | 0 | -5.106812 | -1.302874 | -0.432919 |
| 11 | 7  | 0 | -3.737675 | -1.450408 | -0.632709 |
| 12 | 6  | 0 | -3.837413 | 1.834861  | 0.775114  |
| 13 | 6  | 0 | -3.136639 | -2.679076 | -1.121562 |
| 14 | 6  | 0 | -2.879000 | -3.691955 | -0.169549 |
| 15 | 6  | 0 | -2.294403 | -4.880463 | -0.623290 |
| 16 | 6  | 0 | -1.986995 | -5.062563 | -1.965986 |
| 17 | 6  | 0 | -2.285230 | -4.062561 | -2.885415 |
| 18 | 6  | 0 | -2.874532 | -2.849146 | -2.500382 |
| 19 | 6  | 0 | -3.923087 | 2.865048  | -0.187978 |
| 20 | 6  | 0 | -3.756712 | 4.185560  | 0.246690  |
| 21 | 6  | 0 | -3.512337 | 4.473500  | 1.583987  |
| 22 | 6  | 0 | -3.448744 | 3.439668  | 2.512626  |
| 23 | 6  | 0 | -3.615954 | 2.095514  | 2.146895  |
| 24 | 7  | 0 | 2.494433  | 1.663366  | -2.019941 |
| 25 | 6  | 0 | 3.094692  | 0.551915  | -2.465059 |
| 26 | 7  | 0 | 4.069985  | 0.737432  | -3.422574 |
| 27 | 6  | 0 | 4.599647  | 2.075258  | -3.656905 |
| 28 | 6  | 0 | 4.239981  | -0.165932 | -4.555042 |
| 29 | 6  | 0 | -3.178439 | -1.859708 | -3.633390 |
| 30 | 6  | 0 | -4.634081 | -1.361348 | -3.703492 |
| 31 | 6  | 0 | -2.177882 | -0.691806 | -3.718630 |
| 32 | 6  | 0 | 1.593079  | 4.444278  | -2.928634 |
| 33 | 16 | 0 | 1.953626  | 4.327922  | -1.167569 |
| 34 | 8  | 0 | 3.395419  | 4.186260  | -0.970666 |
| 35 | 8  | 0 | 1.244460  | 5.436555  | -0.520780 |
| 36 | 6  | 0 | 0.012836  | 3.070547  | 0.295151  |
| 37 | 6  | 0 | -3.526477 | 1.068522  | 3.282592  |
| 38 | 6  | 0 | -2.175979 | 0.327535  | 3.322106  |
| 39 | 6  | 0 | -4.712807 | 0.092724  | 3.392639  |
| 40 | 6  | 0 | -4.209300 | 2.605677  | -1.666042 |
| 41 | 6  | 0 | -5.594392 | 3.153138  | -2.065858 |
| 42 | 6  | 0 | -3.106815 | 3.176739  | -2.578532 |
| 43 | 6  | 0 | -3.273925 | -3.567142 | 1.301194  |
| 44 | 6  | 0 | -4.618311 | -4.283235 | 1.556716  |
| 45 | 6  | 0 | -2.197940 | -4.092422 | 2.267935  |
| 46 | 1  | 0 | 1.449119  | -1.703140 | -0.581841 |
| 47 | 1  | 0 | -6.190786 | 0.417337  | 0.454795  |
| 48 | 1  | 0 | -5.808846 | -2.066029 | -0.724650 |
| 49 | 1  | 0 | -2.078757 | -5.670327 | 0.087757  |
| 50 | 1  | 0 | -1.530511 | -5.989828 | -2.300138 |
| 51 | 1  | 0 | -2.065992 | -4.222049 | -3.937525 |
| 52 | 1  | 0 | -3.816967 | 4.995097  | -0.473963 |
| 53 | 1  | 0 | -3.377758 | 5.501889  | 1.905798  |
| 54 | 1  | 0 | -3.265017 | 3.672820  | 3.557336  |
| 55 | 1  | 0 | 5.637789  | 1.980263  | -3.993962 |
| 56 | 1  | 0 | 4.039705  | 2.609603  | -4.440160 |
| 57 | 1  | 0 | 4.562777  | 2.663926  | -2.741615 |
| 58 | 1  | 0 | 3.689862  | -1.091909 | -4.406358 |
| 59 | 1  | 0 | 3.869993  | 0.315615  | -5.472743 |
| 60 | 1  | 0 | 5.297732  | -0.412287 | -4.699578 |
| 61 | 1  | 0 | -3.029821 | -2.449676 | -4.546136 |
| 62 | 1  | 0 | -5.345588 | -2.189900 | -3.621308 |
| 63 | 1  | 0 | -4.804303 | -0.873225 | -4.669127 |
| 64 | 1  | 0 | -4.868212 | -0.632287 | -2.924761 |
| 65 | 1  | 0 | -1.147460 | -1.057399 | -3.755123 |
| 66 | 1  | 0 | -2.365202 | -0.108188 | -4.627441 |
| 67 | 1  | 0 | -2.255028 | -0.021010 | -2.859896 |
| 68 | 1  | 0 | 0.514759  | 4.558547  | -3.043490 |

|     |    |   |           |           |           |
|-----|----|---|-----------|-----------|-----------|
| 69  | 1  | 0 | 2.111488  | 5.336644  | -3.285198 |
| 70  | 1  | 0 | 1.961770  | 3.544523  | -3.414644 |
| 71  | 1  | 0 | -0.914230 | 2.666133  | -0.119861 |
| 72  | 1  | 0 | -0.108852 | 4.134853  | 0.479856  |
| 73  | 1  | 0 | 0.240664  | 2.578560  | 1.239067  |
| 74  | 1  | 0 | -3.564025 | 1.677191  | 4.194158  |
| 75  | 1  | 0 | -2.108308 | -0.282508 | 4.228866  |
| 76  | 1  | 0 | -2.047162 | -0.334522 | 2.462102  |
| 77  | 1  | 0 | -1.338742 | 1.031041  | 3.329214  |
| 78  | 1  | 0 | -5.673248 | 0.616861  | 3.336325  |
| 79  | 1  | 0 | -4.669840 | -0.417350 | 4.360570  |
| 80  | 1  | 0 | -4.698126 | -0.678714 | 2.619613  |
| 81  | 1  | 0 | -4.227663 | 1.525874  | -1.831429 |
| 82  | 1  | 0 | -6.390070 | 2.717319  | -1.453007 |
| 83  | 1  | 0 | -5.809166 | 2.921816  | -3.114651 |
| 84  | 1  | 0 | -5.642835 | 4.240701  | -1.947033 |
| 85  | 1  | 0 | -2.128144 | 2.759391  | -2.323640 |
| 86  | 1  | 0 | -3.319841 | 2.931037  | -3.624402 |
| 87  | 1  | 0 | -3.041125 | 4.267051  | -2.502089 |
| 88  | 1  | 0 | -3.412738 | -2.506711 | 1.528503  |
| 89  | 1  | 0 | -5.423092 | -3.890074 | 0.927601  |
| 90  | 1  | 0 | -4.919695 | -4.164614 | 2.602877  |
| 91  | 1  | 0 | -4.531077 | -5.355903 | 1.351823  |
| 92  | 1  | 0 | -2.085565 | -5.180111 | 2.201319  |
| 93  | 1  | 0 | -1.227735 | -3.630079 | 2.077929  |
| 94  | 1  | 0 | -2.489225 | -3.863950 | 3.298324  |
| 95  | 1  | 0 | 1.277616  | 0.216562  | 0.983635  |
| 96  | 7  | 0 | 1.661225  | -0.090962 | 2.155010  |
| 97  | 16 | 0 | 2.284745  | 1.074864  | 3.188178  |
| 98  | 16 | 0 | 1.377005  | -1.660947 | 2.631923  |
| 99  | 8  | 0 | 1.473481  | 2.283176  | 3.058233  |
| 100 | 8  | 0 | 2.635758  | 0.528566  | 4.492126  |
| 101 | 8  | 0 | 0.897185  | -1.777600 | 4.001733  |
| 102 | 8  | 0 | 0.637200  | -2.274242 | 1.525573  |
| 103 | 6  | 0 | 3.904060  | 1.460353  | 2.328807  |
| 104 | 6  | 0 | 3.064336  | -2.483214 | 2.572676  |
| 105 | 9  | 0 | 2.883967  | -3.796952 | 2.728827  |
| 106 | 9  | 0 | 3.631885  | -2.252511 | 1.386377  |
| 107 | 9  | 0 | 3.853054  | -2.025255 | 3.540396  |
| 108 | 9  | 0 | 3.675251  | 1.912315  | 1.096431  |
| 109 | 9  | 0 | 4.656280  | 0.359029  | 2.263524  |
| 110 | 9  | 0 | 4.539701  | 2.391804  | 3.037309  |
| 111 | 6  | 0 | 3.477112  | -1.990722 | -2.197266 |
| 112 | 6  | 0 | 2.944429  | -3.213802 | -2.532579 |
| 113 | 16 | 0 | 5.207001  | -2.145447 | -1.926061 |
| 114 | 6  | 0 | 3.907755  | -4.266073 | -2.588582 |
| 115 | 1  | 0 | 1.887985  | -3.348410 | -2.738252 |
| 116 | 6  | 0 | 5.172211  | -3.841263 | -2.291009 |
| 117 | 1  | 0 | 3.666929  | -5.291288 | -2.846581 |
| 118 | 1  | 0 | 6.086982  | -4.417515 | -2.269293 |

---

Sum of electronic and zero-point Energies= -4738.693323  
Sum of electronic and thermal Energies= -4738.623014  
Sum of electronic and thermal Enthalpies= -4738.622070  
Sum of electronic and thermal Free Energies= -4738.808726

### C-tsb4

---

| Center | Atomic | Atomic | Coordinates (Angstroms) |  |  |
|--------|--------|--------|-------------------------|--|--|
|--------|--------|--------|-------------------------|--|--|

| Number | Number | Type | X         | Y         | Z         |
|--------|--------|------|-----------|-----------|-----------|
| 1      | 6      | 0    | -2.065939 | -0.023571 | 1.028912  |
| 2      | 6      | 0    | -0.906447 | 0.742393  | 1.079073  |
| 3      | 6      | 0    | -2.383689 | -0.914504 | -0.089545 |
| 4      | 7      | 0    | -0.607558 | 1.532743  | 2.231737  |
| 5      | 6      | 0    | -3.564176 | -1.526953 | 0.193679  |
| 6      | 79     | 0    | 0.798023  | -0.303777 | 0.273981  |
| 7      | 6      | 0    | 2.417718  | -1.442470 | -0.273455 |
| 8      | 7      | 0    | 3.743820  | -1.129213 | -0.194597 |
| 9      | 6      | 0    | 4.522719  | -2.169712 | -0.686577 |
| 10     | 6      | 0    | 3.670816  | -3.147612 | -1.083351 |
| 11     | 7      | 0    | 2.384598  | -2.700130 | -0.803875 |
| 12     | 6      | 0    | 4.278106  | 0.086142  | 0.393723  |
| 13     | 6      | 0    | 1.181278  | -3.450669 | -1.121220 |
| 14     | 6      | 0    | 0.611880  | -3.258709 | -2.399439 |
| 15     | 6      | 0    | -0.553719 | -3.968744 | -2.712560 |
| 16     | 6      | 0    | -1.129657 | -4.842667 | -1.799390 |
| 17     | 6      | 0    | -0.532695 | -5.030593 | -0.557622 |
| 18     | 6      | 0    | 0.632622  | -4.349435 | -0.176387 |
| 19     | 6      | 0    | 4.693196  | 1.150107  | -0.433959 |
| 20     | 6      | 0    | 5.157980  | 2.307567  | 0.211106  |
| 21     | 6      | 0    | 5.227235  | 2.402503  | 1.594572  |
| 22     | 6      | 0    | 4.847498  | 1.320510  | 2.382742  |
| 23     | 6      | 0    | 4.371310  | 0.138871  | 1.805846  |
| 24     | 7      | 0    | -3.088737 | -0.067240 | 1.962292  |
| 25     | 6      | 0    | -3.983399 | -0.922354 | 1.493835  |
| 26     | 7      | 0    | -5.126115 | -1.206300 | 2.185983  |
| 27     | 6      | 0    | -5.249518 | -0.662130 | 3.533227  |
| 28     | 6      | 0    | -6.405018 | -1.430515 | 1.514813  |
| 29     | 6      | 0    | 1.136668  | -4.638026 | 1.243789  |
| 30     | 6      | 0    | 2.636303  | -4.948586 | 1.396306  |
| 31     | 6      | 0    | 0.674439  | -3.568995 | 2.253671  |
| 32     | 6      | 0    | 4.054883  | -1.062128 | 2.695752  |
| 33     | 6      | 0    | 5.325407  | -1.916504 | 2.902577  |
| 34     | 6      | 0    | 3.443067  | -0.684166 | 4.055596  |
| 35     | 6      | 0    | 4.788480  | 1.172191  | -1.965069 |
| 36     | 6      | 0    | 6.195289  | 0.719410  | -2.416249 |
| 37     | 6      | 0    | 3.703135  | 0.455001  | -2.779633 |
| 38     | 6      | 0    | 1.204271  | -2.323093 | -3.448662 |
| 39     | 6      | 0    | 1.646863  | -3.099018 | -4.705313 |
| 40     | 6      | 0    | 0.231536  | -1.184825 | -3.812123 |
| 41     | 6      | 0    | -2.105093 | 1.511727  | 4.550350  |
| 42     | 16     | 0    | -0.598482 | 0.862880  | 3.810931  |
| 43     | 8      | 0    | 0.532962  | 1.466054  | 4.535298  |
| 44     | 8      | 0    | -0.698680 | -0.594570 | 3.715177  |
| 45     | 6      | 0    | 0.223877  | 2.731478  | 2.026296  |
| 46     | 1      | 0    | -1.759834 | -1.079967 | -0.956443 |
| 47     | 1      | 0    | 5.598599  | -2.115945 | -0.704715 |
| 48     | 1      | 0    | 3.853807  | -4.117289 | -1.516032 |
| 49     | 1      | 0    | -1.015563 | -3.826468 | -3.684258 |
| 50     | 1      | 0    | -2.044079 | -5.371496 | -2.050390 |
| 51     | 1      | 0    | -0.983335 | -5.719847 | 0.150874  |
| 52     | 1      | 0    | 5.468173  | 3.150488  | -0.400270 |
| 53     | 1      | 0    | 5.582711  | 3.317267  | 2.060187  |
| 54     | 1      | 0    | 4.916687  | 1.394481  | 3.461997  |
| 55     | 1      | 0    | -5.514840 | 0.404699  | 3.525219  |
| 56     | 1      | 0    | -6.035122 | -1.213410 | 4.058458  |
| 57     | 1      | 0    | -4.304724 | -0.782690 | 4.062564  |



|     |    |   |           |           |           |
|-----|----|---|-----------|-----------|-----------|
| 58  | 1  | 0 | -6.998848 | -0.505084 | 1.509680  |
| 59  | 1  | 0 | -6.255069 | -1.751255 | 0.488040  |
| 60  | 1  | 0 | -6.975405 | -2.201574 | 2.043681  |
| 61  | 1  | 0 | 0.620178  | -5.564849 | 1.523221  |
| 62  | 1  | 0 | 2.977949  | -5.674699 | 0.650578  |
| 63  | 1  | 0 | 2.811782  | -5.384472 | 2.385619  |
| 64  | 1  | 0 | 3.264075  | -4.058888 | 1.320240  |
| 65  | 1  | 0 | -0.409551 | -3.432102 | 2.221277  |
| 66  | 1  | 0 | 0.947874  | -3.869594 | 3.271133  |
| 67  | 1  | 0 | 1.123560  | -2.592756 | 2.058078  |
| 68  | 1  | 0 | 3.318608  | -1.683131 | 2.179818  |
| 69  | 1  | 0 | 5.746272  | -2.265111 | 1.954195  |
| 70  | 1  | 0 | 5.098316  | -2.796504 | 3.514004  |
| 71  | 1  | 0 | 6.099750  | -1.338068 | 3.418598  |
| 72  | 1  | 0 | 2.584369  | -0.015972 | 3.957300  |
| 73  | 1  | 0 | 3.104902  | -1.591129 | 4.566897  |
| 74  | 1  | 0 | 4.176051  | -0.202679 | 4.712517  |
| 75  | 1  | 0 | 4.704133  | 2.234028  | -2.224809 |
| 76  | 1  | 0 | 6.983272  | 1.280117  | -1.904371 |
| 77  | 1  | 0 | 6.314114  | 0.869920  | -3.494768 |
| 78  | 1  | 0 | 6.354981  | -0.345466 | -2.213125 |
| 79  | 1  | 0 | 2.703566  | 0.695891  | -2.415823 |
| 80  | 1  | 0 | 3.769892  | 0.785613  | -3.821891 |
| 81  | 1  | 0 | 3.840326  | -0.629143 | -2.779791 |
| 82  | 1  | 0 | 2.096022  | -1.856713 | -3.028727 |
| 83  | 1  | 0 | 2.365405  | -3.887855 | -4.458448 |
| 84  | 1  | 0 | 2.121029  | -2.419826 | -5.421565 |
| 85  | 1  | 0 | 0.796325  | -3.570381 | -5.209011 |
| 86  | 1  | 0 | -0.043012 | -0.603042 | -2.927508 |
| 87  | 1  | 0 | 0.695444  | -0.499836 | -4.528775 |
| 88  | 1  | 0 | -0.689802 | -1.567301 | -4.263993 |
| 89  | 1  | 0 | -2.925210 | 1.195565  | 3.906735  |
| 90  | 1  | 0 | -2.178269 | 1.089291  | 5.554710  |
| 91  | 1  | 0 | -2.017054 | 2.597888  | 4.599027  |
| 92  | 1  | 0 | -0.375713 | 3.510747  | 1.551459  |
| 93  | 1  | 0 | 1.080761  | 2.499486  | 1.386571  |
| 94  | 1  | 0 | 0.591907  | 3.091369  | 2.984882  |
| 95  | 1  | 0 | -0.912092 | 1.609347  | -0.129158 |
| 96  | 7  | 0 | -1.100535 | 2.491065  | -1.035601 |
| 97  | 16 | 0 | -2.682839 | 2.808396  | -1.496417 |
| 98  | 16 | 0 | 0.219117  | 2.991979  | -1.925039 |
| 99  | 6  | 0 | -3.215009 | 3.881618  | -0.058316 |
| 100 | 6  | 0 | 0.373007  | 4.840033  | -1.605321 |
| 101 | 8  | 0 | -3.468467 | 1.585847  | -1.375383 |
| 102 | 8  | 0 | -2.750526 | 3.652424  | -2.681965 |
| 103 | 8  | 0 | 1.382378  | 2.418837  | -1.245229 |
| 104 | 8  | 0 | 0.040447  | 2.840398  | -3.362776 |
| 105 | 9  | 0 | -4.485398 | 4.242183  | -0.242548 |
| 106 | 9  | 0 | -3.106706 | 3.205708  | 1.087759  |
| 107 | 9  | 0 | -2.449068 | 4.975978  | 0.007087  |
| 108 | 9  | 0 | -0.635365 | 5.519639  | -2.139540 |
| 109 | 9  | 0 | 1.521747  | 5.239534  | -2.157395 |
| 110 | 9  | 0 | 0.417443  | 5.073929  | -0.289035 |
| 111 | 6  | 0 | -4.208210 | -2.576542 | -0.589454 |
| 112 | 6  | 0 | -4.727685 | -3.782339 | -0.169442 |
| 113 | 16 | 0 | -4.334284 | -2.440917 | -2.333105 |
| 114 | 6  | 0 | -5.212648 | -4.596168 | -1.234297 |
| 115 | 1  | 0 | -4.739731 | -4.076667 | 0.873943  |
| 116 | 6  | 0 | -5.062519 | -4.007631 | -2.462183 |

|     |   |   |           |           |           |
|-----|---|---|-----------|-----------|-----------|
| 117 | 1 | 0 | -5.653390 | -5.576623 | -1.091493 |
| 118 | 1 | 0 | -5.352279 | -4.393892 | -3.429833 |

---

Sum of electronic and zero-point Energies= -4738.663232

Sum of electronic and thermal Energies= -4738.592485

Sum of electronic and thermal Enthalpies= -4738.591541

Sum of electronic and thermal Free Energies= -4738.778853
